# Supplementary material for: Ab initio study of chain branching reactions involving second generation products in hydrocarboncombustion mechanisms
Source: Royal Society of Chemistry journal article supplement (doi:10.1039/c1cp22602a), 2011-11-02
Supplement: c1cp22602a.pdf [file c1cp22602a.pdf]

## Ab Initio Study of Chain Branching Reactions Involving Second Generation Products in Hydrocarbon Combustion Mechanisms

Alexander C. Davis and Joseph S. Francisco

Department of Chemistry and Department of Earth and Atmospheric Science  
Purdue University, West Lafayette, Indiana 47907-1393

### Supporting Information.

G4 frequencies and rotational constants for the reactants, products, and transition state species of s-alkyl radicals H-migrations (**Table S.1**)

G4 heat capacities for s-alkyl radicals and transition states. Units are cal mol<sup>-1</sup> K<sup>-1</sup> for S, cal mol<sup>-1</sup> K<sup>-1</sup> for Cp and kcal mol<sup>-1</sup> for ddH. (**Table S.2**)

G4 Arrhenius pre-exponential A-factors for the forward and reverse s-alkyl radical H-migrations. (**Table S.3**)

Skodje and Truhlar tunneling transmission coefficient for s-alkyl radical H-migrations, determined using G4 frequencies and energy values. (**Table S.4**)

Wigner tunneling transmission coefficient for s-alkyl radical H-migrations, determined using G4 frequencies and energy values. (**Table S.5**)

G4 cartesian coordinates for s-alkyl radical H-migration reactants and products. (**Table S.6**)

G4 cartesian coordinates for s-alkyl radical H-migration transition states. (**Table S.7**)

Evans Polanyi plot of activation energy versus reaction enthalpy for s-alkyl radical H-migrations (**Figure S.1**).

Table S.1: G4 frequencies and rotational constants for the reactants, products, and transition state species of s-alkyl radicals H-migrations.

| Methylalkyl radical | rxn type                                                 | Frequencies (cm <sup>-1</sup> )                                                                                                                                                                                                                                                                   | Rotational Constants (GHz) |       |       |
|---------------------|----------------------------------------------------------|---------------------------------------------------------------------------------------------------------------------------------------------------------------------------------------------------------------------------------------------------------------------------------------------------|----------------------------|-------|-------|
|                     |                                                          |                                                                                                                                                                                                                                                                                                   | A                          | B     | C     |
| 2-Butyl             |                                                          | 63, 112, 233, 260, 409, 427, 767, 846, 973, 986, 1027, 1072, 1136, 1181, 1270, 1314, 1402, 1408, 1414, 1469, 1475, 1486, 1497, 1505, 2917, 2946, 2999, 3032, 3033, 3091, 3099, 3107, 3157                                                                                                         | 26.464                     | 3.626 | 3.413 |
| 2-Butyl             | 3S <sub>α</sub> S <sub>α</sub>                           | -1944, 159, 182, 211, 265, 402, 621, 738, 849, 970, 1039, 1043, 1054, 1150, 1213, 1260, 1317, 1403, 1413, 1419, 1482, 1484, 1492, 1497, 2199, 2970, 2974, 3048, 3048, 3094, 3094, 3155, 3167                                                                                                      | 27.025                     | 3.580 | 3.421 |
| 2-Pentyl            |                                                          | 57, 99, 128, 188, 240, 386, 401, 417, 736, 855, 875, 933, 981, 1038, 1060, 1093, 1140, 1173, 1249, 1285, 1318, 1368, 1405, 1411, 1417, 1467, 1475, 1486, 1491, 1499, 1509, 2907, 2946, 2990, 3020, 3028, 3033, 3053, 3090, 3094, 3101, 3156                                                       | 19.303                     | 1.930 | 1.842 |
| 3-Pentyl            |                                                          | 50, 59, 181, 237, 241, 390, 403, 412, 753, 781, 874, 947, 1023, 1041, 1046, 1086, 1143, 1172, 1261, 1276, 1281, 1365, 1406, 1411, 1421, 1464, 1475, 1497, 1498, 1505, 1505, 2915, 2920, 2999, 3004, 3033, 3034, 3100, 3100, 3107, 3107, 3141                                                      | 16.589                     | 1.977 | 1.863 |
| 2-Pentyl            | 3S <sub>β</sub> S <sub>α</sub>                           | -1940, 91, 137, 181, 207, 253, 380, 395, 625, 731, 791, 872, 949, 1014, 1047, 1071, 1086, 1163, 1195, 1246, 1293, 1297, 1365, 1408, 1412, 1422, 1480, 1483, 1494, 1496, 1505, 2196, 2947, 2972, 3022, 3032, 3048, 3094, 3098, 3105, 3146, 3163                                                    | 19.174                     | 1.914 | 1.845 |
| 2-Pentyl            | 4 <sup>c</sup> S <sub>α</sub> S <sub>α</sub>             | -2104, 65, 184, 201, 258, 346, 364, 533, 698, 843, 863, 882, 898, 972, 1047, 1071, 1104, 1138, 1168, 1212, 1253, 1331, 1341, 1374, 1403, 1410, 1483, 1484, 1488, 1492, 1494, 1773, 2987, 2988, 3047, 3055, 3058, 3088, 3094, 3097, 3110, 3119                                                     | 9.529                      | 2.621 | 2.381 |
| 2-Pentyl            | 4 <sup>t</sup> S <sub>α</sub> S <sub>α</sub>             | -2096, 54, 160, 204, 225, 289, 397, 592, 712, 817, 843, 889, 890, 974, 1045, 1071, 1100, 1128, 1164, 1218, 1253, 1318, 1355, 1355, 1407, 1407, 1480, 1485, 1489, 1491, 1491, 1770, 2989, 2989, 3049, 3054, 3055, 3089, 3095, 3095, 3113, 3118                                                     | 13.044                     | 2.324 | 2.263 |
| 2-Hexyl             |                                                          | 48, 86, 110, 124, 143, 246, 298, 361, 411, 463, 730, 781, 894, 907, 916, 986, 1021, 1058, 1068, 1103, 1140, 1170, 1234, 1267, 1303, 1326, 1337, 1391, 1404, 1411, 1416, 1466, 1474, 1485, 1486, 1497, 1499, 1512, 2906, 2946, 2991, 3006, 3016, 3029, 3032, 3032, 3057, 3090, 3095, 3100, 3157    | 15.826                     | 1.136 | 1.100 |
| 3-Hexyl             |                                                          | 43, 48, 111, 154, 239, 249, 293, 371, 415, 464, 732, 770, 857, 895, 908, 1021, 1036, 1054, 1073, 1099, 1143, 1168, 1247, 1263, 1272, 1318, 1338, 1386, 1408, 1411, 1423, 1463, 1474, 1491, 1498, 1500, 1505, 1509, 2906, 2918, 2993, 3002, 3021, 3028, 3034, 3054, 3095, 3100, 3101, 3106, 3141   | 14.543                     | 1.146 | 1.106 |
| 2-Hexyl             | 3S <sub>β</sub> S <sub>α</sub>                           | -1939, 76, 98, 119, 193, 204, 244, 296, 364, 447, 625, 730, 754, 871, 896, 908, 1021, 1037, 1057, 1073, 1107, 1159, 1193, 1237, 1271, 1287, 1321, 1335, 1388, 1410, 1414, 1421, 1477, 1483, 1492, 1494, 1499, 1510, 2197, 2937, 2972, 3010, 3020, 3028, 3048, 3053, 3094, 3094, 3101, 3146, 3163  | 16.087                     | 1.125 | 1.097 |
| 2-Hexyl             | 4 <sup>c</sup> S <sub>β</sub> S <sub>α</sub>             | -2099, 56, 93, 176, 222, 239, 273, 358, 414, 550, 693, 782, 840, 869, 888, 922, 988, 1018, 1057, 1095, 1099, 1130, 1171, 1208, 1252, 1281, 1309, 1337, 1354, 1391, 1408, 1412, 1478, 1483, 1490, 1492, 1497, 1505, 1767, 2962, 2987, 3022, 3032, 3047, 3056, 3086, 3094, 3098, 3102, 3105, 3116   | 6.720                      | 1.573 | 1.440 |
| 2-Hexyl             | 4 <sup>t</sup> S <sub>β</sub> S <sub>α</sub>             | -2090, 56, 96, 137, 213, 229, 256, 334, 434, 599, 710, 782, 825, 840, 894, 916, 989, 1019, 1056, 1090, 1098, 1125, 1170, 1214, 1253, 1277, 1304, 1332, 1356, 1388, 1407, 1413, 1478, 1481, 1488, 1491, 1498, 1505, 1766, 2963, 2989, 3019, 3032, 3049, 3054, 3087, 3095, 3097, 3103, 3105, 3116   | 8.396                      | 1.445 | 1.352 |
| 2-Hexyl             | 5S <sub>α</sub> <sup>A</sup> S <sub>α</sub> <sup>A</sup> | -1835, 100, 144, 183, 198, 205, 352, 357, 574, 597, 782, 801, 809, 878, 927, 930, 944, 1021, 1056, 1056, 1114, 1120, 1161, 1212, 1229, 1318, 1324, 1337, 1361, 1400, 1406, 1422, 1480, 1486, 1489, 1491, 1495, 1500, 1627, 2998, 2998, 3024, 3033, 3056, 3060, 3062, 3076, 3090, 3091, 3108, 3109 | 5.634                      | 2.064 | 1.880 |

|          |                                  |                                                                                                                                                                                                                                                                                                                                                    |        |       |       |
|----------|----------------------------------|----------------------------------------------------------------------------------------------------------------------------------------------------------------------------------------------------------------------------------------------------------------------------------------------------------------------------------------------------|--------|-------|-------|
| 2-Hexyl  | $5s_{\alpha}A_{s_{\alpha}}E$     | -1848, 88, 152, 181, 189, 260, 341, 371, 493, 576, 761, 807, 845, 877, 925, 940, 954, 1014, 1052, 1083, 1115, 1128, 1165, 1224, 1227, 1303, 1327, 1345, 1371, 1403, 1405, 1421, 1480, 1485, 1487, 1489, 1495, 1498, 1633, 2988, 2996, 3020, 3027, 3050, 3055, 3060, 3066, 3075, 3090, 3096, 3108                                                   | 4.869  | 2.248 | 1.804 |
| 2-Hexyl  | $5s_{\alpha}E_{s_{\alpha}}E$     | -1850, 115, 145, 179, 185, 207, 353, 381, 510, 534, 743, 833, 840, 884, 926, 937, 967, 1002, 1062, 1084, 1127, 1128, 1176, 1225, 1229, 1297, 1318, 1366, 1370, 1402, 1408, 1430, 1483, 1485, 1486, 1490, 1493, 1498, 1643, 2988, 2989, 3017, 3020, 3050, 3054, 3055, 3058, 3069, 3075, 3095, 3096                                                  | 5.655  | 1.950 | 1.597 |
| 3-Hexyl  | $3s_{\beta}S_{\beta}$            | -1935, 62, 104, 126, 163, 242, 247, 312, 356, 455, 634, 727, 789, 792, 902, 902, 1023, 1036, 1073, 1089, 1096, 1168, 1185, 1234, 1282, 1282, 1301, 1339, 1385, 1408, 1408, 1425, 1478, 1480, 1496, 1496, 1505, 1506, 2193, 2945, 2948, 3021, 3021, 3031, 3032, 3098, 3098, 3105, 3105, 3143, 3154                                                  | 15.315 | 1.123 | 1.103 |
| 2-Heptyl |                                  | 45, 71, 96, 110, 122, 153, 245, 247, 305, 402, 422, 479, 729, 750, 833, 885, 921, 950, 989, 1002, 1048, 1065, 1076, 1110, 1140, 1168, 1226, 1256, 1285, 1315, 1325, 1330, 1370, 1399, 1405, 1414, 1415, 1467, 1475, 1484, 1486, 1489, 1500, 1502, 1514, 2908, 2946, 2991, 3000, 3009, 3017, 3023, 3028, 3033, 3043, 3060, 3090, 3094, 3100, 3156   | 13.103 | 0.726 | 0.708 |
| 3-Heptyl |                                  | 38, 40, 87, 118, 129, 234, 243, 247, 308, 406, 414, 481, 728, 762, 787, 884, 913, 929, 1001, 1038, 1042, 1066, 1078, 1108, 1142, 1165, 1233, 1251, 1270, 1302, 1314, 1326, 1366, 1396, 1408, 1412, 1421, 1463, 1474, 1485, 1497, 1498, 1499, 1505, 1512, 2907, 2918, 2992, 3001, 3007, 3016, 3028, 3032, 3034, 3057, 3094, 3100, 3100, 3107, 3141  | 11.347 | 0.736 | 0.713 |
| 4-Heptyl |                                  | 34, 44, 87, 119, 152, 239, 243, 244, 302, 416, 422, 480, 729, 742, 847, 870, 882, 914, 998, 1046, 1048, 1066, 1086, 1106, 1142, 1165, 1242, 1251, 1255, 1314, 1317, 1320, 1367, 1393, 1410, 1412, 1422, 1463, 1473, 1491, 1492, 1499, 1500, 1509, 1509, 2905, 2909, 2992, 2998, 3020, 3021, 3028, 3028, 3053, 3054, 3094, 3094, 3101, 3101, 3140   | 12.307 | 0.727 | 0.711 |
| 2-Heptyl | $3s_{\beta}S_{\alpha}$           | -1940, 58, 84, 95, 133, 182, 199, 243, 254, 301, 412, 462, 625, 730, 742, 797, 884, 920, 932, 1006, 1028, 1059, 1064, 1075, 1116, 1159, 1191, 1230, 1256, 1278, 1313, 1315, 1328, 1368, 1399, 1410, 1414, 1421, 1477, 1483, 1486, 1494, 1498, 1499, 1512, 2196, 2937, 2972, 3005, 3010, 3017, 3028, 3032, 3047, 3057, 3094, 3094, 3100, 3146, 3163 | 13.070 | 0.721 | 0.706 |
| 2-Heptyl | $4^{\circ}s_{\beta}S_{\alpha}$   | -2099, 44, 79, 108, 158, 200, 242, 249, 353, 375, 391, 565, 696, 746, 835, 863, 871, 903, 929, 946, 1033, 1051, 1061, 1092, 1114, 1134, 1169, 1205, 1251, 1258, 1286, 1321, 1335, 1345, 1370, 1396, 1408, 1413, 1475, 1483, 1490, 1491, 1492, 1499, 1510, 1766, 2951, 2987, 3010, 3020, 3028, 3047, 3052, 3056, 3086, 3094, 3095, 3100, 3102, 3116 | 5.443  | 0.972 | 0.904 |
| 2-Heptyl | $4^{\dagger}s_{\beta}S_{\alpha}$ | -2091, 43, 82, 100, 138, 188, 214, 249, 314, 385, 418, 607, 710, 748, 815, 850, 866, 904, 926, 944, 1035, 1052, 1056, 1089, 1112, 1130, 1168, 1210, 1252, 1257, 1282, 1320, 1328, 1355, 1361, 1397, 1406, 1413, 1475, 1481, 1488, 1491, 1492, 1500, 1509, 1766, 2952, 2988, 3008, 3020, 3028, 3049, 3052, 3054, 3087, 3094, 3095, 3100, 3103, 3116 | 7.374  | 0.880 | 0.847 |
| 2-Heptyl | $5s_{\beta}A_{s_{\alpha}}A$      | -1830, 78, 94, 121, 169, 205, 240, 282, 357, 400, 574, 611, 754, 788, 803, 849, 878, 918, 942, 963, 1008, 1045, 1059, 1075, 1107, 1123, 1167, 1211, 1228, 1277, 1311, 1320, 1329, 1349, 1382, 1404, 1409, 1423, 1477, 1483, 1488, 1494, 1497, 1499, 1504, 1624, 2972, 2998, 3024, 3025, 3030, 3034, 3056, 3062, 3075, 3091, 3091, 3098, 3103, 3108 | 3.952  | 1.391 | 1.200 |
| 2-Heptyl | $5s_{\beta}A_{s_{\alpha}}E$      | -1844, 64, 88, 138, 181, 212, 245, 288, 367, 403, 491, 589, 736, 798, 823, 850, 888, 921, 945, 967, 1012, 1040, 1071, 1079, 1112, 1130, 1171, 1223, 1225, 1276, 1302, 1316, 1331, 1365, 1383, 1405, 1410, 1422, 1477, 1484, 1486, 1492, 1496, 1498, 1505, 1630, 2969, 2988, 3019, 3024, 3029, 3030, 3050, 3055, 3065, 3075, 3091, 3095, 3098, 3103 | 3.231  | 1.599 | 1.201 |

|          |                                 |                                                                                                                                                                                                                                                                                                                                                                                                      |        |       |       |
|----------|---------------------------------|------------------------------------------------------------------------------------------------------------------------------------------------------------------------------------------------------------------------------------------------------------------------------------------------------------------------------------------------------------------------------------------------------|--------|-------|-------|
| 2-Heptyl | $5s_{\beta}E_{s_{\alpha}}E$     | -1846, 77, 110, 135, 153, 191, 249, 283, 372, 413, 511, 534, 740, 785, 839, 856, 898, 932, 951, 962, 997, 1038, 1069, 1106, 1121, 1130, 1178, 1221, 1223, 1284, 1293, 1309, 1344, 1368, 1387, 1405, 1412, 1429, 1479, 1484, 1486, 1492, 1498, 1500, 1506, 1637, 2962, 2988, 3018, 3019, 3025, 3031, 3049, 3054, 3056, 3067, 3074, 3095, 3098, 3103                                                   | 3.730  | 1.349 | 1.066 |
| 2-Heptyl | $6s_{\alpha}A_{s_{\alpha}}A$    | -1697, 92, 109, 171, 187, 234, 239, 334, 385, 457, 496, 542, 763, 800, 808, 865, 866, 925, 958, 968, 990, 1037, 1078, 1079, 1127, 1130, 1160, 1205, 1214, 1283, 1334, 1338, 1356, 1357, 1374, 1403, 1408, 1424, 1474, 1478, 1485, 1485, 1490, 1495, 1497, 1514, 2985, 2987, 2995, 2996, 3021, 3039, 3045, 3059, 3063, 3069, 3082, 3083, 3098, 3102                                                   | 2.973  | 2.063 | 1.462 |
| 2-Heptyl | $6s_{\alpha}A_{s_{\alpha}}E$    | -1699, 95, 117, 167, 185, 197, 260, 342, 370, 431, 468, 565, 789, 803, 831, 844, 884, 898, 959, 963, 1009, 1035, 1071, 1097, 1125, 1133, 1169, 1204, 1223, 1283, 1322, 1344, 1355, 1370, 1381, 1403, 1407, 1430, 1475, 1480, 1485, 1489, 1491, 1494, 1495, 1519, 2984, 2987, 2991, 2998, 3014, 3027, 3043, 3054, 3060, 3064, 3068, 3083, 3096, 3100                                                  | 3.178  | 1.787 | 1.341 |
| 2-Heptyl | $6s_{\alpha}E_{s_{\alpha}}E$    | -1713, 92, 95, 186, 192, 247, 270, 331, 374, 404, 436, 521, 764, 808, 844, 866, 881, 936, 957, 962, 1020, 1045, 1078, 1100, 1122, 1138, 1181, 1208, 1228, 1281, 1323, 1330, 1365, 1379, 1381, 1404, 1408, 1426, 1476, 1484, 1486, 1486, 1492, 1493, 1496, 1522, 2984, 2986, 2989, 2991, 3010, 3021, 3032, 3053, 3055, 3063, 3064, 3068, 3095, 3096                                                   | 2.887  | 1.913 | 1.273 |
| 3-Heptyl | $3s_{\beta}S_{\beta}$           | -1935, 55, 76, 96, 137, 162, 234, 248, 277, 300, 404, 470, 634, 726, 750, 793, 870, 886, 919, 1000, 1043, 1056, 1080, 1093, 1108, 1165, 1184, 1228, 1263, 1276, 1297, 1317, 1322, 1365, 1395, 1408, 1411, 1424, 1475, 1480, 1491, 1496, 1500, 1506, 1509, 2193, 2936, 2947, 3010, 3020, 3021, 3028, 3032, 3053, 3094, 3098, 3100, 3105, 3143, 3154                                                   | 12.929 | 0.717 | 0.706 |
| 3-Heptyl | $4^{\circ}s_{\beta}S_{\beta}$   | -2094, 44, 88, 95, 182, 222, 240, 261, 281, 390, 441, 560, 689, 770, 792, 844, 882, 886, 953, 987, 1016, 1027, 1089, 1095, 1099, 1118, 1175, 1204, 1250, 1280, 1280, 1305, 1314, 1347, 1372, 1400, 1412, 1412, 1476, 1480, 1488, 1497, 1498, 1505, 1506, 1762, 2962, 2962, 3020, 3023, 3032, 3032, 3048, 3085, 3094, 3098, 3099, 3105, 3105, 3109                                                    | 4.244  | 1.105 | 0.965 |
| 3-Heptyl | $4^{\dagger}s_{\beta}S_{\beta}$ | -2087, 45, 82, 115, 125, 210, 241, 261, 284, 408, 438, 608, 730, 772, 798, 820, 851, 905, 949, 955, 997, 1028, 1057, 1090, 1101, 1134, 1173, 1211, 1253, 1273, 1287, 1305, 1328, 1349, 1369, 1389, 1405, 1413, 1476, 1478, 1488, 1497, 1498, 1505, 1505, 1767, 2963, 3013, 3020, 3027, 3032, 3049, 3051, 3085, 3095, 3097, 3099, 3102, 3105, 3109                                                    | 7.910  | 0.912 | 0.874 |
| 2-Octyl  |                                 | 38, 65, 79, 82, 116, 142, 150, 200, 248, 275, 335, 411, 468, 469, 729, 738, 785, 876, 892, 910, 969, 998, 1009, 1021, 1060, 1070, 1081, 1115, 1140, 1166, 1221, 1247, 1271, 1299, 1312, 1327, 1334, 1349, 1388, 1401, 1405, 1413, 1414, 1466, 1475, 1483, 1484, 1486, 1494, 1500, 1506, 1515, 2908, 2946, 2990, 2999, 3002, 3012, 3017, 3020, 3028, 3032, 3033, 3049, 3062, 3090, 3094, 3100, 3156   | 11.391 | 0.491 | 0.481 |
| 3-Octyl  |                                 | 32, 37, 64, 97, 109, 146, 196, 238, 243, 281, 333, 411, 466, 470, 727, 746, 771, 834, 891, 912, 960, 1002, 1020, 1043, 1054, 1070, 1085, 1116, 1142, 1163, 1226, 1243, 1269, 1285, 1297, 1324, 1330, 1347, 1384, 1400, 1408, 1413, 1421, 1463, 1474, 1484, 1489, 1497, 1499, 1502, 1505, 1514, 2907, 2918, 2992, 3000, 3002, 3009, 3018, 3023, 3028, 3033, 3043, 3061, 3094, 3099, 3100, 3106, 3141  | 10.296 | 0.494 | 0.484 |
| 4-Octyl  |                                 | 26, 40, 72, 106, 125, 141, 196, 240, 247, 277, 335, 421, 467, 470, 728, 738, 782, 858, 888, 906, 923, 1002, 1020, 1054, 1059, 1067, 1096, 1112, 1142, 1163, 1233, 1241, 1251, 1298, 1306, 1318, 1328, 1347, 1383, 1398, 1410, 1412, 1421, 1462, 1473, 1485, 1491, 1497, 1499, 1500, 1509, 1512, 2905, 2909, 2993, 2998, 3007, 3016, 3021, 3028, 3028, 3033, 3053, 3057, 3094, 3095, 3100, 3101, 3140 | 10.019 | 0.494 | 0.484 |
| 2-Octyl  | $3s_{\beta}S_{\alpha}$          | -1940, 48, 72, 75, 117, 141, 173, 197, 216, 249, 277, 336, 450, 466, 625, 729, 736, 764, 845, 891, 914, 966, 1004, 1031, 1033, 1065, 1072, 1074, 1123, 1159, 1190,                                                                                                                                                                                                                                   | 11.517 | 0.487 | 0.480 |

|         |                              |                                                                                                                                                                                                                                                                                                                                                                                                       |       |       |       |
|---------|------------------------------|-------------------------------------------------------------------------------------------------------------------------------------------------------------------------------------------------------------------------------------------------------------------------------------------------------------------------------------------------------------------------------------------------------|-------|-------|-------|
|         |                              | 1224, 1247, 1268, 1297, 1302, 1325, 1332, 1347, 1385, 1402, 1412, 1414, 1420, 1477, 1483, 1484, 1490, 1494, 1500, 1503, 1514, 2196, 2938, 2972, 3000, 3006, 3013, 3018, 3023, 3028, 3043, 3047, 3060, 3094, 3095, 3100, 3146, 3163                                                                                                                                                                    |       |       |       |
| 2-Octyl | $4^c s_{\beta} s_{\alpha}$   | -2100, 39, 59, 94, 118, 140, 190, 237, 250, 292, 340, 361, 459, 562, 696, 736, 786, 853, 868, 889, 897, 949, 955, 1015, 1046, 1061, 1068, 1094, 1117, 1135, 1169, 1204, 1242, 1250, 1271, 1307, 1326, 1329, 1339, 1355, 1387, 1398, 1407, 1414, 1475, 1483, 1486, 1490, 1491, 1498, 1499, 1512, 1764, 2951, 2987, 3005, 3010, 3017, 3028, 3032, 3047, 3056, 3057, 3086, 3094, 3094, 3100, 3101, 3116  | 4.658 | 0.632 | 0.599 |
| 2-Octyl | $4^t s_{\beta} s_{\alpha}$   | -2091, 44, 60, 92, 108, 142, 171, 213, 250, 260, 346, 376, 463, 606, 710, 737, 787, 832, 854, 890, 898, 947, 955, 1014, 1050, 1057, 1069, 1090, 1115, 1133, 1168, 1208, 1240, 1254, 1267, 1307, 1323, 1329, 1339, 1356, 1384, 1400, 1406, 1416, 1475, 1481, 1485, 1488, 1490, 1498, 1501, 1512, 1765, 2953, 2988, 3005, 3009, 3017, 3029, 3032, 3049, 3054, 3057, 3087, 3094, 3095, 3100, 3103, 3116  | 5.863 | 0.588 | 0.565 |
| 2-Octyl | $5s_{\beta} A s_{\alpha}^A$  | -1830, 62, 69, 105, 127, 177, 205, 212, 246, 357, 375, 399, 575, 609, 737, 791, 804, 815, 877, 897, 907, 946, 956, 991, 1042, 1054, 1073, 1081, 1114, 1129, 1165, 1207, 1227, 1255, 1285, 1318, 1321, 1329, 1345, 1364, 1391, 1405, 1412, 1422, 1475, 1483, 1488, 1491, 1494, 1499, 1500, 1509, 1624, 2961, 2998, 3012, 3019, 3024, 3028, 3034, 3051, 3057, 3062, 3076, 3091, 3092, 3095, 3100, 3108  | 3.532 | 0.851 | 0.776 |
| 2-Octyl | $5s_{\beta} A s_{\alpha}^E$  | -1844, 51, 71, 107, 134, 187, 192, 244, 256, 353, 377, 404, 495, 588, 729, 776, 813, 857, 877, 896, 905, 941, 970, 994, 1045, 1052, 1076, 1092, 1122, 1131, 1168, 1221, 1223, 1255, 1284, 1306, 1320, 1332, 1355, 1371, 1392, 1406, 1412, 1422, 1474, 1484, 1486, 1491, 1492, 1498, 1500, 1509, 1630, 2959, 2988, 3011, 3018, 3021, 3028, 3029, 3050, 3052, 3055, 3065, 3075, 3092, 3094, 3096, 3100  | 2.771 | 0.980 | 0.802 |
| 2-Octyl | $5s_{\beta} E s_{\alpha}^E$  | -1847, 63, 72, 112, 138, 159, 195, 228, 243, 336, 389, 402, 515, 557, 734, 756, 833, 852, 885, 896, 906, 957, 971, 984, 1041, 1061, 1077, 1107, 1127, 1130, 1177, 1217, 1221, 1265, 1280, 1305, 1324, 1331, 1367, 1372, 1395, 1405, 1412, 1429, 1476, 1484, 1486, 1491, 1493, 1498, 1499, 1510, 1636, 2951, 2988, 3012, 3018, 3019, 3021, 3028, 3049, 3051, 3054, 3057, 3067, 3074, 3094, 3096, 3100  | 3.350 | 0.820 | 0.699 |
| 2-Octyl | $6s_{\beta} A s_{\alpha}^A$  | -1700, 72, 84, 99, 165, 195, 212, 251, 297, 357, 406, 458, 512, 542, 746, 791, 808, 810, 869, 887, 933, 941, 985, 992, 1031, 1058, 1079, 1091, 1121, 1131, 1164, 1206, 1214, 1274, 1284, 1317, 1336, 1353, 1357, 1367, 1384, 1406, 1410, 1423, 1475, 1477, 1480, 1484, 1492, 1493, 1497, 1503, 1510, 2966, 2986, 2988, 2996, 3019, 3027, 3030, 3039, 3045, 3061, 3068, 3076, 3082, 3096, 3099, 3102   | 2.328 | 1.439 | 1.020 |
| 2-Octyl | $6s_{\beta} A s_{\alpha}^E$  | -1698, 76, 79, 106, 151, 190, 231, 252, 300, 335, 379, 461, 477, 568, 756, 796, 831, 834, 843, 894, 914, 940, 975, 1010, 1035, 1057, 1084, 1096, 1119, 1135, 1173, 1204, 1223, 1277, 1282, 1317, 1326, 1357, 1366, 1380, 1383, 1406, 1409, 1430, 1475, 1479, 1484, 1485, 1492, 1493, 1497, 1504, 1515, 2970, 2984, 2987, 2992, 3013, 3024, 3028, 3030, 3042, 3054, 3063, 3067, 3077, 3095, 3096, 3102 | 2.217 | 1.354 | 0.954 |
| 2-Octyl | $6s_{\beta} E s_{\alpha}^E$  | -1711, 62, 84, 98, 175, 196, 233, 272, 312, 361, 379, 431, 436, 515, 753, 793, 818, 844, 883, 887, 940, 959, 980, 1001, 1047, 1052, 1086, 1112, 1117, 1137, 1182, 1207, 1221, 1268, 1299, 1302, 1328, 1360, 1366, 1380, 1390, 1407, 1412, 1424, 1475, 1480, 1485, 1487, 1492, 1496, 1499, 1506, 1520, 2961, 2984, 2987, 2991, 3010, 3021, 3021, 3031, 3031, 3054, 3056, 3064, 3068, 3094, 3097, 3102  | 2.238 | 1.327 | 0.908 |
| 2-Octyl | $7s_{\alpha} A s_{\alpha}^A$ | -1646, 67, 90, 163, 175, 184, 207, 277, 308, 345, 393, 443, 511, 538, 748, 777, 807, 860, 861, 877, 918, 926, 986, 990, 1022, 1051, 1091, 1100, 1134, 1157, 1159, 1199, 1244, 1280, 1284, 1338, 1351, 1368, 1376, 1385, 1388, 1404, 1409, 1430, 1438, 1471, 1474, 1480, 1488, 1493, 1494, 1496, 1498, 2973, 2973, 2997, 2998, 3014, 3015, 3031, 3034, 3051, 3057, 3063, 3065, 3072, 3074, 3099, 3100  | 2.197 | 1.512 | 1.165 |
| 2-Octyl | $7s_{\alpha} A s_{\alpha}^E$ | -1654, 69, 95, 170, 180, 192, 219, 275, 323, 332, 358, 441, 482, 517, 752, 772, 821, 834, 884, 900, 919, 932, 980, 997, 1046, 1054, 1093, 1101, 1126, 1151, 1165, 1215, 1244, 1277, 1285, 1329, 1345, 1373, 1382, 1385, 1389, 1403, 1410, 1425, 1442, 1473, 1478, 1482, 1489, 1489, 1492, 1496, 1497, 2972, 2974, 2994,                                                                               | 2.091 | 1.620 | 1.071 |

|         |                            |                                                                                                                                                                                                                                                                                                                                                                                                                                                                                                    |        |       |       |
|---------|----------------------------|----------------------------------------------------------------------------------------------------------------------------------------------------------------------------------------------------------------------------------------------------------------------------------------------------------------------------------------------------------------------------------------------------------------------------------------------------------------------------------------------------|--------|-------|-------|
| 2-Octyl | $7s_a^E s_a^E$             | 2995, 3003, 3015, 3018, 3032, 3049, 3052, 3055, 3060, 3064, 3072, 3095, 3099<br>-1650, 71, 134, 146, 169, 192, 223, 257, 291, 331, 333, 435, 489, 508, 772, 786,<br>812, 831, 892, 896, 932, 935, 972, 1012, 1049, 1071, 1090, 1102, 1114, 1143,<br>1178, 1221, 1248, 1273, 1283, 1324, 1334, 1380, 1383, 1385, 1388, 1403, 1408,<br>1431, 1448, 1476, 1479, 1484, 1487, 1489, 1491, 1495, 1495, 2973, 2973, 2993,<br>2994, 3003, 3003, 3017, 3017, 3049, 3050, 3052, 3053, 3060, 3062, 3095, 3095 | 1.932  | 1.660 | 0.968 |
| 3-Octyl | $3s_{\beta} s_{\beta}$     | -1935, 41, 68, 79, 112, 133, 159, 207, 245, 253, 273, 343, 455, 460, 634, 726, 738,<br>790, 797, 888, 910, 934, 1001, 1023, 1055, 1067, 1079, 1096, 1117, 1164, 1185,<br>1224, 1248, 1270, 1294, 1301, 1313, 1328, 1347, 1382, 1400, 1408, 1411, 1424,<br>1475, 1480, 1484, 1496, 1497, 1499, 1506, 1511, 2193, 2937, 2947, 3004, 3010,<br>3017, 3021, 3028, 3032, 3032, 3057, 3095, 3098, 3100, 3105, 3143, 3154                                                                                  | 10.964 | 0.486 | 0.480 |
| 3-Octyl | $4^c s_{\beta} s_{\beta}$  | -2094, 33, 75, 90, 106, 160, 209, 238, 247, 272, 360, 387, 433, 574, 691, 744, 782,<br>835, 868, 885, 904, 933, 971, 1014, 1039, 1055, 1087, 1098, 1104, 1128, 1173,<br>1201, 1250, 1257, 1279, 1287, 1308, 1321, 1343, 1356, 1383, 1402, 1412, 1412,<br>1474, 1479, 1488, 1492, 1497, 1499, 1505, 1510, 1761, 2951, 2962, 3009, 3020,<br>3022, 3028, 3032, 3048, 3053, 3085, 3094, 3095, 3099, 3100, 3105, 3109                                                                                   | 3.277  | 0.743 | 0.656 |
| 3-Octyl | $4^t s_{\beta} s_{\beta}$  | -2088, 36, 71, 80, 119, 134, 183, 222, 248, 279, 372, 406, 430, 615, 727, 758, 772,<br>824, 858, 877, 907, 937, 957, 971, 1041, 1054, 1059, 1088, 1118, 1136, 1171,<br>1207, 1252, 1256, 1279, 1287, 1321, 1327, 1348, 1356, 1374, 1397, 1405, 1413,<br>1475, 1477, 1488, 1492, 1497, 1500, 1505, 1509, 1767, 2953, 3008, 3013, 3020,<br>3027, 3028, 3049, 3051, 3053, 3085, 3094, 3095, 3098, 3101, 3102, 3109                                                                                    | 6.911  | 0.596 | 0.582 |
| 3-Octyl | $5s_{\beta}^A s_{\beta}^A$ | -1824, 64, 87, 89, 93, 159, 240, 246, 256, 300, 388, 416, 572, 621, 743, 770, 794,<br>821, 871, 873, 922, 935, 989, 1008, 1018, 1060, 1069, 1083, 1100, 1125, 1172,<br>1209, 1226, 1276, 1277, 1309, 1313, 1323, 1337, 1368, 1392, 1408, 1410, 1423,<br>1477, 1478, 1487, 1496, 1497, 1498, 1504, 1505, 1617, 2972, 2972, 3024, 3025,<br>3026, 3030, 3031, 3034, 3057, 3075, 3090, 3091, 3097, 3098, 3103, 3103                                                                                    | 2.504  | 1.095 | 0.861 |
| 3-Octyl | $5s_{\beta}^A s_{\beta}^E$ | -1838, 52, 75, 93, 131, 170, 231, 246, 253, 338, 399, 410, 488, 590, 735, 770, 806,<br>840, 868, 882, 932, 951, 974, 1016, 1018, 1050, 1074, 1095, 1121, 1124, 1175,<br>1217, 1220, 1276, 1284, 1291, 1316, 1328, 1342, 1379, 1390, 1409, 1410, 1423,<br>1476, 1479, 1486, 1495, 1496, 1498, 1504, 1506, 1624, 2961, 2970, 3019, 3023,<br>3025, 3030, 3031, 3031, 3049, 3061, 3073, 3092, 3097, 3098, 3102, 3103                                                                                   | 2.150  | 1.247 | 0.878 |
| 3-Octyl | $5s_{\beta}^E s_{\beta}^E$ | -1841, 58, 85, 103, 119, 145, 228, 245, 254, 338, 399, 419, 510, 535, 736, 780,<br>792, 843, 875, 915, 939, 940, 973, 992, 1024, 1045, 1088, 1115, 1121, 1122,<br>1180, 1216, 1218, 1281, 1283, 1289, 1301, 1339, 1348, 1380, 1392, 1409, 1413,<br>1428, 1477, 1478, 1488, 1498, 1498, 1500, 1504, 1506, 1630, 2961, 2962, 3018,<br>3019, 3024, 3025, 3031, 3031, 3048, 3054, 3064, 3073, 3097, 3098, 3103, 3103                                                                                   | 2.288  | 1.098 | 0.790 |
| 4-Octyl | $3s_{\beta} s_{\beta}$     | -1933, 46, 63, 70, 127, 128, 148, 234, 241, 243, 275, 335, 451, 464, 634, 726, 744,<br>758, 872, 874, 889, 907, 996, 1030, 1058, 1060, 1081, 1108, 1109, 1163, 1183,<br>1224, 1257, 1260, 1289, 1301, 1320, 1321, 1343, 1381, 1399, 1410, 1412, 1425,<br>1476, 1477, 1491, 1492, 1499, 1499, 1509, 1509, 2194, 2935, 2938, 3010, 3010,<br>3020, 3020, 3028, 3028, 3052, 3053, 3094, 3094, 3101, 3101, 3143, 3154                                                                                   | 11.481 | 0.483 | 0.478 |

Table S.2: G4 heat capacities for s-alkyl radicals and transition states. Units are cal mol<sup>-1</sup> K<sup>-1</sup> for S, cal mol<sup>-1</sup> K<sup>-1</sup> for Cp and kJ mol<sup>-1</sup> for ddH.

| Alkyl radical | Rxn Type                                                 | ddH | S     | Cp   |      |      |      |      |      |      |      |      |      |       |       |
|---------------|----------------------------------------------------------|-----|-------|------|------|------|------|------|------|------|------|------|------|-------|-------|
|               |                                                          |     |       | 100  | 200  | 298  | 300  | 400  | 500  | 600  | 700  | 800  | 900  | 1000  | 1500  |
| 2-Butyl       |                                                          | 4.6 | 77.8  | 13.3 | 17.7 | 22.5 | 22.6 | 28.2 | 33.6 | 38.3 | 42.4 | 45.9 | 49.0 | 51.7  | 60.8  |
| 2-Butyl       | 3s <sub>α</sub> s <sub>α</sub>                           | 4.3 | 74.8  | 12.3 | 16.9 | 21.8 | 21.9 | 27.5 | 32.8 | 37.5 | 41.5 | 44.9 | 47.9 | 50.5  | 59.3  |
| 2-Pentyl      |                                                          | 5.4 | 85.3  | 15.6 | 21.2 | 27.3 | 27.5 | 34.7 | 41.5 | 47.5 | 52.7 | 57.1 | 61.0 | 64.4  | 75.7  |
| 3-Pentyl      |                                                          | 5.3 | 85.7  | 15.1 | 21.0 | 27.3 | 27.4 | 34.7 | 41.5 | 47.5 | 52.7 | 57.1 | 61.0 | 64.4  | 75.6  |
| 2-Pentyl      | 3s <sub>β</sub> s <sub>α</sub>                           | 5.1 | 82.4  | 14.5 | 20.4 | 26.7 | 26.8 | 34.0 | 40.8 | 46.7 | 51.8 | 56.1 | 59.9 | 63.2  | 74.2  |
| 2-Pentyl      | 4 <sup>c</sup> s <sub>α</sub> s <sub>α</sub>             | 4.9 | 81.0  | 13.4 | 19.2 | 25.8 | 26.0 | 33.6 | 40.6 | 46.7 | 51.9 | 56.3 | 60.1 | 63.4  | 74.3  |
| 2-Pentyl      | 4 <sup>t</sup> s <sub>α</sub> s <sub>α</sub>             | 4.9 | 81.8  | 13.9 | 19.3 | 25.9 | 26.0 | 33.6 | 40.7 | 46.8 | 52.0 | 56.4 | 60.2 | 63.5  | 74.4  |
| 2-Hexyl       |                                                          | 6.2 | 93.2  | 18.1 | 24.8 | 32.2 | 32.4 | 41.2 | 49.5 | 56.8 | 63.0 | 68.4 | 73.0 | 77.1  | 90.5  |
| 3-Hexyl       |                                                          | 6.1 | 93.2  | 17.4 | 24.5 | 32.1 | 32.3 | 41.1 | 49.5 | 56.7 | 63.0 | 68.4 | 73.0 | 77.0  | 90.5  |
| 2-Hexyl       | 3s <sub>β</sub> s <sub>α</sub>                           | 5.9 | 90.0  | 16.9 | 23.9 | 31.5 | 31.7 | 40.5 | 48.7 | 55.9 | 62.1 | 67.4 | 71.9 | 75.9  | 89.1  |
| 2-Hexyl       | 4 <sup>c</sup> s <sub>β</sub> s <sub>α</sub>             | 5.7 | 88.5  | 15.6 | 22.7 | 30.7 | 30.9 | 40.1 | 48.6 | 56.0 | 62.2 | 67.6 | 72.2 | 76.1  | 89.2  |
| 2-Hexyl       | 4 <sup>t</sup> s <sub>β</sub> s <sub>α</sub>             | 5.7 | 89.1  | 16.1 | 22.8 | 30.7 | 30.9 | 40.1 | 48.7 | 56.0 | 62.3 | 67.6 | 72.2 | 76.1  | 89.2  |
| 2-Hexyl       | 5s <sub>α</sub> <sup>A</sup> s <sub>α</sub> <sup>A</sup> | 5.4 | 85.6  | 14.9 | 21.8 | 30.0 | 30.1 | 39.6 | 48.3 | 55.8 | 62.1 | 67.5 | 72.1 | 76.1  | 89.2  |
| 2-Hexyl       | 5s <sub>α</sub> <sup>A</sup> s <sub>α</sub> <sup>E</sup> | 5.4 | 85.7  | 14.8 | 21.8 | 30.0 | 30.2 | 39.6 | 48.3 | 55.8 | 62.1 | 67.5 | 72.1 | 76.1  | 89.2  |
| 2-Hexyl       | 5s <sub>α</sub> <sup>E</sup> s <sub>α</sub> <sup>E</sup> | 5.4 | 85.7  | 15.0 | 21.9 | 30.1 | 30.2 | 39.6 | 48.2 | 55.7 | 62.1 | 67.5 | 72.1 | 76.1  | 89.2  |
| 3-Hexyl       | 3s <sub>β</sub> s <sub>β</sub>                           | 5.9 | 90.1  | 16.7 | 23.8 | 31.5 | 31.7 | 40.5 | 48.8 | 55.9 | 62.1 | 67.4 | 71.9 | 75.9  | 89.1  |
| 2-Heptyl      |                                                          | 7.0 | 100.5 | 20.4 | 28.3 | 37.1 | 37.3 | 47.6 | 57.4 | 66.0 | 73.3 | 79.6 | 85.0 | 89.7  | 105.4 |
| 3-Heptyl      |                                                          | 7.0 | 101.3 | 20.0 | 28.1 | 37.0 | 37.2 | 47.6 | 57.5 | 66.0 | 73.3 | 79.6 | 85.0 | 89.7  | 105.4 |
| 4-Heptyl      |                                                          | 7.0 | 100.9 | 19.8 | 28.0 | 37.0 | 37.2 | 47.6 | 57.4 | 66.0 | 73.3 | 79.6 | 85.0 | 89.7  | 105.4 |
| 2-Heptyl      | 3s <sub>β</sub> s <sub>α</sub>                           | 6.8 | 97.6  | 19.3 | 27.5 | 36.4 | 36.6 | 47.0 | 56.7 | 65.2 | 72.4 | 78.6 | 83.9 | 88.6  | 104.0 |
| 2-Heptyl      | 4 <sup>c</sup> s <sub>β</sub> s <sub>α</sub>             | 6.5 | 96.2  | 18.1 | 26.2 | 35.6 | 35.8 | 46.5 | 56.6 | 65.2 | 72.6 | 78.8 | 84.2 | 88.8  | 104.1 |
| 2-Heptyl      | 4 <sup>t</sup> s <sub>β</sub> s <sub>α</sub>             | 6.6 | 96.8  | 18.5 | 26.3 | 35.6 | 35.8 | 46.6 | 56.6 | 65.3 | 72.6 | 78.8 | 84.2 | 88.8  | 104.1 |
| 2-Heptyl      | 5s <sub>β</sub> <sup>A</sup> s <sub>α</sub> <sup>A</sup> | 6.2 | 93.1  | 17.2 | 25.2 | 34.8 | 35.0 | 46.0 | 56.2 | 65.0 | 72.4 | 78.7 | 84.1 | 88.7  | 104.1 |
| 2-Heptyl      | 5s <sub>β</sub> <sup>A</sup> s <sub>α</sub> <sup>E</sup> | 6.3 | 93.3  | 17.1 | 25.3 | 34.9 | 35.1 | 46.0 | 56.2 | 65.0 | 72.4 | 78.7 | 84.1 | 88.7  | 104.1 |
| 2-Heptyl      | 5s <sub>β</sub> <sup>E</sup> s <sub>α</sub> <sup>E</sup> | 6.3 | 93.1  | 17.2 | 25.4 | 34.9 | 35.1 | 46.0 | 56.2 | 64.9 | 72.4 | 78.7 | 84.1 | 88.7  | 104.1 |
| 2-Heptyl      | 6s <sub>α</sub> <sup>A</sup> s <sub>α</sub> <sup>A</sup> | 6.1 | 90.7  | 16.2 | 24.8 | 34.6 | 34.8 | 45.9 | 56.2 | 65.0 | 72.5 | 78.8 | 84.2 | 88.8  | 104.2 |
| 2-Heptyl      | 6s <sub>α</sub> <sup>A</sup> s <sub>α</sub> <sup>E</sup> | 6.1 | 91.0  | 16.3 | 24.9 | 34.6 | 34.8 | 45.9 | 56.2 | 65.0 | 72.4 | 78.7 | 84.1 | 88.8  | 104.2 |
| 2-Heptyl      | 6s <sub>α</sub> <sup>E</sup> s <sub>α</sub> <sup>E</sup> | 6.1 | 91.1  | 16.1 | 25.0 | 34.6 | 34.8 | 45.9 | 56.1 | 64.9 | 72.4 | 78.7 | 84.1 | 88.8  | 104.2 |
| 3-Heptyl      | 3s <sub>β</sub> s <sub>β</sub>                           | 6.8 | 97.6  | 19.1 | 27.3 | 36.4 | 36.6 | 47.0 | 56.7 | 65.2 | 72.4 | 78.6 | 83.9 | 88.6  | 103.9 |
| 3-Heptyl      | 4 <sup>c</sup> s <sub>β</sub> s <sub>β</sub>             | 6.5 | 95.9  | 17.9 | 26.1 | 35.5 | 35.7 | 46.5 | 56.6 | 65.2 | 72.6 | 78.8 | 84.2 | 88.8  | 104.1 |
| 3-Heptyl      | 4 <sup>t</sup> s <sub>β</sub> s <sub>β</sub>             | 6.5 | 96.0  | 18.2 | 26.1 | 35.5 | 35.7 | 46.5 | 56.6 | 65.2 | 72.6 | 78.8 | 84.2 | 88.8  | 104.1 |
| 2-Octyl       |                                                          | 7.9 | 108.1 | 22.9 | 31.8 | 42.0 | 42.2 | 54.1 | 65.4 | 75.2 | 83.6 | 90.8 | 97.0 | 102.4 | 120.3 |
| 3-Octyl       |                                                          | 7.9 | 109.0 | 22.5 | 31.7 | 41.9 | 42.1 | 54.1 | 65.4 | 75.2 | 83.6 | 90.8 | 97.0 | 102.4 | 120.3 |
| 4-Octyl       |                                                          | 7.8 | 108.6 | 22.3 | 31.6 | 41.9 | 42.1 | 54.1 | 65.4 | 75.2 | 83.6 | 90.8 | 97.0 | 102.4 | 120.3 |
| 2-Octyl       | 3s <sub>β</sub> s <sub>α</sub>                           | 7.6 | 105.0 | 21.7 | 31.0 | 41.3 | 41.5 | 53.4 | 64.6 | 74.4 | 82.7 | 89.8 | 95.9 | 101.2 | 118.8 |
| 2-Octyl       | 4 <sup>c</sup> s <sub>β</sub> s <sub>α</sub>             | 7.4 | 103.9 | 20.5 | 29.8 | 40.5 | 40.7 | 53.0 | 64.5 | 74.5 | 82.9 | 90.0 | 96.2 | 101.5 | 119.0 |
| 2-Octyl       | 4 <sup>t</sup> s <sub>β</sub> s <sub>α</sub>             | 7.4 | 104.1 | 20.9 | 29.9 | 40.5 | 40.7 | 53.0 | 64.6 | 74.5 | 82.9 | 90.0 | 96.2 | 101.5 | 119.0 |
| 2-Octyl       | 5s <sub>β</sub> <sup>A</sup> s <sub>α</sub> <sup>A</sup> | 7.1 | 100.6 | 19.6 | 28.7 | 39.7 | 39.9 | 52.5 | 64.2 | 74.2 | 82.7 | 89.9 | 96.1 | 101.4 | 119.0 |
| 2-Octyl       | 5s <sub>β</sub> <sup>A</sup> s <sub>α</sub> <sup>E</sup> | 7.1 | 100.7 | 19.4 | 28.8 | 39.7 | 39.9 | 52.5 | 64.2 | 74.2 | 82.7 | 89.9 | 96.1 | 101.4 | 119.0 |
| 2-Octyl       | 5s <sub>β</sub> <sup>E</sup> s <sub>α</sub> <sup>E</sup> | 7.1 | 100.7 | 19.6 | 28.9 | 39.8 | 40.0 | 52.5 | 64.1 | 74.2 | 82.7 | 89.9 | 96.1 | 101.4 | 119.0 |
| 2-Octyl       | 6s <sub>β</sub> <sup>A</sup> s <sub>α</sub> <sup>A</sup> | 6.9 | 98.2  | 18.5 | 28.3 | 39.5 | 39.7 | 52.4 | 64.2 | 74.2 | 82.8 | 90.0 | 96.2 | 101.5 | 119.1 |
| 2-Octyl       | 6s <sub>β</sub> <sup>A</sup> s <sub>α</sub> <sup>E</sup> | 6.9 | 98.5  | 18.6 | 28.4 | 39.5 | 39.7 | 52.4 | 64.1 | 74.2 | 82.7 | 89.9 | 96.1 | 101.5 | 119.1 |
| 2-Octyl       | 6s <sub>β</sub> <sup>E</sup> s <sub>α</sub> <sup>E</sup> | 6.9 | 98.6  | 18.4 | 28.4 | 39.5 | 39.7 | 52.3 | 64.0 | 74.1 | 82.7 | 89.9 | 96.1 | 101.5 | 119.1 |
| 2-Octyl       | 7s <sub>α</sub> <sup>A</sup> s <sub>α</sub> <sup>A</sup> | 6.8 | 97.0  | 18.1 | 28.2 | 39.4 | 39.6 | 52.3 | 64.1 | 74.2 | 82.7 | 89.9 | 96.1 | 101.5 | 119.1 |
| 2-Octyl       | 7s <sub>α</sub> <sup>A</sup> s <sub>α</sub> <sup>E</sup> | 6.8 | 96.9  | 18.0 | 28.3 | 39.4 | 39.7 | 52.3 | 64.1 | 74.2 | 82.7 | 89.9 | 96.1 | 101.5 | 119.1 |
| 2-Octyl       | 7s <sub>α</sub> <sup>E</sup> s <sub>α</sub> <sup>E</sup> | 6.9 | 97.1  | 18.2 | 28.5 | 39.5 | 39.7 | 52.3 | 64.0 | 74.1 | 82.7 | 89.9 | 96.1 | 101.5 | 119.1 |
| 3-Octyl       | 3s <sub>β</sub> s <sub>β</sub>                           | 7.6 | 105.4 | 21.6 | 30.9 | 41.3 | 41.5 | 53.4 | 64.7 | 74.4 | 82.7 | 89.8 | 95.9 | 101.2 | 118.8 |
| 3-Octyl       | 4 <sup>c</sup> s <sub>β</sub> s <sub>β</sub>             | 7.3 | 103.7 | 20.3 | 29.7 | 40.4 | 40.7 | 53.0 | 64.6 | 74.5 | 82.9 | 90.0 | 96.2 | 101.5 | 119.0 |

|         |                                                          |     |       |      |      |      |      |      |      |      |      |      |      |       |       |
|---------|----------------------------------------------------------|-----|-------|------|------|------|------|------|------|------|------|------|------|-------|-------|
| 3-Octyl | 4 <sup>t</sup> S <sub>β</sub> S <sub>β</sub>             | 7.4 | 103.7 | 20.6 | 29.6 | 40.4 | 40.6 | 53.0 | 64.6 | 74.5 | 82.9 | 90.0 | 96.2 | 101.4 | 119.0 |
| 3-Octyl | 5S <sub>β</sub> <sup>A</sup> S <sub>β</sub> <sup>A</sup> | 7.1 | 100.7 | 19.6 | 28.7 | 39.7 | 39.9 | 52.5 | 64.2 | 74.2 | 82.7 | 89.9 | 96.1 | 101.4 | 119.0 |
| 3-Octyl | 5S <sub>β</sub> <sup>A</sup> S <sub>β</sub> <sup>E</sup> | 7.1 | 100.6 | 19.3 | 28.7 | 39.7 | 39.9 | 52.5 | 64.2 | 74.2 | 82.7 | 89.9 | 96.1 | 101.4 | 119.0 |
| 3-Octyl | 5S <sub>β</sub> <sup>E</sup> S <sub>β</sub> <sup>E</sup> | 7.1 | 100.7 | 19.5 | 28.8 | 39.7 | 39.9 | 52.5 | 64.2 | 74.2 | 82.7 | 89.9 | 96.1 | 101.4 | 119.0 |
| 4-Octyl | 3S <sub>β</sub> S <sub>β</sub>                           | 7.6 | 105.4 | 21.6 | 30.9 | 41.3 | 41.5 | 53.5 | 64.7 | 74.4 | 82.7 | 89.8 | 96.0 | 101.2 | 118.8 |



Table S.3: G4 Arrhenius pre-exponential A-factors for the forward and reverse s-alkyl radical H-migrations.

| Alkyl Radical | rxn type                                                 |         | Temperature (K) |         |         |         |         |         |         |         |         |         |         |         |
|---------------|----------------------------------------------------------|---------|-----------------|---------|---------|---------|---------|---------|---------|---------|---------|---------|---------|---------|
|               |                                                          |         | 200             | 300     | 400     | 500     | 600     | 700     | 800     | 900     | 1000    | 1500    | 2000    | 2500    |
| 2-Butyl       | 3 <sub>α</sub> S <sub>α</sub>                            | Forward | 1.7E+12         | 2.1E+12 | 2.5E+12 | 2.8E+12 | 3.1E+12 | 3.4E+12 | 3.7E+12 | 4.0E+12 | 4.2E+12 | 5.2E+12 | 5.9E+12 | 6.5E+12 |
|               |                                                          | Reverse | 1.7E+12         | 2.1E+12 | 2.5E+12 | 2.8E+12 | 3.1E+12 | 3.4E+12 | 3.7E+12 | 4.0E+12 | 4.2E+12 | 5.2E+12 | 5.9E+12 | 6.5E+12 |
| 2-Pentyl      | 3 <sub>β</sub> S <sub>α</sub>                            | Forward | 1.8E+12         | 2.2E+12 | 2.6E+12 | 3.0E+12 | 3.4E+12 | 3.7E+12 | 4.0E+12 | 4.3E+12 | 4.6E+12 | 5.6E+12 | 6.4E+12 | 7.0E+12 |
|               |                                                          | Reverse | 1.4E+12         | 1.8E+12 | 2.1E+12 | 2.4E+12 | 2.7E+12 | 3.0E+12 | 3.3E+12 | 3.5E+12 | 3.8E+12 | 4.7E+12 | 5.4E+12 | 5.9E+12 |
| 2-Pentyl      | 4 <sup>c</sup> S <sub>α</sub> S <sub>α</sub>             | Forward | 1.6E+12         | 1.7E+12 | 1.8E+12 | 1.9E+12 | 2.0E+12 | 2.1E+12 | 2.2E+12 | 2.3E+12 | 2.4E+12 | 2.8E+12 | 3.2E+12 | 3.5E+12 |
|               |                                                          | Reverse | 1.6E+12         | 1.7E+12 | 1.8E+12 | 1.9E+12 | 2.0E+12 | 2.1E+12 | 2.2E+12 | 2.3E+12 | 2.4E+12 | 2.8E+12 | 3.2E+12 | 3.5E+12 |
| 2-Pentyl      | 4 <sup>t</sup> S <sub>α</sub> S <sub>α</sub>             | Forward | 2.0E+12         | 2.2E+12 | 2.4E+12 | 2.6E+12 | 2.8E+12 | 2.9E+12 | 3.1E+12 | 3.3E+12 | 3.4E+12 | 4.2E+12 | 4.7E+12 | 5.2E+12 |
|               |                                                          | Reverse | 2.0E+12         | 2.2E+12 | 2.4E+12 | 2.6E+12 | 2.8E+12 | 2.9E+12 | 3.1E+12 | 3.3E+12 | 3.4E+12 | 4.2E+12 | 4.7E+12 | 5.2E+12 |
| 2-Hexyl       | 3 <sub>β</sub> S <sub>α</sub>                            | Forward | 1.6E+12         | 2.0E+12 | 2.3E+12 | 2.6E+12 | 2.9E+12 | 3.1E+12 | 3.4E+12 | 3.6E+12 | 3.8E+12 | 4.7E+12 | 5.4E+12 | 5.8E+12 |
|               |                                                          | Reverse | 1.3E+12         | 1.7E+12 | 2.0E+12 | 2.4E+12 | 2.7E+12 | 3.0E+12 | 3.2E+12 | 3.5E+12 | 3.7E+12 | 4.6E+12 | 5.3E+12 | 5.8E+12 |
| 2-Hexyl       | 4 <sup>c</sup> S <sub>β</sub> S <sub>α</sub>             | Forward | 1.5E+12         | 1.5E+12 | 1.5E+12 | 1.6E+12 | 1.7E+12 | 1.7E+12 | 1.8E+12 | 1.9E+12 | 2.0E+12 | 2.3E+12 | 2.6E+12 | 2.8E+12 |
|               |                                                          | Reverse | 1.2E+12         | 1.3E+12 | 1.4E+12 | 1.4E+12 | 1.5E+12 | 1.6E+12 | 1.7E+12 | 1.8E+12 | 1.9E+12 | 2.3E+12 | 2.6E+12 | 2.8E+12 |
| 2-Hexyl       | 4 <sup>t</sup> S <sub>β</sub> S <sub>α</sub>             | Forward | 1.7E+12         | 1.8E+12 | 1.9E+12 | 2.0E+12 | 2.1E+12 | 2.2E+12 | 2.3E+12 | 2.5E+12 | 2.6E+12 | 3.1E+12 | 3.5E+12 | 3.8E+12 |
|               |                                                          | Reverse | 1.4E+12         | 1.6E+12 | 1.7E+12 | 1.8E+12 | 2.0E+12 | 2.1E+12 | 2.2E+12 | 2.3E+12 | 2.5E+12 | 3.0E+12 | 3.4E+12 | 3.7E+12 |
| 2-Hexyl       | 5S <sub>α</sub> <sup>A</sup> S <sub>α</sub> <sup>A</sup> | Forward | 5.9E+11         | 5.1E+11 | 4.6E+11 | 4.4E+11 | 4.4E+11 | 4.4E+11 | 4.4E+11 | 4.5E+11 | 4.5E+11 | 5.0E+11 | 5.4E+11 | 5.7E+11 |
|               |                                                          | Reverse | 5.9E+11         | 5.1E+11 | 4.6E+11 | 4.4E+11 | 4.4E+11 | 4.4E+11 | 4.4E+11 | 4.5E+11 | 4.5E+11 | 5.0E+11 | 5.4E+11 | 5.7E+11 |
| 2-Hexyl       | 5S <sub>α</sub> <sup>A</sup> S <sub>α</sub> <sup>F</sup> | Forward | 6.3E+11         | 5.4E+11 | 4.9E+11 | 4.7E+11 | 4.6E+11 | 4.7E+11 | 4.7E+11 | 4.8E+11 | 4.9E+11 | 5.3E+11 | 5.8E+11 | 6.1E+11 |
|               |                                                          | Reverse | 6.3E+11         | 5.4E+11 | 4.9E+11 | 4.7E+11 | 4.6E+11 | 4.7E+11 | 4.7E+11 | 4.8E+11 | 4.9E+11 | 5.3E+11 | 5.8E+11 | 6.1E+11 |
| 2-Hexyl       | 5S <sub>α</sub> <sup>F</sup> S <sub>α</sub> <sup>F</sup> | Forward | 6.2E+11         | 5.4E+11 | 5.0E+11 | 4.8E+11 | 4.7E+11 | 4.8E+11 | 4.8E+11 | 4.9E+11 | 5.0E+11 | 5.5E+11 | 5.9E+11 | 6.3E+11 |
|               |                                                          | Reverse | 6.2E+11         | 5.4E+11 | 5.0E+11 | 4.8E+11 | 4.7E+11 | 4.8E+11 | 4.8E+11 | 4.9E+11 | 5.0E+11 | 5.5E+11 | 5.9E+11 | 6.3E+11 |
| 3-Hexyl       | 3 <sub>β</sub> S <sub>β</sub>                            | Forward | 1.4E+12         | 1.8E+12 | 2.2E+12 | 2.6E+12 | 2.9E+12 | 3.2E+12 | 3.5E+12 | 3.7E+12 | 4.0E+12 | 5.0E+12 | 5.7E+12 | 6.2E+12 |
|               |                                                          | Reverse | 1.4E+12         | 1.8E+12 | 2.2E+12 | 2.6E+12 | 2.9E+12 | 3.2E+12 | 3.5E+12 | 3.7E+12 | 4.0E+12 | 5.0E+12 | 5.7E+12 | 6.2E+12 |
| 2-Heptyl      | 3 <sub>β</sub> S <sub>α</sub>                            | Forward | 1.8E+12         | 2.3E+12 | 2.7E+12 | 3.0E+12 | 3.4E+12 | 3.7E+12 | 4.0E+12 | 4.3E+12 | 4.6E+12 | 5.7E+12 | 6.5E+12 | 7.1E+12 |
|               |                                                          | Reverse | 1.1E+12         | 1.5E+12 | 1.7E+12 | 2.0E+12 | 2.2E+12 | 2.5E+12 | 2.7E+12 | 2.9E+12 | 3.0E+12 | 3.8E+12 | 4.3E+12 | 4.7E+12 |
| 2-Heptyl      | 4 <sup>c</sup> S <sub>β</sub> S <sub>α</sub>             | Forward | 1.7E+12         | 1.8E+12 | 1.8E+12 | 1.9E+12 | 2.0E+12 | 2.1E+12 | 2.2E+12 | 2.3E+12 | 2.4E+12 | 2.9E+12 | 3.2E+12 | 3.5E+12 |
|               |                                                          | Reverse | 1.2E+12         | 1.3E+12 | 1.4E+12 | 1.5E+12 | 1.6E+12 | 1.7E+12 | 1.8E+12 | 1.9E+12 | 2.0E+12 | 2.4E+12 | 2.7E+12 | 2.9E+12 |
| 2-Heptyl      | 4 <sup>t</sup> S <sub>β</sub> S <sub>α</sub>             | Forward | 2.0E+12         | 2.1E+12 | 2.3E+12 | 2.4E+12 | 2.5E+12 | 2.7E+12 | 2.8E+12 | 3.0E+12 | 3.1E+12 | 3.8E+12 | 4.3E+12 | 4.6E+12 |
|               |                                                          | Reverse | 1.4E+12         | 1.6E+12 | 1.7E+12 | 1.9E+12 | 2.0E+12 | 2.2E+12 | 2.3E+12 | 2.4E+12 | 2.5E+12 | 3.1E+12 | 3.5E+12 | 3.9E+12 |
| 2-Heptyl      | 5S <sub>β</sub> <sup>A</sup> S <sub>α</sub> <sup>A</sup> | Forward | 6.6E+11         | 5.7E+11 | 5.2E+11 | 5.0E+11 | 4.9E+11 | 4.9E+11 | 4.9E+11 | 5.0E+11 | 5.1E+11 | 5.6E+11 | 6.0E+11 | 6.4E+11 |
|               |                                                          | Reverse | 4.1E+11         | 3.6E+11 | 3.4E+11 | 3.2E+11 | 3.2E+11 | 3.2E+11 | 3.3E+11 | 3.3E+11 | 3.4E+11 | 3.7E+11 | 4.0E+11 | 4.3E+11 |
| 2-Heptyl      | 5S <sub>β</sub> <sup>A</sup> S <sub>α</sub> <sup>F</sup> | Forward | 7.2E+11         | 6.2E+11 | 5.7E+11 | 5.4E+11 | 5.4E+11 | 5.4E+11 | 5.4E+11 | 5.5E+11 | 5.6E+11 | 6.2E+11 | 6.7E+11 | 7.1E+11 |
|               |                                                          | Reverse | 4.5E+11         | 4.0E+11 | 3.7E+11 | 3.6E+11 | 3.5E+11 | 3.5E+11 | 3.6E+11 | 3.6E+11 | 3.7E+11 | 4.1E+11 | 4.5E+11 | 4.7E+11 |

|          |                                                         |         |         |         |         |         |         |         |         |         |         |         |         |         |
|----------|---------------------------------------------------------|---------|---------|---------|---------|---------|---------|---------|---------|---------|---------|---------|---------|---------|
| 2-Heptyl | 5 <sub>β</sub> <sup>F</sup> S <sub>α</sub> <sup>F</sup> | Forward | 6.6E+11 | 5.7E+11 | 5.3E+11 | 5.1E+11 | 5.0E+11 | 5.0E+11 | 5.0E+11 | 5.1E+11 | 5.2E+11 | 5.7E+11 | 6.2E+11 | 6.6E+11 |
|          |                                                         | Reverse | 4.2E+11 | 3.7E+11 | 3.4E+11 | 3.3E+11 | 3.3E+11 | 3.3E+11 | 3.3E+11 | 3.4E+11 | 3.5E+11 | 3.8E+11 | 4.1E+11 | 4.4E+11 |
| 2-Heptyl | 6 <sub>α</sub> <sup>A</sup> S <sub>α</sub> <sup>A</sup> | Forward | 3.1E+11 | 2.4E+11 | 2.0E+11 | 1.8E+11 | 1.7E+11 | 1.7E+11 | 1.7E+11 | 1.7E+11 | 1.7E+11 | 1.8E+11 | 2.0E+11 | 2.1E+11 |
|          |                                                         | Reverse | 3.1E+11 | 2.4E+11 | 2.0E+11 | 1.8E+11 | 1.7E+11 | 1.7E+11 | 1.7E+11 | 1.7E+11 | 1.7E+11 | 1.8E+11 | 2.0E+11 | 2.1E+11 |
| 2-Heptyl | 6 <sub>α</sub> <sup>A</sup> S <sub>α</sub> <sup>F</sup> | Forward | 3.4E+11 | 2.6E+11 | 2.2E+11 | 2.0E+11 | 2.0E+11 | 1.9E+11 | 1.9E+11 | 1.9E+11 | 1.9E+11 | 2.1E+11 | 2.2E+11 | 2.3E+11 |
|          |                                                         | Reverse | 3.4E+11 | 2.6E+11 | 2.2E+11 | 2.0E+11 | 2.0E+11 | 1.9E+11 | 1.9E+11 | 1.9E+11 | 1.9E+11 | 2.1E+11 | 2.2E+11 | 2.3E+11 |
| 2-Heptyl | 6 <sub>α</sub> <sup>F</sup> S <sub>α</sub> <sup>F</sup> | Forward | 3.6E+11 | 2.8E+11 | 2.4E+11 | 2.2E+11 | 2.1E+11 | 2.0E+11 | 2.0E+11 | 2.0E+11 | 2.0E+11 | 2.1E+11 | 2.3E+11 | 2.4E+11 |
|          |                                                         | Reverse | 3.6E+11 | 2.8E+11 | 2.4E+11 | 2.2E+11 | 2.1E+11 | 2.0E+11 | 2.0E+11 | 2.0E+11 | 2.0E+11 | 2.1E+11 | 2.3E+11 | 2.4E+11 |
| 3-Heptyl | 3 <sub>β</sub> S <sub>β</sub>                           | Forward | 1.2E+12 | 1.5E+12 | 1.8E+12 | 2.1E+12 | 2.3E+12 | 2.5E+12 | 2.7E+12 | 2.9E+12 | 3.1E+12 | 3.9E+12 | 4.4E+12 | 4.8E+12 |
|          |                                                         | Reverse | 1.4E+12 | 1.8E+12 | 2.1E+12 | 2.5E+12 | 2.8E+12 | 3.1E+12 | 3.3E+12 | 3.6E+12 | 3.8E+12 | 4.8E+12 | 5.5E+12 | 6.0E+12 |
| 3-Heptyl | 4 <sup>c</sup> S <sub>β</sub> S <sub>β</sub>            | Forward | 1.0E+12 | 1.0E+12 | 1.1E+12 | 1.1E+12 | 1.2E+12 | 1.2E+12 | 1.3E+12 | 1.4E+12 | 1.4E+12 | 1.7E+12 | 1.9E+12 | 2.0E+12 |
|          |                                                         | Reverse | 1.0E+12 | 1.0E+12 | 1.1E+12 | 1.1E+12 | 1.2E+12 | 1.2E+12 | 1.3E+12 | 1.4E+12 | 1.4E+12 | 1.7E+12 | 1.9E+12 | 2.0E+12 |
| 3-Heptyl | 4 <sup>t</sup> S <sub>β</sub> S <sub>β</sub>            | Forward | 9.7E+11 | 1.0E+12 | 1.1E+12 | 1.1E+12 | 1.2E+12 | 1.2E+12 | 1.3E+12 | 1.4E+12 | 1.4E+12 | 1.7E+12 | 1.9E+12 | 2.1E+12 |
|          |                                                         | Reverse | 9.7E+11 | 1.0E+12 | 1.1E+12 | 1.1E+12 | 1.2E+12 | 1.2E+12 | 1.3E+12 | 1.4E+12 | 1.4E+12 | 1.7E+12 | 1.9E+12 | 2.1E+12 |
| 2-Octyl  | 3 <sub>β</sub> S <sub>α</sub>                           | Forward | 1.7E+12 | 2.0E+12 | 2.4E+12 | 2.7E+12 | 3.0E+12 | 3.3E+12 | 3.6E+12 | 3.8E+12 | 4.1E+12 | 5.0E+12 | 5.7E+12 | 6.2E+12 |
|          |                                                         | Reverse | 9.9E+11 | 1.2E+12 | 1.5E+12 | 1.7E+12 | 1.9E+12 | 2.1E+12 | 2.3E+12 | 2.4E+12 | 2.6E+12 | 3.2E+12 | 3.6E+12 | 4.0E+12 |
| 2-Octyl  | 4 <sup>c</sup> S <sub>β</sub> S <sub>α</sub>            | Forward | 1.8E+12 | 1.8E+12 | 1.9E+12 | 2.0E+12 | 2.0E+12 | 2.1E+12 | 2.3E+12 | 2.4E+12 | 2.5E+12 | 2.9E+12 | 3.3E+12 | 3.6E+12 |
|          |                                                         | Reverse | 1.1E+12 | 1.2E+12 | 1.3E+12 | 1.4E+12 | 1.5E+12 | 1.6E+12 | 1.7E+12 | 1.8E+12 | 1.9E+12 | 2.2E+12 | 2.5E+12 | 2.8E+12 |
| 2-Octyl  | 4 <sup>t</sup> S <sub>β</sub> S <sub>α</sub>            | Forward | 1.8E+12 | 1.9E+12 | 2.0E+12 | 2.1E+12 | 2.2E+12 | 2.3E+12 | 2.5E+12 | 2.6E+12 | 2.7E+12 | 3.3E+12 | 3.7E+12 | 4.0E+12 |
|          |                                                         | Reverse | 1.2E+12 | 1.3E+12 | 1.4E+12 | 1.5E+12 | 1.6E+12 | 1.7E+12 | 1.8E+12 | 1.9E+12 | 2.0E+12 | 2.5E+12 | 2.8E+12 | 3.1E+12 |
| 2-Octyl  | 5 <sub>β</sub> <sup>A</sup> S <sub>α</sub> <sup>A</sup> | Forward | 6.4E+11 | 5.5E+11 | 5.0E+11 | 4.8E+11 | 4.7E+11 | 4.7E+11 | 4.7E+11 | 4.8E+11 | 4.8E+11 | 5.3E+11 | 5.7E+11 | 6.1E+11 |
|          |                                                         | Reverse | 4.2E+11 | 3.8E+11 | 3.5E+11 | 3.4E+11 | 3.4E+11 | 3.4E+11 | 3.5E+11 | 3.6E+11 | 3.6E+11 | 4.0E+11 | 4.4E+11 | 4.7E+11 |
| 2-Octyl  | 5 <sub>β</sub> <sup>A</sup> S <sub>α</sub> <sup>F</sup> | Forward | 6.9E+11 | 5.9E+11 | 5.3E+11 | 5.1E+11 | 5.0E+11 | 5.0E+11 | 5.0E+11 | 5.1E+11 | 5.2E+11 | 5.7E+11 | 6.1E+11 | 6.5E+11 |
|          |                                                         | Reverse | 4.5E+11 | 4.1E+11 | 3.8E+11 | 3.7E+11 | 3.7E+11 | 3.7E+11 | 3.7E+11 | 3.8E+11 | 3.9E+11 | 4.3E+11 | 4.7E+11 | 5.0E+11 |
| 2-Octyl  | 5 <sub>β</sub> <sup>F</sup> S <sub>α</sub> <sup>F</sup> | Forward | 6.6E+11 | 5.7E+11 | 5.2E+11 | 5.0E+11 | 4.9E+11 | 4.9E+11 | 5.0E+11 | 5.1E+11 | 5.1E+11 | 5.7E+11 | 6.1E+11 | 6.5E+11 |
|          |                                                         | Reverse | 4.3E+11 | 3.9E+11 | 3.7E+11 | 3.6E+11 | 3.6E+11 | 3.7E+11 | 3.7E+11 | 3.8E+11 | 3.9E+11 | 4.3E+11 | 4.7E+11 | 5.0E+11 |
| 2-Octyl  | 6 <sub>β</sub> <sup>A</sup> S <sub>α</sub> <sup>A</sup> | Forward | 3.0E+11 | 2.2E+11 | 1.9E+11 | 1.7E+11 | 1.6E+11 | 1.6E+11 | 1.5E+11 | 1.5E+11 | 1.6E+11 | 1.7E+11 | 1.8E+11 | 1.9E+11 |
|          |                                                         | Reverse | 1.8E+11 | 1.3E+11 | 1.1E+11 | 1.0E+11 | 1.0E+11 | 9.8E+10 | 9.7E+10 | 9.7E+10 | 9.8E+10 | 1.1E+11 | 1.1E+11 | 1.2E+11 |
| 2-Octyl  | 6 <sub>β</sub> <sup>A</sup> S <sub>α</sub> <sup>F</sup> | Forward | 3.3E+11 | 2.5E+11 | 2.1E+11 | 1.9E+11 | 1.8E+11 | 1.8E+11 | 1.7E+11 | 1.7E+11 | 1.8E+11 | 1.9E+11 | 2.0E+11 | 2.1E+11 |
|          |                                                         | Reverse | 2.0E+11 | 1.5E+11 | 1.3E+11 | 1.2E+11 | 1.1E+11 | 1.1E+11 | 1.1E+11 | 1.1E+11 | 1.1E+11 | 1.2E+11 | 1.3E+11 | 1.3E+11 |
| 2-Octyl  | 6 <sub>β</sub> <sup>F</sup> S <sub>α</sub> <sup>F</sup> | Forward | 3.5E+11 | 2.6E+11 | 2.2E+11 | 2.0E+11 | 1.9E+11 | 1.9E+11 | 1.8E+11 | 1.8E+11 | 1.8E+11 | 2.0E+11 | 2.1E+11 | 2.2E+11 |
|          |                                                         | Reverse | 2.1E+11 | 1.6E+11 | 1.4E+11 | 1.3E+11 | 1.2E+11 | 1.2E+11 | 1.2E+11 | 1.2E+11 | 1.2E+11 | 1.2E+11 | 1.3E+11 | 1.4E+11 |
| 2-Octyl  | 7 <sub>α</sub> <sup>A</sup> S <sub>α</sub> <sup>A</sup> | Forward | 2.0E+11 | 1.4E+11 | 1.2E+11 | 1.0E+11 | 9.6E+10 | 9.2E+10 | 9.0E+10 | 9.0E+10 | 9.0E+10 | 9.4E+10 | 1.0E+11 | 1.0E+11 |
|          |                                                         | Reverse | 2.0E+11 | 1.4E+11 | 1.2E+11 | 1.0E+11 | 9.6E+10 | 9.2E+10 | 9.0E+10 | 9.0E+10 | 9.0E+10 | 9.4E+10 | 1.0E+11 | 1.0E+11 |
| 2-Octyl  | 7 <sub>α</sub> <sup>A</sup> S <sub>α</sub> <sup>F</sup> | Forward | 1.9E+11 | 1.3E+11 | 1.1E+11 | 9.4E+10 | 8.8E+10 | 8.4E+10 | 8.3E+10 | 8.2E+10 | 8.2E+10 | 8.6E+10 | 9.1E+10 | 9.6E+10 |
|          |                                                         | Reverse | 1.9E+11 | 1.3E+11 | 1.1E+11 | 9.4E+10 | 8.8E+10 | 8.4E+10 | 8.3E+10 | 8.2E+10 | 8.2E+10 | 8.6E+10 | 9.1E+10 | 9.6E+10 |
| 2-Octyl  | 7 <sub>α</sub> <sup>F</sup> S <sub>α</sub> <sup>F</sup> | Forward | 1.9E+11 | 1.4E+11 | 1.1E+11 | 1.0E+11 | 9.4E+10 | 9.1E+10 | 9.0E+10 | 8.9E+10 | 9.0E+10 | 9.4E+10 | 1.0E+11 | 1.1E+11 |

|         |                                                          |         |         |         |         |         |         |         |         |         |         |         |         |         |
|---------|----------------------------------------------------------|---------|---------|---------|---------|---------|---------|---------|---------|---------|---------|---------|---------|---------|
|         |                                                          | Reverse | 1.9E+11 | 1.4E+11 | 1.1E+11 | 1.0E+11 | 9.4E+10 | 9.1E+10 | 9.0E+10 | 8.9E+10 | 9.0E+10 | 9.4E+10 | 1.0E+11 | 1.1E+11 |
| 3-Octyl | 3 <sub>Sβ</sub> S <sub>β</sub>                           | Forward | 1.2E+12 | 1.5E+12 | 1.8E+12 | 2.0E+12 | 2.3E+12 | 2.5E+12 | 2.7E+12 | 2.9E+12 | 3.1E+12 | 3.9E+12 | 4.4E+12 | 4.8E+12 |
|         |                                                          | Reverse | 1.3E+12 | 1.7E+12 | 2.1E+12 | 2.4E+12 | 2.7E+12 | 3.0E+12 | 3.2E+12 | 3.5E+12 | 3.7E+12 | 4.6E+12 | 5.3E+12 | 5.8E+12 |
| 3-Octyl | 4 <sup>c</sup> S <sub>β</sub> S <sub>β</sub>             | Forward | 1.0E+12 | 1.1E+12 | 1.1E+12 | 1.2E+12 | 1.2E+12 | 1.3E+12 | 1.3E+12 | 1.4E+12 | 1.5E+12 | 1.7E+12 | 2.0E+12 | 2.1E+12 |
|         |                                                          | Reverse | 1.1E+12 | 1.2E+12 | 1.3E+12 | 1.3E+12 | 1.4E+12 | 1.5E+12 | 1.6E+12 | 1.7E+12 | 1.7E+12 | 2.1E+12 | 2.4E+12 | 2.6E+12 |
| 3-Octyl | 4 <sup>l</sup> S <sub>β</sub> S <sub>β</sub>             | Forward | 9.7E+11 | 1.0E+12 | 1.1E+12 | 1.1E+12 | 1.2E+12 | 1.2E+12 | 1.3E+12 | 1.4E+12 | 1.4E+12 | 1.7E+12 | 1.9E+12 | 2.1E+12 |
|         |                                                          | Reverse | 1.1E+12 | 1.2E+12 | 1.2E+12 | 1.3E+12 | 1.4E+12 | 1.5E+12 | 1.5E+12 | 1.6E+12 | 1.7E+12 | 2.0E+12 | 2.3E+12 | 2.5E+12 |
| 3-Octyl | 5 <sub>Sβ</sub> <sup>A</sup> S <sub>β</sub> <sup>A</sup> | Forward | 4.1E+11 | 3.6E+11 | 3.3E+11 | 3.2E+11 | 3.1E+11 | 3.1E+11 | 3.2E+11 | 3.2E+11 | 3.3E+11 | 3.6E+11 | 3.9E+11 | 4.2E+11 |
|         |                                                          | Reverse | 4.1E+11 | 3.6E+11 | 3.3E+11 | 3.2E+11 | 3.1E+11 | 3.1E+11 | 3.2E+11 | 3.2E+11 | 3.3E+11 | 3.6E+11 | 3.9E+11 | 4.2E+11 |
| 3-Octyl | 5 <sub>Sβ</sub> <sup>A</sup> S <sub>β</sub> <sup>E</sup> | Forward | 4.0E+11 | 3.5E+11 | 3.2E+11 | 3.0E+11 | 3.0E+11 | 3.0E+11 | 3.0E+11 | 3.1E+11 | 3.1E+11 | 3.4E+11 | 3.7E+11 | 4.0E+11 |
|         |                                                          | Reverse | 4.0E+11 | 3.5E+11 | 3.2E+11 | 3.0E+11 | 3.0E+11 | 3.0E+11 | 3.0E+11 | 3.1E+11 | 3.1E+11 | 3.4E+11 | 3.7E+11 | 4.0E+11 |
| 3-Octyl | 5 <sub>Sβ</sub> <sup>F</sup> S <sub>β</sub> <sup>E</sup> | Forward | 4.0E+11 | 3.5E+11 | 3.2E+11 | 3.1E+11 | 3.0E+11 | 3.0E+11 | 3.1E+11 | 3.1E+11 | 3.2E+11 | 3.5E+11 | 3.8E+11 | 4.0E+11 |
|         |                                                          | Reverse | 4.0E+11 | 3.5E+11 | 3.2E+11 | 3.1E+11 | 3.0E+11 | 3.0E+11 | 3.1E+11 | 3.1E+11 | 3.2E+11 | 3.5E+11 | 3.8E+11 | 4.0E+11 |
| 4-Octyl | 3 <sub>Sβ</sub> S <sub>β</sub>                           | Forward | 1.3E+12 | 1.7E+12 | 2.1E+12 | 2.4E+12 | 2.7E+12 | 3.0E+12 | 3.3E+12 | 3.6E+12 | 3.8E+12 | 4.8E+12 | 5.5E+12 | 6.0E+12 |
|         |                                                          | Reverse | 1.3E+12 | 1.7E+12 | 2.1E+12 | 2.4E+12 | 2.7E+12 | 3.0E+12 | 3.3E+12 | 3.6E+12 | 3.8E+12 | 4.8E+12 | 5.5E+12 | 6.0E+12 |

Table S.4: Skodje and Truhlar tunneling transmission coefficient for s-alkyl radical H-migrations, determined using G4 frequencies and energy values.

| Alkyl radical | rxn type                                                 |         | Temperature (K) |         |       |      |     |     |     |     |      |      |      |      |
|---------------|----------------------------------------------------------|---------|-----------------|---------|-------|------|-----|-----|-----|-----|------|------|------|------|
|               |                                                          |         | 200             | 300     | 400   | 500  | 600 | 700 | 800 | 900 | 1000 | 1500 | 2000 | 2500 |
| 2-Butyl       | 3s <sub>α</sub> s <sub>α</sub>                           | Forward | 1.3E+24         | 8.1E+09 | 1552  | 8.2  | 3.2 | 2.2 | 1.8 | 1.6 | 1.4  | 1.2  | 1.1  | 1.1  |
|               |                                                          | Reverse | 1.3E+24         | 8.1E+09 | 1552  | 8.2  | 3.2 | 2.2 | 1.8 | 1.6 | 1.4  | 1.2  | 1.1  | 1.1  |
| 2-Pentyl      | 3s <sub>β</sub> s <sub>α</sub>                           | Forward | 4.5E+23         | 5.0E+09 | 1307  | 8.1  | 3.2 | 2.2 | 1.8 | 1.6 | 1.4  | 1.2  | 1.1  | 1.1  |
|               |                                                          | Reverse | 4.5E+23         | 5.0E+09 | 1307  | 8.1  | 3.2 | 2.2 | 1.8 | 1.6 | 1.4  | 1.2  | 1.1  | 1.1  |
| 2-Pentyl      | 4 <sup>c</sup> s <sub>α</sub> s <sub>α</sub>             | Forward | 1.5E+26         | 3.8E+11 | 34549 | 20.9 | 4.4 | 2.6 | 2.0 | 1.7 | 1.5  | 1.2  | 1.1  | 1.1  |
|               |                                                          | Reverse | 1.5E+26         | 3.8E+11 | 34549 | 20.9 | 4.4 | 2.6 | 2.0 | 1.7 | 1.5  | 1.2  | 1.1  | 1.1  |
| 2-Pentyl      | 4 <sup>t</sup> s <sub>α</sub> s <sub>α</sub>             | Forward | 8.0E+25         | 2.7E+11 | 27974 | 19.7 | 4.3 | 2.6 | 2.0 | 1.7 | 1.5  | 1.2  | 1.1  | 1.1  |
|               |                                                          | Reverse | 8.0E+25         | 2.7E+11 | 27974 | 19.7 | 4.3 | 2.6 | 2.0 | 1.7 | 1.5  | 1.2  | 1.1  | 1.1  |
| 2-Hexyl       | 3s <sub>β</sub> s <sub>α</sub>                           | Forward | 3.9E+23         | 4.7E+09 | 1281  | 8.1  | 3.2 | 2.2 | 1.8 | 1.6 | 1.4  | 1.2  | 1.1  | 1.1  |
|               |                                                          | Reverse | 3.9E+23         | 4.7E+09 | 1281  | 8.1  | 3.2 | 2.2 | 1.8 | 1.6 | 1.4  | 1.2  | 1.1  | 1.1  |
| 2-Hexyl       | 4 <sup>c</sup> s <sub>β</sub> s <sub>α</sub>             | Forward | 3.0E+25         | 1.8E+11 | 25433 | 20.0 | 4.3 | 2.6 | 2.0 | 1.7 | 1.5  | 1.2  | 1.1  | 1.1  |
|               |                                                          | Reverse | 3.0E+25         | 1.8E+11 | 25433 | 20.0 | 4.3 | 2.6 | 2.0 | 1.7 | 1.5  | 1.2  | 1.1  | 1.1  |
| 2-Hexyl       | 4 <sup>t</sup> s <sub>β</sub> s <sub>α</sub>             | Forward | 1.6E+25         | 1.3E+11 | 20359 | 18.6 | 4.2 | 2.6 | 2.0 | 1.7 | 1.5  | 1.2  | 1.1  | 1.1  |
|               |                                                          | Reverse | 1.6E+25         | 1.3E+11 | 20359 | 18.6 | 4.2 | 2.6 | 2.0 | 1.7 | 1.5  | 1.2  | 1.1  | 1.1  |
| 2-Hexyl       | 5s <sub>α</sub> <sup>A</sup> s <sub>α</sub> <sup>A</sup> | Forward | 2.1E+14         | 4.5E+05 | 71    | 5.4  | 2.7 | 2.0 | 1.7 | 1.5 | 1.4  | 1.1  | 1.1  | 1.0  |
|               |                                                          | Reverse | 2.1E+14         | 4.5E+05 | 71    | 5.4  | 2.7 | 2.0 | 1.7 | 1.5 | 1.4  | 1.1  | 1.1  | 1.0  |
| 2-Hexyl       | 5s <sub>α</sub> <sup>A</sup> s <sub>α</sub> <sup>E</sup> | Forward | 2.3E+14         | 5.2E+05 | 80    | 5.7  | 2.8 | 2.0 | 1.7 | 1.5 | 1.4  | 1.1  | 1.1  | 1.0  |
|               |                                                          | Reverse | 2.3E+14         | 5.2E+05 | 80    | 5.7  | 2.8 | 2.0 | 1.7 | 1.5 | 1.4  | 1.1  | 1.1  | 1.0  |
| 2-Hexyl       | 5s <sub>α</sub> <sup>E</sup> s <sub>α</sub> <sup>E</sup> | Forward | 1.8E+14         | 4.9E+05 | 80    | 5.7  | 2.8 | 2.0 | 1.7 | 1.5 | 1.4  | 1.1  | 1.1  | 1.0  |
|               |                                                          | Reverse | 1.8E+14         | 4.9E+05 | 80    | 5.7  | 2.8 | 2.0 | 1.7 | 1.5 | 1.4  | 1.1  | 1.1  | 1.0  |
| 3-Hexyl       | 3s <sub>β</sub> s <sub>β</sub>                           | Forward | 6.5E+23         | 5.4E+09 | 1249  | 7.9  | 3.2 | 2.2 | 1.8 | 1.5 | 1.4  | 1.2  | 1.1  | 1.1  |
|               |                                                          | Reverse | 6.5E+23         | 5.4E+09 | 1249  | 7.9  | 3.2 | 2.2 | 1.8 | 1.5 | 1.4  | 1.2  | 1.1  | 1.1  |
| 2-Heptyl      | 3s <sub>β</sub> s <sub>α</sub>                           | Forward | 5.1E+23         | 5.2E+09 | 1321  | 8.1  | 3.2 | 2.2 | 1.8 | 1.6 | 1.4  | 1.2  | 1.1  | 1.1  |
|               |                                                          | Reverse | 5.1E+23         | 5.2E+09 | 1321  | 8.1  | 3.2 | 2.2 | 1.8 | 1.6 | 1.4  | 1.2  | 1.1  | 1.1  |
| 2-Heptyl      | 4 <sup>c</sup> s <sub>β</sub> s <sub>α</sub>             | Forward | 2.8E+25         | 1.8E+11 | 25124 | 19.9 | 4.3 | 2.6 | 2.0 | 1.7 | 1.5  | 1.2  | 1.1  | 1.1  |
|               |                                                          | Reverse | 2.8E+25         | 1.8E+11 | 25124 | 19.9 | 4.3 | 2.6 | 2.0 | 1.7 | 1.5  | 1.2  | 1.1  | 1.1  |
| 2-Heptyl      | 4 <sup>t</sup> s <sub>β</sub> s <sub>α</sub>             | Forward | 1.6E+25         | 1.3E+11 | 20411 | 18.7 | 4.2 | 2.6 | 2.0 | 1.7 | 1.5  | 1.2  | 1.1  | 1.1  |
|               |                                                          | Reverse | 1.6E+25         | 1.3E+11 | 20411 | 18.7 | 4.2 | 2.6 | 2.0 | 1.7 | 1.5  | 1.2  | 1.1  | 1.1  |
| 2-Heptyl      | 5s <sub>β</sub> <sup>A</sup> s <sub>α</sub> <sup>A</sup> | Forward | 5.5E+13         | 2.6E+05 | 62    | 5.3  | 2.7 | 2.0 | 1.6 | 1.5 | 1.4  | 1.1  | 1.1  | 1.0  |
|               |                                                          | Reverse | 5.5E+13         | 2.6E+05 | 62    | 5.3  | 2.7 | 2.0 | 1.6 | 1.5 | 1.4  | 1.1  | 1.1  | 1.0  |
| 2-Heptyl      | 5s <sub>β</sub> <sup>A</sup> s <sub>α</sub> <sup>E</sup> | Forward | 6.0E+13         | 3.1E+05 | 71    | 5.6  | 2.8 | 2.0 | 1.7 | 1.5 | 1.4  | 1.1  | 1.1  | 1.0  |
|               |                                                          | Reverse | 6.0E+13         | 3.1E+05 | 71    | 5.6  | 2.8 | 2.0 | 1.7 | 1.5 | 1.4  | 1.1  | 1.1  | 1.0  |
| 2-Heptyl      | 5s <sub>β</sub> <sup>E</sup> s <sub>α</sub> <sup>E</sup> | Forward | 5.9E+13         | 3.1E+05 | 72    | 5.6  | 2.8 | 2.0 | 1.7 | 1.5 | 1.4  | 1.1  | 1.1  | 1.0  |
|               |                                                          | Reverse | 5.9E+13         | 3.1E+05 | 72    | 5.6  | 2.8 | 2.0 | 1.7 | 1.5 | 1.4  | 1.1  | 1.1  | 1.0  |
| 2-Heptyl      | 6s <sub>α</sub> <sup>A</sup> s <sub>α</sub> <sup>A</sup> | Forward | 5.4E+09         | 3.9E+03 | 16    | 3.8  | 2.3 | 1.8 | 1.5 | 1.4 | 1.3  | 1.1  | 1.1  | 1.0  |
|               |                                                          | Reverse | 5.4E+09         | 3.9E+03 | 16    | 3.8  | 2.3 | 1.8 | 1.5 | 1.4 | 1.3  | 1.1  | 1.1  | 1.0  |
| 2-Heptyl      | 6s <sub>α</sub> <sup>A</sup> s <sub>α</sub> <sup>E</sup> | Forward | 4.3E+09         | 3.7E+03 | 17    | 3.8  | 2.3 | 1.8 | 1.5 | 1.4 | 1.3  | 1.1  | 1.1  | 1.0  |
|               |                                                          | Reverse | 4.3E+09         | 3.7E+03 | 17    | 3.8  | 2.3 | 1.8 | 1.5 | 1.4 | 1.3  | 1.1  | 1.1  | 1.0  |
| 2-Heptyl      | 6s <sub>α</sub> <sup>E</sup> s <sub>α</sub> <sup>E</sup> | Forward | 5.7E+09         | 4.4E+03 | 18    | 3.9  | 2.3 | 1.8 | 1.5 | 1.4 | 1.3  | 1.1  | 1.1  | 1.0  |
|               |                                                          | Reverse | 5.7E+09         | 4.4E+03 | 18    | 3.9  | 2.3 | 1.8 | 1.5 | 1.4 | 1.3  | 1.1  | 1.1  | 1.0  |
| 3-Heptyl      | 3s <sub>β</sub> s <sub>β</sub>                           | Forward | 5.6E+23         | 5.1E+09 | 1227  | 7.9  | 3.2 | 2.2 | 1.8 | 1.5 | 1.4  | 1.2  | 1.1  | 1.1  |
|               |                                                          | Reverse | 5.6E+23         | 5.1E+09 | 1227  | 7.9  | 3.2 | 2.2 | 1.8 | 1.5 | 1.4  | 1.2  | 1.1  | 1.1  |
| 3-Heptyl      | 4 <sup>c</sup> s <sub>β</sub> s <sub>β</sub>             | Forward | 3.7E+25         | 1.9E+11 | 24120 | 19.2 | 4.3 | 2.6 | 2.0 | 1.7 | 1.5  | 1.2  | 1.1  | 1.1  |
|               |                                                          | Reverse | 3.7E+25         | 1.9E+11 | 24120 | 19.2 | 4.3 | 2.6 | 2.0 | 1.7 | 1.5  | 1.2  | 1.1  | 1.1  |
| 3-Heptyl      | 4 <sup>t</sup> s <sub>β</sub> s <sub>β</sub>             | Forward | 3.8E+25         | 1.8E+11 | 21900 | 18.3 | 4.2 | 2.6 | 2.0 | 1.7 | 1.5  | 1.2  | 1.1  | 1.1  |

|         |                                                          |         |         |         |       |      |     |     |     |     |     |     |     |     |
|---------|----------------------------------------------------------|---------|---------|---------|-------|------|-----|-----|-----|-----|-----|-----|-----|-----|
|         |                                                          | Reverse | 3.8E+25 | 1.8E+11 | 21900 | 18.3 | 4.2 | 2.6 | 2.0 | 1.7 | 1.5 | 1.2 | 1.1 | 1.1 |
| 2-Octyl | 3 <sub>β</sub> S <sub>α</sub>                            | Forward | 1.2E+24 | 7.3E+09 | 1422  | 8.1  | 3.2 | 2.2 | 1.8 | 1.6 | 1.4 | 1.2 | 1.1 | 1.1 |
|         |                                                          | Reverse | 1.2E+24 | 7.3E+09 | 1422  | 8.1  | 3.2 | 2.2 | 1.8 | 1.6 | 1.4 | 1.2 | 1.1 | 1.1 |
| 2-Octyl | 4 <sup>c</sup> S <sub>β</sub> S <sub>α</sub>             | Forward | 3.3E+25 | 1.9E+11 | 25831 | 20.0 | 4.3 | 2.6 | 2.0 | 1.7 | 1.5 | 1.2 | 1.1 | 1.1 |
|         |                                                          | Reverse | 3.3E+25 | 1.9E+11 | 25831 | 20.0 | 4.3 | 2.6 | 2.0 | 1.7 | 1.5 | 1.2 | 1.1 | 1.1 |
| 2-Octyl | 4 <sup>t</sup> S <sub>β</sub> S <sub>α</sub>             | Forward | 2.0E+25 | 1.4E+11 | 21301 | 18.8 | 4.2 | 2.6 | 2.0 | 1.7 | 1.5 | 1.2 | 1.1 | 1.1 |
|         |                                                          | Reverse | 2.0E+25 | 1.4E+11 | 21301 | 18.8 | 4.2 | 2.6 | 2.0 | 1.7 | 1.5 | 1.2 | 1.1 | 1.1 |
| 2-Octyl | 5S <sub>β</sub> <sup>A</sup> S <sub>α</sub> <sup>A</sup> | Forward | 4.0E+13 | 2.4E+05 | 62    | 5.4  | 2.7 | 2.0 | 1.7 | 1.5 | 1.4 | 1.1 | 1.1 | 1.0 |
|         |                                                          | Reverse | 4.0E+13 | 2.4E+05 | 62    | 5.4  | 2.7 | 2.0 | 1.7 | 1.5 | 1.4 | 1.1 | 1.1 | 1.0 |
| 2-Octyl | 5S <sub>β</sub> <sup>A</sup> S <sub>α</sub> <sup>F</sup> | Forward | 4.3E+13 | 2.7E+05 | 69    | 5.6  | 2.8 | 2.0 | 1.7 | 1.5 | 1.4 | 1.1 | 1.1 | 1.0 |
|         |                                                          | Reverse | 4.3E+13 | 2.7E+05 | 69    | 5.6  | 2.8 | 2.0 | 1.7 | 1.5 | 1.4 | 1.1 | 1.1 | 1.0 |
| 2-Octyl | 5S <sub>β</sub> <sup>E</sup> S <sub>α</sub> <sup>F</sup> | Forward | 4.4E+13 | 2.8E+05 | 71    | 5.6  | 2.8 | 2.0 | 1.7 | 1.5 | 1.4 | 1.1 | 1.1 | 1.0 |
|         |                                                          | Reverse | 4.4E+13 | 2.8E+05 | 71    | 5.6  | 2.8 | 2.0 | 1.7 | 1.5 | 1.4 | 1.1 | 1.1 | 1.0 |
| 2-Octyl | 6S <sub>β</sub> <sup>A</sup> S <sub>α</sub> <sup>A</sup> | Forward | 1.5E+09 | 2.7E+03 | 16    | 3.8  | 2.3 | 1.8 | 1.5 | 1.4 | 1.3 | 1.1 | 1.1 | 1.0 |
|         |                                                          | Reverse | 1.5E+09 | 2.7E+03 | 16    | 3.8  | 2.3 | 1.8 | 1.5 | 1.4 | 1.3 | 1.1 | 1.1 | 1.0 |
| 2-Octyl | 6S <sub>β</sub> <sup>A</sup> S <sub>α</sub> <sup>F</sup> | Forward | 1.1E+09 | 2.4E+03 | 16    | 3.8  | 2.3 | 1.8 | 1.5 | 1.4 | 1.3 | 1.1 | 1.1 | 1.0 |
|         |                                                          | Reverse | 1.1E+09 | 2.4E+03 | 16    | 3.8  | 2.3 | 1.8 | 1.5 | 1.4 | 1.3 | 1.1 | 1.1 | 1.0 |
| 2-Octyl | 6S <sub>β</sub> <sup>E</sup> S <sub>α</sub> <sup>F</sup> | Forward | 1.7E+09 | 3.0E+03 | 17    | 3.9  | 2.3 | 1.8 | 1.5 | 1.4 | 1.3 | 1.1 | 1.1 | 1.0 |
|         |                                                          | Reverse | 1.7E+09 | 3.0E+03 | 17    | 3.9  | 2.3 | 1.8 | 1.5 | 1.4 | 1.3 | 1.1 | 1.1 | 1.0 |
| 2-Octyl | 7S <sub>α</sub> <sup>A</sup> S <sub>α</sub> <sup>A</sup> | Forward | 2.5E+09 | 2.1E+03 | 12    | 3.4  | 2.1 | 1.7 | 1.5 | 1.4 | 1.3 | 1.1 | 1.1 | 1.0 |
|         |                                                          | Reverse | 2.5E+09 | 2.1E+03 | 12    | 3.4  | 2.1 | 1.7 | 1.5 | 1.4 | 1.3 | 1.1 | 1.1 | 1.0 |
| 2-Octyl | 7S <sub>α</sub> <sup>A</sup> S <sub>α</sub> <sup>F</sup> | Forward | 1.4E+09 | 1.9E+03 | 13    | 3.4  | 2.2 | 1.7 | 1.5 | 1.4 | 1.3 | 1.1 | 1.1 | 1.0 |
|         |                                                          | Reverse | 1.4E+09 | 1.9E+03 | 13    | 3.4  | 2.2 | 1.7 | 1.5 | 1.4 | 1.3 | 1.1 | 1.1 | 1.0 |
| 2-Octyl | 7S <sub>α</sub> <sup>E</sup> S <sub>α</sub> <sup>F</sup> | Forward | 5.7E+08 | 1.4E+03 | 12    | 3.4  | 2.2 | 1.7 | 1.5 | 1.4 | 1.3 | 1.1 | 1.1 | 1.0 |
|         |                                                          | Reverse | 5.7E+08 | 1.4E+03 | 12    | 3.4  | 2.2 | 1.7 | 1.5 | 1.4 | 1.3 | 1.1 | 1.1 | 1.0 |
| 3-Octyl | 3S <sub>β</sub> S <sub>β</sub>                           | Forward | 7.0E+23 | 5.6E+09 | 1258  | 7.9  | 3.2 | 2.2 | 1.8 | 1.5 | 1.4 | 1.2 | 1.1 | 1.1 |
|         |                                                          | Reverse | 7.0E+23 | 5.6E+09 | 1258  | 7.9  | 3.2 | 2.2 | 1.8 | 1.5 | 1.4 | 1.2 | 1.1 | 1.1 |
| 3-Octyl | 4 <sup>c</sup> S <sub>β</sub> S <sub>β</sub>             | Forward | 2.6E+25 | 1.6E+11 | 23171 | 19.3 | 4.3 | 2.6 | 2.0 | 1.7 | 1.5 | 1.2 | 1.1 | 1.1 |
|         |                                                          | Reverse | 2.6E+25 | 1.6E+11 | 23171 | 19.3 | 4.3 | 2.6 | 2.0 | 1.7 | 1.5 | 1.2 | 1.1 | 1.1 |
| 3-Octyl | 4 <sup>t</sup> S <sub>β</sub> S <sub>β</sub>             | Forward | 2.9E+25 | 1.6E+11 | 21277 | 18.4 | 4.2 | 2.6 | 2.0 | 1.7 | 1.5 | 1.2 | 1.1 | 1.1 |
|         |                                                          | Reverse | 2.9E+25 | 1.6E+11 | 21277 | 18.4 | 4.2 | 2.6 | 2.0 | 1.7 | 1.5 | 1.2 | 1.1 | 1.1 |
| 3-Octyl | 5S <sub>β</sub> <sup>A</sup> S <sub>β</sub> <sup>A</sup> | Forward | 4.2E+13 | 2.3E+05 | 58    | 5.3  | 2.7 | 2.0 | 1.6 | 1.5 | 1.4 | 1.1 | 1.1 | 1.0 |
|         |                                                          | Reverse | 4.2E+13 | 2.3E+05 | 58    | 5.3  | 2.7 | 2.0 | 1.6 | 1.5 | 1.4 | 1.1 | 1.1 | 1.0 |
| 3-Octyl | 5S <sub>β</sub> <sup>A</sup> S <sub>β</sub> <sup>F</sup> | Forward | 5.2E+13 | 2.8E+05 | 67    | 5.5  | 2.7 | 2.0 | 1.7 | 1.5 | 1.4 | 1.1 | 1.1 | 1.0 |
|         |                                                          | Reverse | 5.2E+13 | 2.8E+05 | 67    | 5.5  | 2.7 | 2.0 | 1.7 | 1.5 | 1.4 | 1.1 | 1.1 | 1.0 |
| 3-Octyl | 5S <sub>β</sub> <sup>E</sup> S <sub>β</sub> <sup>F</sup> | Forward | 5.4E+13 | 2.9E+05 | 69    | 5.5  | 2.7 | 2.0 | 1.7 | 1.5 | 1.4 | 1.1 | 1.1 | 1.0 |
|         |                                                          | Reverse | 5.4E+13 | 2.9E+05 | 69    | 5.5  | 2.7 | 2.0 | 1.7 | 1.5 | 1.4 | 1.1 | 1.1 | 1.0 |
| 4-Octyl | 3S <sub>β</sub> S <sub>β</sub>                           | Forward | 5.6E+23 | 5.0E+09 | 1199  | 7.9  | 3.2 | 2.2 | 1.8 | 1.5 | 1.4 | 1.2 | 1.1 | 1.1 |
|         |                                                          | Reverse | 5.6E+23 | 5.0E+09 | 1199  | 7.9  | 3.2 | 2.2 | 1.8 | 1.5 | 1.4 | 1.2 | 1.1 | 1.1 |

Table S.5: Wigner tunneling transmission coefficient for s-alkyl radical H-migrations, determined using G4 frequencies and energy values

| Alkyl radical | rxn type                                                 |         | Temperature (K) |     |     |     |     |     |     |     |      |      |      |      |
|---------------|----------------------------------------------------------|---------|-----------------|-----|-----|-----|-----|-----|-----|-----|------|------|------|------|
|               |                                                          |         | 200             | 300 | 400 | 500 | 600 | 700 | 800 | 900 | 1000 | 1500 | 2000 | 2500 |
| 2-Butyl       | 3s <sub>α</sub> s <sub>α</sub>                           | Forward | 9.2             | 4.6 | 3.0 | 2.3 | 1.9 | 1.7 | 1.5 | 1.4 | 1.3  | 1.1  | 1.1  | 1.1  |
|               |                                                          | Reverse | 9.2             | 4.6 | 3.0 | 2.3 | 1.9 | 1.7 | 1.5 | 1.4 | 1.3  | 1.1  | 1.1  | 1.1  |
| 2-Pentyl      | 3s <sub>β</sub> s <sub>α</sub>                           | Forward | 9.1             | 4.6 | 3.0 | 2.3 | 1.9 | 1.7 | 1.5 | 1.4 | 1.3  | 1.1  | 1.1  | 1.1  |
|               |                                                          | Reverse | 9.1             | 4.6 | 3.0 | 2.3 | 1.9 | 1.7 | 1.5 | 1.4 | 1.3  | 1.1  | 1.1  | 1.1  |
| 2-Pentyl      | 4 <sup>c</sup> s <sub>α</sub> s <sub>α</sub>             | Forward | 10.5            | 5.2 | 3.4 | 2.5 | 2.1 | 1.8 | 1.6 | 1.5 | 1.4  | 1.2  | 1.1  | 1.1  |
|               |                                                          | Reverse | 10.5            | 5.2 | 3.4 | 2.5 | 2.1 | 1.8 | 1.6 | 1.5 | 1.4  | 1.2  | 1.1  | 1.1  |
| 2-Pentyl      | 4 <sup>t</sup> s <sub>α</sub> s <sub>α</sub>             | Forward | 10.5            | 5.2 | 3.4 | 2.5 | 2.1 | 1.8 | 1.6 | 1.5 | 1.4  | 1.2  | 1.1  | 1.1  |
|               |                                                          | Reverse | 10.5            | 5.2 | 3.4 | 2.5 | 2.1 | 1.8 | 1.6 | 1.5 | 1.4  | 1.2  | 1.1  | 1.1  |
| 2-Hexyl       | 3s <sub>β</sub> s <sub>α</sub>                           | Forward | 9.1             | 4.6 | 3.0 | 2.3 | 1.9 | 1.7 | 1.5 | 1.4 | 1.3  | 1.1  | 1.1  | 1.1  |
|               |                                                          | Reverse | 9.1             | 4.6 | 3.0 | 2.3 | 1.9 | 1.7 | 1.5 | 1.4 | 1.3  | 1.1  | 1.1  | 1.1  |
| 2-Hexyl       | 4 <sup>c</sup> s <sub>β</sub> s <sub>α</sub>             | Forward | 10.5            | 5.2 | 3.4 | 2.5 | 2.1 | 1.8 | 1.6 | 1.5 | 1.4  | 1.2  | 1.1  | 1.1  |
|               |                                                          | Reverse | 10.5            | 5.2 | 3.4 | 2.5 | 2.1 | 1.8 | 1.6 | 1.5 | 1.4  | 1.2  | 1.1  | 1.1  |
| 2-Hexyl       | 4 <sup>t</sup> s <sub>β</sub> s <sub>α</sub>             | Forward | 10.4            | 5.2 | 3.4 | 2.5 | 2.0 | 1.8 | 1.6 | 1.5 | 1.4  | 1.2  | 1.1  | 1.1  |
|               |                                                          | Reverse | 10.4            | 5.2 | 3.4 | 2.5 | 2.0 | 1.8 | 1.6 | 1.5 | 1.4  | 1.2  | 1.1  | 1.1  |
| 2-Hexyl       | 5s <sub>α</sub> <sup>A</sup> s <sub>α</sub> <sup>A</sup> | Forward | 8.3             | 4.2 | 2.8 | 2.2 | 1.8 | 1.6 | 1.5 | 1.4 | 1.3  | 1.1  | 1.1  | 1.0  |
|               |                                                          | Reverse | 8.3             | 4.2 | 2.8 | 2.2 | 1.8 | 1.6 | 1.5 | 1.4 | 1.3  | 1.1  | 1.1  | 1.0  |
| 2-Hexyl       | 5s <sub>α</sub> <sup>A</sup> s <sub>α</sub> <sup>E</sup> | Forward | 8.4             | 4.3 | 2.8 | 2.2 | 1.8 | 1.6 | 1.5 | 1.4 | 1.3  | 1.1  | 1.1  | 1.0  |
|               |                                                          | Reverse | 8.4             | 4.3 | 2.8 | 2.2 | 1.8 | 1.6 | 1.5 | 1.4 | 1.3  | 1.1  | 1.1  | 1.0  |
| 2-Hexyl       | 5s <sub>α</sub> <sup>E</sup> s <sub>α</sub> <sup>E</sup> | Forward | 8.4             | 4.3 | 2.8 | 2.2 | 1.8 | 1.6 | 1.5 | 1.4 | 1.3  | 1.1  | 1.1  | 1.0  |
|               |                                                          | Reverse | 8.4             | 4.3 | 2.8 | 2.2 | 1.8 | 1.6 | 1.5 | 1.4 | 1.3  | 1.1  | 1.1  | 1.0  |
| 3-Hexyl       | 3s <sub>β</sub> s <sub>β</sub>                           | Forward | 9.1             | 4.6 | 3.0 | 2.3 | 1.9 | 1.7 | 1.5 | 1.4 | 1.3  | 1.1  | 1.1  | 1.1  |
|               |                                                          | Reverse | 9.1             | 4.6 | 3.0 | 2.3 | 1.9 | 1.7 | 1.5 | 1.4 | 1.3  | 1.1  | 1.1  | 1.1  |
| 2-Heptyl      | 3s <sub>β</sub> s <sub>α</sub>                           | Forward | 9.1             | 4.6 | 3.0 | 2.3 | 1.9 | 1.7 | 1.5 | 1.4 | 1.3  | 1.1  | 1.1  | 1.1  |
|               |                                                          | Reverse | 9.1             | 4.6 | 3.0 | 2.3 | 1.9 | 1.7 | 1.5 | 1.4 | 1.3  | 1.1  | 1.1  | 1.1  |
| 2-Heptyl      | 4 <sup>c</sup> s <sub>β</sub> s <sub>α</sub>             | Forward | 10.5            | 5.2 | 3.4 | 2.5 | 2.1 | 1.8 | 1.6 | 1.5 | 1.4  | 1.2  | 1.1  | 1.1  |
|               |                                                          | Reverse | 10.5            | 5.2 | 3.4 | 2.5 | 2.1 | 1.8 | 1.6 | 1.5 | 1.4  | 1.2  | 1.1  | 1.1  |
| 2-Heptyl      | 4 <sup>t</sup> s <sub>β</sub> s <sub>α</sub>             | Forward | 10.4            | 5.2 | 3.4 | 2.5 | 2.0 | 1.8 | 1.6 | 1.5 | 1.4  | 1.2  | 1.1  | 1.1  |
|               |                                                          | Reverse | 10.4            | 5.2 | 3.4 | 2.5 | 2.0 | 1.8 | 1.6 | 1.5 | 1.4  | 1.2  | 1.1  | 1.1  |
| 2-Heptyl      | 5s <sub>β</sub> <sup>A</sup> s <sub>α</sub> <sup>A</sup> | Forward | 8.2             | 4.2 | 2.8 | 2.2 | 1.8 | 1.6 | 1.5 | 1.4 | 1.3  | 1.1  | 1.1  | 1.0  |
|               |                                                          | Reverse | 8.2             | 4.2 | 2.8 | 2.2 | 1.8 | 1.6 | 1.5 | 1.4 | 1.3  | 1.1  | 1.1  | 1.0  |
| 2-Heptyl      | 5s <sub>β</sub> <sup>A</sup> s <sub>α</sub> <sup>E</sup> | Forward | 8.3             | 4.3 | 2.8 | 2.2 | 1.8 | 1.6 | 1.5 | 1.4 | 1.3  | 1.1  | 1.1  | 1.0  |
|               |                                                          | Reverse | 8.3             | 4.3 | 2.8 | 2.2 | 1.8 | 1.6 | 1.5 | 1.4 | 1.3  | 1.1  | 1.1  | 1.0  |
| 2-Heptyl      | 5s <sub>β</sub> <sup>E</sup> s <sub>α</sub> <sup>E</sup> | Forward | 8.3             | 4.3 | 2.8 | 2.2 | 1.8 | 1.6 | 1.5 | 1.4 | 1.3  | 1.1  | 1.1  | 1.0  |
|               |                                                          | Reverse | 8.3             | 4.3 | 2.8 | 2.2 | 1.8 | 1.6 | 1.5 | 1.4 | 1.3  | 1.1  | 1.1  | 1.0  |
| 2-Heptyl      | 6s <sub>α</sub> <sup>A</sup> s <sub>α</sub> <sup>A</sup> | Forward | 7.2             | 3.8 | 2.6 | 2.0 | 1.7 | 1.5 | 1.4 | 1.3 | 1.2  | 1.1  | 1.1  | 1.0  |
|               |                                                          | Reverse | 7.2             | 3.8 | 2.6 | 2.0 | 1.7 | 1.5 | 1.4 | 1.3 | 1.2  | 1.1  | 1.1  | 1.0  |
| 2-Heptyl      | 6s <sub>α</sub> <sup>A</sup> s <sub>α</sub> <sup>E</sup> | Forward | 7.2             | 3.8 | 2.6 | 2.0 | 1.7 | 1.5 | 1.4 | 1.3 | 1.2  | 1.1  | 1.1  | 1.0  |
|               |                                                          | Reverse | 7.2             | 3.8 | 2.6 | 2.0 | 1.7 | 1.5 | 1.4 | 1.3 | 1.2  | 1.1  | 1.1  | 1.0  |
| 2-Heptyl      | 6s <sub>α</sub> <sup>E</sup> s <sub>α</sub> <sup>E</sup> | Forward | 7.3             | 3.8 | 2.6 | 2.0 | 1.7 | 1.5 | 1.4 | 1.3 | 1.3  | 1.1  | 1.1  | 1.0  |
|               |                                                          | Reverse | 7.3             | 3.8 | 2.6 | 2.0 | 1.7 | 1.5 | 1.4 | 1.3 | 1.3  | 1.1  | 1.1  | 1.0  |
| 3-Heptyl      | 3s <sub>β</sub> s <sub>β</sub>                           | Forward | 9.1             | 4.6 | 3.0 | 2.3 | 1.9 | 1.7 | 1.5 | 1.4 | 1.3  | 1.1  | 1.1  | 1.1  |
|               |                                                          | Reverse | 9.1             | 4.6 | 3.0 | 2.3 | 1.9 | 1.7 | 1.5 | 1.4 | 1.3  | 1.1  | 1.1  | 1.1  |
| 3-Heptyl      | 4 <sup>c</sup> s <sub>β</sub> s <sub>β</sub>             | Forward | 10.5            | 5.2 | 3.4 | 2.5 | 2.1 | 1.8 | 1.6 | 1.5 | 1.4  | 1.2  | 1.1  | 1.1  |
|               |                                                          | Reverse | 10.5            | 5.2 | 3.4 | 2.5 | 2.1 | 1.8 | 1.6 | 1.5 | 1.4  | 1.2  | 1.1  | 1.1  |
| 3-Heptyl      | 4 <sup>t</sup> s <sub>β</sub> s <sub>β</sub>             | Forward | 10.4            | 5.2 | 3.3 | 2.5 | 2.0 | 1.8 | 1.6 | 1.5 | 1.4  | 1.2  | 1.1  | 1.1  |

|         |                                                          |         |      |     |     |     |     |     |     |     |     |     |     |     |
|---------|----------------------------------------------------------|---------|------|-----|-----|-----|-----|-----|-----|-----|-----|-----|-----|-----|
|         |                                                          | Reverse | 10.4 | 5.2 | 3.3 | 2.5 | 2.0 | 1.8 | 1.6 | 1.5 | 1.4 | 1.2 | 1.1 | 1.1 |
| 2-Octyl | 3s <sub>β</sub> s <sub>α</sub>                           | Forward | 9.1  | 4.6 | 3.0 | 2.3 | 1.9 | 1.7 | 1.5 | 1.4 | 1.3 | 1.1 | 1.1 | 1.1 |
|         |                                                          | Reverse | 9.1  | 4.6 | 3.0 | 2.3 | 1.9 | 1.7 | 1.5 | 1.4 | 1.3 | 1.1 | 1.1 | 1.1 |
| 2-Octyl | 4 <sup>c</sup> s <sub>β</sub> s <sub>α</sub>             | Forward | 10.5 | 5.2 | 3.4 | 2.5 | 2.1 | 1.8 | 1.6 | 1.5 | 1.4 | 1.2 | 1.1 | 1.1 |
|         |                                                          | Reverse | 10.5 | 5.2 | 3.4 | 2.5 | 2.1 | 1.8 | 1.6 | 1.5 | 1.4 | 1.2 | 1.1 | 1.1 |
| 2-Octyl | 4 <sup>l</sup> s <sub>β</sub> s <sub>α</sub>             | Forward | 10.4 | 5.2 | 3.4 | 2.5 | 2.0 | 1.8 | 1.6 | 1.5 | 1.4 | 1.2 | 1.1 | 1.1 |
|         |                                                          | Reverse | 10.4 | 5.2 | 3.4 | 2.5 | 2.0 | 1.8 | 1.6 | 1.5 | 1.4 | 1.2 | 1.1 | 1.1 |
| 2-Octyl | 5s <sub>β</sub> <sup>A</sup> s <sub>α</sub> <sup>A</sup> | Forward | 8.2  | 4.2 | 2.8 | 2.2 | 1.8 | 1.6 | 1.5 | 1.4 | 1.3 | 1.1 | 1.1 | 1.0 |
|         |                                                          | Reverse | 8.2  | 4.2 | 2.8 | 2.2 | 1.8 | 1.6 | 1.5 | 1.4 | 1.3 | 1.1 | 1.1 | 1.0 |
| 2-Octyl | 5s <sub>β</sub> <sup>A</sup> s <sub>α</sub> <sup>E</sup> | Forward | 8.3  | 4.3 | 2.8 | 2.2 | 1.8 | 1.6 | 1.5 | 1.4 | 1.3 | 1.1 | 1.1 | 1.0 |
|         |                                                          | Reverse | 8.3  | 4.3 | 2.8 | 2.2 | 1.8 | 1.6 | 1.5 | 1.4 | 1.3 | 1.1 | 1.1 | 1.0 |
| 2-Octyl | 5s <sub>β</sub> <sup>E</sup> s <sub>α</sub> <sup>E</sup> | Forward | 8.4  | 4.3 | 2.8 | 2.2 | 1.8 | 1.6 | 1.5 | 1.4 | 1.3 | 1.1 | 1.1 | 1.0 |
|         |                                                          | Reverse | 8.4  | 4.3 | 2.8 | 2.2 | 1.8 | 1.6 | 1.5 | 1.4 | 1.3 | 1.1 | 1.1 | 1.0 |
| 2-Octyl | 6s <sub>β</sub> <sup>A</sup> s <sub>α</sub> <sup>A</sup> | Forward | 7.2  | 3.8 | 2.6 | 2.0 | 1.7 | 1.5 | 1.4 | 1.3 | 1.2 | 1.1 | 1.1 | 1.0 |
|         |                                                          | Reverse | 7.2  | 3.8 | 2.6 | 2.0 | 1.7 | 1.5 | 1.4 | 1.3 | 1.2 | 1.1 | 1.1 | 1.0 |
| 2-Octyl | 6s <sub>β</sub> <sup>A</sup> s <sub>α</sub> <sup>E</sup> | Forward | 7.2  | 3.8 | 2.6 | 2.0 | 1.7 | 1.5 | 1.4 | 1.3 | 1.2 | 1.1 | 1.1 | 1.0 |
|         |                                                          | Reverse | 7.2  | 3.8 | 2.6 | 2.0 | 1.7 | 1.5 | 1.4 | 1.3 | 1.2 | 1.1 | 1.1 | 1.0 |
| 2-Octyl | 6s <sub>β</sub> <sup>E</sup> s <sub>α</sub> <sup>E</sup> | Forward | 7.3  | 3.8 | 2.6 | 2.0 | 1.7 | 1.5 | 1.4 | 1.3 | 1.3 | 1.1 | 1.1 | 1.0 |
|         |                                                          | Reverse | 7.3  | 3.8 | 2.6 | 2.0 | 1.7 | 1.5 | 1.4 | 1.3 | 1.3 | 1.1 | 1.1 | 1.0 |
| 2-Octyl | 7s <sub>α</sub> <sup>A</sup> s <sub>α</sub> <sup>A</sup> | Forward | 6.8  | 3.6 | 2.5 | 1.9 | 1.6 | 1.5 | 1.4 | 1.3 | 1.2 | 1.1 | 1.1 | 1.0 |
|         |                                                          | Reverse | 6.8  | 3.6 | 2.5 | 1.9 | 1.6 | 1.5 | 1.4 | 1.3 | 1.2 | 1.1 | 1.1 | 1.0 |
| 2-Octyl | 7s <sub>α</sub> <sup>A</sup> s <sub>α</sub> <sup>E</sup> | Forward | 6.9  | 3.6 | 2.5 | 1.9 | 1.7 | 1.5 | 1.4 | 1.3 | 1.2 | 1.1 | 1.1 | 1.0 |
|         |                                                          | Reverse | 6.9  | 3.6 | 2.5 | 1.9 | 1.7 | 1.5 | 1.4 | 1.3 | 1.2 | 1.1 | 1.1 | 1.0 |
| 2-Octyl | 7s <sub>α</sub> <sup>E</sup> s <sub>α</sub> <sup>E</sup> | Forward | 6.9  | 3.6 | 2.5 | 1.9 | 1.7 | 1.5 | 1.4 | 1.3 | 1.2 | 1.1 | 1.1 | 1.0 |
|         |                                                          | Reverse | 6.9  | 3.6 | 2.5 | 1.9 | 1.7 | 1.5 | 1.4 | 1.3 | 1.2 | 1.1 | 1.1 | 1.0 |
| 3-Octyl | 3s <sub>β</sub> s <sub>β</sub>                           | Forward | 9.1  | 4.6 | 3.0 | 2.3 | 1.9 | 1.7 | 1.5 | 1.4 | 1.3 | 1.1 | 1.1 | 1.1 |
|         |                                                          | Reverse | 9.1  | 4.6 | 3.0 | 2.3 | 1.9 | 1.7 | 1.5 | 1.4 | 1.3 | 1.1 | 1.1 | 1.1 |
| 3-Octyl | 4 <sup>c</sup> s <sub>β</sub> s <sub>β</sub>             | Forward | 10.5 | 5.2 | 3.4 | 2.5 | 2.1 | 1.8 | 1.6 | 1.5 | 1.4 | 1.2 | 1.1 | 1.1 |
|         |                                                          | Reverse | 10.5 | 5.2 | 3.4 | 2.5 | 2.1 | 1.8 | 1.6 | 1.5 | 1.4 | 1.2 | 1.1 | 1.1 |
| 3-Octyl | 4 <sup>l</sup> s <sub>β</sub> s <sub>β</sub>             | Forward | 10.4 | 5.2 | 3.3 | 2.5 | 2.0 | 1.8 | 1.6 | 1.5 | 1.4 | 1.2 | 1.1 | 1.1 |
|         |                                                          | Reverse | 10.4 | 5.2 | 3.3 | 2.5 | 2.0 | 1.8 | 1.6 | 1.5 | 1.4 | 1.2 | 1.1 | 1.1 |
| 3-Octyl | 5s <sub>β</sub> <sup>A</sup> s <sub>β</sub> <sup>A</sup> | Forward | 8.2  | 4.2 | 2.8 | 2.1 | 1.8 | 1.6 | 1.4 | 1.4 | 1.3 | 1.1 | 1.1 | 1.0 |
|         |                                                          | Reverse | 8.2  | 4.2 | 2.8 | 2.1 | 1.8 | 1.6 | 1.4 | 1.4 | 1.3 | 1.1 | 1.1 | 1.0 |
| 3-Octyl | 5s <sub>β</sub> <sup>A</sup> s <sub>β</sub> <sup>E</sup> | Forward | 8.3  | 4.2 | 2.8 | 2.2 | 1.8 | 1.6 | 1.5 | 1.4 | 1.3 | 1.1 | 1.1 | 1.0 |
|         |                                                          | Reverse | 8.3  | 4.2 | 2.8 | 2.2 | 1.8 | 1.6 | 1.5 | 1.4 | 1.3 | 1.1 | 1.1 | 1.0 |
| 3-Octyl | 5s <sub>β</sub> <sup>E</sup> s <sub>β</sub> <sup>E</sup> | Forward | 8.3  | 4.2 | 2.8 | 2.2 | 1.8 | 1.6 | 1.5 | 1.4 | 1.3 | 1.1 | 1.1 | 1.0 |
|         |                                                          | Reverse | 8.3  | 4.2 | 2.8 | 2.2 | 1.8 | 1.6 | 1.5 | 1.4 | 1.3 | 1.1 | 1.1 | 1.0 |
| 4-Octyl | 3s <sub>β</sub> s <sub>β</sub>                           | Forward | 9.1  | 4.6 | 3.0 | 2.3 | 1.9 | 1.7 | 1.5 | 1.4 | 1.3 | 1.1 | 1.1 | 1.1 |
|         |                                                          | Reverse | 9.1  | 4.6 | 3.0 | 2.3 | 1.9 | 1.7 | 1.5 | 1.4 | 1.3 | 1.1 | 1.1 | 1.1 |

Table S.6: G4 Cartesian coordinates for s-alkyl radical H-migration reactants and products

| 2-Butyl                   |           |           |           | 2-Pentyl                  |           |           |           |
|---------------------------|-----------|-----------|-----------|---------------------------|-----------|-----------|-----------|
| Cartesian Coordinates (Å) |           |           |           | Cartesian Coordinates (Å) |           |           |           |
| C                         | 0.005760  | -0.008390 | -0.004552 | C                         | 0.000122  | -0.015265 | -0.004439 |
| H                         | 0.032628  | -0.000834 | 1.092963  | H                         | 0.037772  | -0.001716 | 1.092622  |
| H                         | 1.059352  | -0.049145 | -0.334382 | H                         | 1.049811  | -0.070410 | -0.344448 |
| H                         | -0.459375 | -0.945728 | -0.326049 | H                         | -0.479051 | -0.948922 | -0.316154 |
| C                         | -0.708890 | 1.183134  | -0.544081 | C                         | -0.706323 | 1.181126  | -0.544144 |
| H                         | -1.210718 | 1.097984  | -1.505051 | H                         | -1.214245 | 1.096355  | -1.501954 |
| C                         | -0.483515 | 2.550058  | 0.011937  | C                         | -0.468892 | 2.547965  | 0.005633  |
| H                         | 0.523552  | 2.914016  | -0.267799 | H                         | 0.531964  | 2.915296  | -0.295417 |
| H                         | -0.462533 | 2.501029  | 1.111143  | H                         | -0.425092 | 2.502619  | 1.105181  |
| C                         | -1.523722 | 3.580479  | -0.443679 | C                         | -1.516447 | 3.584188  | -0.425966 |
| H                         | -2.530352 | 3.287589  | -0.128615 | H                         | -2.509325 | 3.242011  | -0.108660 |
| H                         | -1.313211 | 4.570703  | -0.028317 | H                         | -1.545888 | 3.625801  | -1.522669 |
| H                         | -1.531802 | 3.671572  | -1.535347 | C                         | -1.246783 | 4.982650  | 0.133691  |
|                           |           |           |           | H                         | -0.271869 | 5.360242  | -0.194994 |
|                           |           |           |           | H                         | -2.007844 | 5.698148  | -0.193126 |
|                           |           |           |           | H                         | -1.244624 | 4.977236  | 1.229527  |

  

| 3-Pentyl                  |           |           |           | 2-Hexyl                   |           |           |           |
|---------------------------|-----------|-----------|-----------|---------------------------|-----------|-----------|-----------|
| Cartesian Coordinates (Å) |           |           |           | Cartesian Coordinates (Å) |           |           |           |
| C                         | 0.003530  | -0.009024 | 0.001971  | C                         | 0.017290  | -0.008274 | -0.006350 |
| H                         | 0.010539  | -0.006706 | 1.096620  | H                         | 0.000924  | -0.030934 | 1.091126  |
| H                         | 1.045602  | -0.014661 | -0.335853 | H                         | 1.062622  | 0.027663  | -0.329491 |
| H                         | -0.460350 | -0.942049 | -0.332254 | H                         | -0.382081 | -0.983853 | -0.336870 |
| C                         | -0.743122 | 1.213785  | -0.545508 | C                         | -0.771569 | 1.136455  | -0.543888 |
| H                         | -0.783679 | 1.139914  | -1.648968 | H                         | -0.484580 | 1.560044  | -1.503436 |
| H                         | -1.796157 | 1.180614  | -0.228214 | C                         | -2.109354 | 1.499362  | 0.009669  |
| C                         | -0.138753 | 2.516704  | -0.139237 | H                         | -2.084602 | 1.438881  | 1.108922  |
| H                         | 0.933691  | 2.549318  | 0.046184  | H                         | -2.866188 | 0.748753  | -0.291713 |
| C                         | -0.864889 | 3.811029  | -0.298269 | C                         | -2.601989 | 2.887811  | -0.420942 |
| H                         | -1.913485 | 3.686372  | 0.010901  | H                         | -2.619030 | 2.937079  | -1.518659 |
| H                         | -0.922416 | 4.086726  | -1.368513 | H                         | -1.875171 | 3.644100  | -0.096034 |
| C                         | -0.229688 | 4.973144  | 0.475354  | C                         | -3.989208 | 3.242958  | 0.123665  |
| H                         | 0.804198  | 5.138781  | 0.153403  | H                         | -3.971777 | 3.191709  | 1.220601  |
| H                         | -0.781138 | 5.905192  | 0.318451  | H                         | -4.711364 | 2.482240  | -0.202055 |
| H                         | -0.212501 | 4.765902  | 1.550098  | C                         | -4.472085 | 4.627826  | -0.315134 |
|                           |           |           |           | H                         | -4.532860 | 4.698172  | -1.406997 |
|                           |           |           |           | H                         | -5.464405 | 4.852730  | 0.088387  |
|                           |           |           |           | H                         | -3.787895 | 5.412282  | 0.027175  |



| 3-Hexyl                   |           |           |           | 2-Heptyl                  |           |           |           |
|---------------------------|-----------|-----------|-----------|---------------------------|-----------|-----------|-----------|
| Cartesian Coordinates (Å) |           |           |           | Cartesian Coordinates (Å) |           |           |           |
| C                         | 0.006376  | -0.012885 | 0.003289  | C                         | -0.003744 | 0.024295  | -0.003632 |
| H                         | 0.012030  | -0.016391 | 1.098726  | H                         | 0.041565  | 0.007121  | 1.093085  |
| H                         | 1.046897  | -0.023093 | -0.335340 | H                         | 1.043296  | 0.085262  | -0.350765 |
| H                         | -0.467465 | -0.942335 | -0.328233 | H                         | -0.489189 | 0.956902  | -0.308789 |
| C                         | -0.744810 | 1.210382  | -0.537010 | C                         | -0.708809 | -1.17329  | -0.542578 |
| H                         | -0.199304 | 2.124026  | -0.233042 | H                         | -1.22248  | -1.087835 | -1.497219 |
| H                         | -0.703258 | 1.217732  | -1.636474 | C                         | -0.462523 | -2.540803 | 0.002191  |
| C                         | -2.166686 | 1.287740  | -0.089403 | H                         | 0.537848  | -2.902718 | -0.306442 |
| H                         | -2.425996 | 0.848457  | 0.872563  | H                         | -0.411692 | -2.497082 | 1.101394  |
| C                         | -3.151399 | 2.208074  | -0.729582 | C                         | -1.509481 | -3.579167 | -0.425348 |
| H                         | -3.015270 | 2.196977  | -1.822194 | H                         | -1.545502 | -3.620672 | -1.522763 |
| H                         | -2.945553 | 3.256029  | -0.435568 | H                         | -2.502887 | -3.240545 | -0.102708 |
| C                         | -4.614773 | 1.888641  | -0.389793 | C                         | -1.240639 | -4.981733 | 0.127508  |
| H                         | -4.738950 | 1.905404  | 0.700919  | H                         | -1.202998 | -4.93953  | 1.225319  |
| H                         | -4.839333 | 0.862185  | -0.705045 | H                         | -0.243883 | -5.31571  | -0.194316 |
| C                         | -5.608007 | 2.858160  | -1.034296 | C                         | -2.283893 | -6.01878  | -0.302094 |
| H                         | -5.531788 | 2.835463  | -2.127254 | H                         | -2.320482 | -6.061477 | -1.398869 |
| H                         | -6.640158 | 2.609293  | -0.768409 | H                         | -3.27922  | -5.684499 | 0.019761  |
| H                         | -5.420472 | 3.889053  | -0.713137 | C                         | -2.0097   | -7.41813  | 0.25536   |
|                           |           |           |           | H                         | -2.001527 | -7.413028 | 1.351137  |
|                           |           |           |           | H                         | -2.771016 | -8.13508  | -0.067976 |
|                           |           |           |           | H                         | -1.035897 | -7.793766 | -0.078617 |

  

| 3-Heptyl                  |           |           |           | 4-Heptyl                  |           |           |           |
|---------------------------|-----------|-----------|-----------|---------------------------|-----------|-----------|-----------|
| Cartesian Coordinates (Å) |           |           |           | Cartesian Coordinates (Å) |           |           |           |
| C                         | 0.004707  | 0.018927  | 0.004904  | C                         | -0.002143 | 0.022806  | -0.026161 |
| H                         | 0.004679  | 0.024287  | 1.100666  | H                         | -0.022714 | 0.059994  | 1.068914  |
| H                         | 1.05013   | 0.024622  | -0.323634 | H                         | 1.049263  | 0.022252  | -0.335219 |
| H                         | -0.454812 | 0.953483  | -0.332113 | H                         | -0.457271 | 0.945747  | -0.399017 |
| C                         | -0.740148 | -1.201745 | -0.54209  | C                         | -0.734221 | -1.214012 | -0.551805 |
| H                         | -0.754183 | -1.161859 | -1.639568 | H                         | -1.790016 | -1.171333 | -0.253666 |
| C                         | -0.127996 | -2.532268 | -0.09361  | H                         | -0.728646 | -1.211314 | -1.648783 |
| H                         | 0.92299   | -2.574398 | -0.411806 | C                         | -0.127529 | -2.533851 | -0.05161  |
| H                         | -0.113647 | -2.579091 | 1.00335   | H                         | 0.93141   | -2.588629 | -0.347182 |
| C                         | -0.867148 | -3.761986 | -0.640585 | H                         | -0.106342 | -2.509667 | 1.055648  |
| H                         | -0.905171 | -3.685366 | -1.744939 | C                         | -0.847835 | -3.749691 | -0.53066  |
| H                         | -1.92176  | -3.729724 | -0.325784 | H                         | -1.923897 | -3.679271 | -0.682012 |
| C                         | -0.260359 | -5.063312 | -0.233884 | C                         | -0.231884 | -5.108414 | -0.497006 |
| H                         | 0.814641  | -5.097498 | -0.064592 | H                         | -0.191915 | -5.487941 | 0.542923  |

|   |           |           |           |   |           |           |           |
|---|-----------|-----------|-----------|---|-----------|-----------|-----------|
| C | -0.991914 | -6.357145 | -0.371788 | H | 0.822391  | -5.046332 | -0.808233 |
| H | -1.076175 | -6.635277 | -1.439624 | C | -0.963745 | -6.144493 | -1.362599 |
| H | -2.032567 | -6.230313 | -0.03751  | H | -0.985222 | -5.791859 | -2.40106  |
| C | -0.339711 | -7.51833  | 0.388899  | H | -2.011542 | -6.203036 | -1.040022 |
| H | -0.295639 | -7.308416 | 1.462376  | C | -0.329705 | -7.536386 | -1.301064 |
| H | -0.896458 | -8.449797 | 0.248081  | H | -0.323869 | -7.924349 | -0.276133 |
| H | 0.685621  | -7.686572 | 0.041903  | H | -0.87425  | -8.252261 | -1.924729 |
| H | -1.791076 | -1.161819 | -0.225675 | H | 0.708885  | -7.514293 | -1.649954 |

| 2-Octyl                   |           |           |           | 3-Octyl                   |           |           |           |
|---------------------------|-----------|-----------|-----------|---------------------------|-----------|-----------|-----------|
| Cartesian Coordinates (Å) |           |           |           | Cartesian Coordinates (Å) |           |           |           |
| C                         | -0.000864 | 0.027101  | -0.001769 | C                         | -0.001002 | 0.013211  | 0.002751  |
| H                         | 0.044886  | 0.009111  | 1.094921  | H                         | 0.000886  | 0.010519  | 1.100889  |
| H                         | 1.046114  | 0.087064  | -0.349274 | H                         | 1.054558  | 0.012280  | -0.300331 |
| H                         | -0.485337 | 0.960489  | -0.306073 | C                         | -0.671645 | -1.268263 | -0.503781 |
| C                         | -0.707520 | -1.169318 | -0.541237 | H                         | -0.675915 | -1.264804 | -1.603076 |
| H                         | -1.221729 | -1.082599 | -1.495471 | C                         | 0.001496  | -2.549581 | -0.003252 |
| C                         | -0.462048 | -2.537488 | 0.002231  | H                         | 1.056869  | -2.549937 | -0.309122 |
| H                         | 0.538053  | -2.899730 | -0.306930 | H                         | 0.004830  | -2.559272 | 1.094629  |
| H                         | -0.410904 | -2.494787 | 1.101471  | C                         | -0.668095 | -3.833593 | -0.514700 |
| C                         | -1.509673 | -3.574954 | -0.425934 | H                         | -0.695768 | -3.797499 | -1.621369 |
| H                         | -1.546034 | -3.615545 | -1.523342 | H                         | -1.726749 | -3.844237 | -0.212666 |
| H                         | -2.502815 | -3.236228 | -0.102689 | C                         | -0.001609 | -5.087274 | -0.055153 |
| C                         | -1.240917 | -4.978200 | 0.125882  | H                         | 1.072600  | -5.062173 | 0.120801  |
| H                         | -1.203108 | -4.935894 | 1.223593  | C                         | -0.667315 | -6.420128 | -0.147631 |
| H                         | -0.244053 | -5.310957 | -0.196490 | H                         | -0.719967 | -6.747714 | -1.203423 |
| C                         | -2.284231 | -6.014492 | -0.304487 | H                         | -1.718168 | -6.330388 | 0.165815  |
| H                         | -2.321821 | -6.058743 | -1.402172 | C                         | 0.027936  | -7.514358 | 0.672144  |
| H                         | -3.281355 | -5.681549 | 0.016727  | H                         | 0.041859  | -7.258271 | 1.736383  |
| C                         | -2.018162 | -7.418580 | 0.248811  | H                         | -0.479060 | -8.477820 | 0.561854  |
| H                         | -1.980070 | -7.373510 | 1.345410  | H                         | 1.066590  | -7.644911 | 0.349304  |
| H                         | -1.022562 | -7.751681 | -0.073708 | H                         | -1.727996 | -1.268720 | -0.199633 |
| C                         | -3.066100 | -8.447337 | -0.184495 | C                         | -0.677240 | 1.289855  | -0.504309 |
| H                         | -2.846705 | -9.439449 | 0.222670  | H                         | -0.175440 | 2.186565  | -0.127122 |
| H                         | -4.067090 | -8.161254 | 0.157597  | H                         | -0.664054 | 1.336796  | -1.599061 |
| H                         | -3.105085 | -8.536870 | -1.275987 | H                         | -1.724845 | 1.336236  | -0.186168 |

| 4-Octyl                   |           |          |           |
|---------------------------|-----------|----------|-----------|
| Cartesian Coordinates (Å) |           |          |           |
| C                         | -0.000596 | 0.024986 | -0.032630 |
| H                         | -0.008526 | 0.062593 | 1.062595  |
| H                         | 1.047167  | 0.025203 | -0.353824 |

|   |           |           |           |
|---|-----------|-----------|-----------|
| H | -0.460793 | 0.947397  | -0.400544 |
| C | -0.737614 | -1.212678 | -0.549297 |
| H | -1.790081 | -1.170466 | -0.239551 |
| H | -0.744143 | -1.210713 | -1.646278 |
| C | -0.124634 | -2.531724 | -0.054985 |
| H | 0.931503  | -2.585361 | -0.360872 |
| H | -0.092369 | -2.507568 | 1.052024  |
| C | -0.848082 | -3.748522 | -0.526923 |
| H | -1.924480 | -3.677522 | -0.675328 |
| C | -0.233775 | -5.108054 | -0.487783 |
| H | -0.200003 | -5.484973 | 0.553226  |
| H | 0.821992  | -5.046799 | -0.793561 |
| C | -0.962527 | -6.144713 | -1.355358 |
| H | -0.975790 | -5.796780 | -2.396761 |
| H | -2.014233 | -6.200118 | -1.041675 |
| C | -0.339824 | -7.542681 | -1.289800 |
| H | -0.326927 | -7.884120 | -0.245985 |
| H | 0.711813  | -7.485454 | -1.601101 |
| C | -1.073702 | -8.570419 | -2.155379 |
| H | -0.608024 | -9.558618 | -2.086339 |
| H | -2.119964 | -8.673209 | -1.846208 |
| H | -1.070372 | -8.274059 | -3.210327 |

---

Table S.7: G4 Cartesian coordinates for s-alkyl radical H-migration transition states.

| 2-Butyl: 3s <sub>α</sub> s <sub>α</sub> |           |           |           | 2-Pentyl: 3s <sub>β</sub> s <sub>α</sub> |           |           |           |
|-----------------------------------------|-----------|-----------|-----------|------------------------------------------|-----------|-----------|-----------|
| Cartesian Coordinates (Å)               |           |           |           | Cartesian Coordinates (Å)                |           |           |           |
| C                                       | -0.00733  | 0.004445  | -0.014025 | C                                        | -0.010277 | 0.002762  | -0.017266 |
| C                                       | 0.001125  | -0.011844 | 1.486109  | C                                        | -0.001415 | -0.013677 | 1.483014  |
| C                                       | 1.287151  | -0.015946 | 2.251641  | C                                        | 1.284277  | -0.010912 | 2.248336  |
| C                                       | 1.377017  | -0.642161 | 3.611998  | C                                        | 1.391053  | -0.636152 | 3.610059  |
| H                                       | 0.50704   | 1.014098  | 2.104688  | C                                        | 2.559927  | -0.099415 | 4.443698  |
| H                                       | 2.191834  | 0.094506  | 1.660462  | H                                        | 0.496129  | 1.014765  | 2.103594  |
| H                                       | -0.867107 | -0.394883 | 2.014838  | H                                        | 2.189735  | 0.110022  | 1.658190  |
| H                                       | 2.247439  | -0.284769 | 4.170779  | H                                        | -0.867267 | -0.402516 | 2.011334  |
| H                                       | 0.485901  | -0.419798 | 4.211345  | H                                        | 0.449863  | -0.480373 | 4.154848  |
| H                                       | 1.448491  | -1.740345 | 3.552366  | H                                        | 1.488256  | -1.731467 | 3.510589  |
| H                                       | -0.970639 | 0.334697  | -0.414736 | H                                        | -0.977406 | 0.322845  | -0.416990 |
| H                                       | 0.762752  | 0.678355  | -0.408471 | H                                        | 0.752342  | 0.684870  | -0.412069 |
| H                                       | 0.203265  | -0.992208 | -0.434775 | H                                        | 0.210519  | -0.991551 | -0.438295 |
|                                         |           |           |           | H                                        | 2.616755  | -0.597605 | 5.416626  |
|                                         |           |           |           | H                                        | 3.514567  | -0.261479 | 3.931044  |
|                                         |           |           |           | H                                        | 2.456848  | 0.976804  | 4.616141  |

  

| 2-Pentyl: 4 <sup>s</sup> s <sub>α</sub> s <sub>α</sub> |           |           |           | 2-Pentyl: 4 <sup>t</sup> s <sub>α</sub> s <sub>α</sub> |           |           |           |
|--------------------------------------------------------|-----------|-----------|-----------|--------------------------------------------------------|-----------|-----------|-----------|
| Cartesian Coordinates (Å)                              |           |           |           | Cartesian Coordinates (Å)                              |           |           |           |
| C                                                      | -0.057018 | -0.091884 | -0.032697 | C                                                      | -0.004046 | 0.018106  | -0.031971 |
| C                                                      | -0.003321 | 0.004079  | 1.470522  | C                                                      | -0.000452 | 0.005662  | 1.475005  |
| C                                                      | 1.351903  | 0.036923  | 2.191149  | C                                                      | 1.338115  | -0.006952 | 2.228437  |
| C                                                      | 1.091681  | 1.420721  | 2.802994  | C                                                      | 1.119687  | -1.427913 | 2.769585  |
| C                                                      | 2.004134  | 2.574522  | 2.474496  | C                                                      | 0.908016  | -1.635308 | 4.247162  |
| H                                                      | -0.063512 | 1.309300  | 2.001420  | H                                                      | -0.074466 | -1.284407 | 2.036098  |
| H                                                      | 0.713752  | 1.396036  | 3.826360  | H                                                      | 1.691289  | -2.204510 | 2.259352  |
| H                                                      | 2.192978  | 0.046735  | 1.489768  | H                                                      | 1.416819  | 0.751570  | 3.012843  |
| H                                                      | 1.521608  | -0.769744 | 2.909283  | H                                                      | 2.208637  | 0.093282  | 1.573546  |
| H                                                      | 2.187942  | 2.644831  | 1.396027  | H                                                      | -0.790360 | 0.584924  | 1.955305  |
| H                                                      | 1.584858  | 3.529402  | 2.806312  | H                                                      | 0.166893  | -0.932383 | 4.646039  |
| H                                                      | 2.986980  | 2.461176  | 2.957572  | H                                                      | 0.561443  | -2.649401 | 4.468992  |
| H                                                      | -0.783342 | -0.540711 | 2.004852  | H                                                      | 1.837283  | -1.473312 | 4.814677  |
| H                                                      | -1.063560 | 0.104209  | -0.414941 | H                                                      | -0.999621 | -0.187733 | -0.437146 |
| H                                                      | 0.626813  | 0.623364  | -0.504548 | H                                                      | 0.317530  | 0.993469  | -0.428391 |
| H                                                      | 0.238627  | -1.092746 | -0.383577 | H                                                      | 0.685473  | -0.731511 | -0.438282 |

  

| 2-Hexyl: 3s <sub>β</sub> s <sub>α</sub> |  |  |  | 2-Hexyl: 4 <sup>s</sup> s <sub>β</sub> s <sub>α</sub> |  |  |  |
|-----------------------------------------|--|--|--|-------------------------------------------------------|--|--|--|
| Cartesian Coordinates (Å)               |  |  |  | Cartesian Coordinates (Å)                             |  |  |  |

|   |           |           |           |   |           |           |           |
|---|-----------|-----------|-----------|---|-----------|-----------|-----------|
| C | -0.011410 | 0.010106  | -0.021525 | C | -0.058029 | -0.136943 | -0.036498 |
| C | -0.003523 | -0.015096 | 1.478623  | C | -0.006580 | -0.015447 | 1.464972  |
| C | 1.282368  | -0.012377 | 2.244245  | C | 1.348744  | 0.040201  | 2.184471  |
| C | 1.391388  | -0.642040 | 3.603292  | C | 1.084591  | 1.437194  | 2.762115  |
| C | 2.549082  | -0.098319 | 4.451253  | C | 1.981326  | 2.593537  | 2.393711  |
| C | 2.659224  | -0.773101 | 5.820685  | C | 1.423326  | 3.956811  | 2.813177  |
| H | 0.490714  | 1.011314  | 2.104953  | H | -0.077116 | 1.299228  | 1.971639  |
| H | 2.187055  | 0.114138  | 1.654176  | H | 0.718508  | 1.441125  | 3.791260  |
| H | -0.867984 | -0.410648 | 2.004139  | H | 2.190803  | 0.033419  | 1.484260  |
| H | 0.446525  | -0.501053 | 4.147593  | H | 1.519040  | -0.746918 | 2.923715  |
| H | 1.503687  | -1.736730 | 3.501659  | H | 2.162709  | 2.584826  | 1.310236  |
| H | -0.979916 | 0.327748  | -0.419866 | H | 2.972675  | 2.447757  | 2.855344  |
| H | 0.747986  | 0.698424  | -0.411783 | H | -0.782199 | -0.557783 | 2.008059  |
| H | 0.214624  | -0.980549 | -0.448389 | H | -1.065703 | 0.044541  | -0.422917 |
| H | 3.489675  | -0.229846 | 3.900199  | H | 0.620490  | 0.575945  | -0.519508 |
| H | 2.421291  | 0.984117  | 4.576939  | H | 0.246303  | -1.141032 | -0.370267 |
| H | 2.817281  | -1.852731 | 5.719466  | H | 1.263078  | 4.000453  | 3.896155  |
| H | 3.494025  | -0.367712 | 6.400930  | H | 2.107830  | 4.767590  | 2.544971  |
| H | 1.745208  | -0.628562 | 6.407857  | H | 0.460644  | 4.151118  | 2.329159  |

| 2-Hexyl: 4 <sup>t</sup> s <sub>p</sub> s <sub>σ</sub> |           |           |           | 2-Hexyl: 5s <sub>σ</sub> A <sub>s<sub>σ</sub></sub> <sup>A</sup> |           |           |           |
|-------------------------------------------------------|-----------|-----------|-----------|------------------------------------------------------------------|-----------|-----------|-----------|
| Cartesian Coordinates (Å)                             |           |           |           | Cartesian Coordinates (Å)                                        |           |           |           |
| C                                                     | 0.002562  | 0.038232  | -0.042216 | C                                                                | -0.011550 | -0.030586 | -0.000480 |
| C                                                     | 0.002150  | 0.016214  | 1.464620  | C                                                                | -0.003947 | -0.034588 | 1.527852  |
| C                                                     | 1.338403  | -0.012026 | 2.221823  | C                                                                | 1.492837  | 0.022439  | 1.943604  |
| C                                                     | 1.101395  | -1.428176 | 2.765203  | C                                                                | 2.185244  | 0.879576  | 0.884364  |
| C                                                     | 0.862665  | -1.631717 | 4.240899  | H                                                                | 1.218735  | 0.587480  | -0.053254 |
| C                                                     | 0.361263  | -3.035893 | 4.591020  | H                                                                | -0.514834 | -0.906545 | 1.954153  |
| H                                                     | -0.086144 | -1.276269 | 2.019485  | H                                                                | -0.526554 | 0.851575  | 1.904177  |
| H                                                     | 1.673498  | -2.215634 | 2.269917  | H                                                                | 1.918365  | -0.987073 | 1.940755  |
| H                                                     | 1.426765  | 0.747676  | 3.004141  | H                                                                | 1.621111  | 0.414986  | 2.959757  |
| H                                                     | 2.211060  | 0.073933  | 1.567866  | C                                                                | 0.116020  | -1.365136 | -0.700437 |
| H                                                     | -0.783497 | 0.599867  | 1.946691  | H                                                                | -0.785783 | -1.978383 | -0.556209 |
| H                                                     | 0.144691  | -0.881302 | 4.600060  | H                                                                | 0.259051  | -1.245260 | -1.779213 |
| H                                                     | 1.795603  | -1.429354 | 4.793578  | H                                                                | 0.961505  | -1.946105 | -0.314420 |
| H                                                     | -0.993852 | -0.155849 | -0.451090 | H                                                                | -0.739620 | 0.636443  | -0.465103 |
| H                                                     | 0.334068  | 1.013122  | -0.431566 | C                                                                | 2.181523  | 2.377795  | 1.090916  |
| H                                                     | 0.686189  | -0.715112 | -0.451564 | H                                                                | 2.814437  | 2.664286  | 1.943858  |
| H                                                     | 1.077132  | -3.800731 | 4.270008  | H                                                                | 2.559828  | 2.909324  | 0.211766  |
| H                                                     | 0.214071  | -3.149726 | 5.669547  | H                                                                | 1.174150  | 2.755590  | 1.300553  |
| H                                                     | -0.591541 | -3.246713 | 4.094489  | H                                                                | 3.136810  | 0.493412  | 0.515257  |

| 2-Hexyl: 5s <sub>a</sub> A <sub>s<sub>d</sub>E</sub> |                           |           |           | 2-Hexyl: 5s <sub>a</sub> E <sub>s<sub>d</sub>E</sub> |                           |           |           |
|------------------------------------------------------|---------------------------|-----------|-----------|------------------------------------------------------|---------------------------|-----------|-----------|
|                                                      | Cartesian Coordinates (Å) |           |           |                                                      | Cartesian Coordinates (Å) |           |           |
| C                                                    | -0.008004                 | -0.024243 | -0.005737 | C                                                    | 0.005734                  | 0.011920  | -0.024029 |
| C                                                    | 0.011711                  | -0.019339 | 1.522851  | C                                                    | 0.006233                  | 0.008981  | 1.483868  |
| C                                                    | 1.509961                  | 0.009632  | 1.922908  | C                                                    | 1.333761                  | 0.004415  | 2.234124  |
| C                                                    | 2.187690                  | 0.890398  | 0.879270  | C                                                    | 1.070730                  | -0.823334 | 3.515395  |
| C                                                    | 3.600334                  | 0.580740  | 0.451582  | C                                                    | 0.156816                  | -1.961662 | 3.073889  |
| H                                                    | 1.228096                  | 0.587582  | -0.065409 | C                                                    | -0.887434                 | -2.485499 | 4.027242  |
| H                                                    | -0.516284                 | -0.875348 | 1.960587  | H                                                    | -0.357844                 | -1.199815 | 2.043386  |
| H                                                    | -0.482798                 | 0.884875  | 1.895805  | H                                                    | -0.733296                 | 0.685136  | 1.924687  |
| H                                                    | 1.929831                  | -1.003127 | 1.871884  | H                                                    | 1.716622                  | 1.008117  | 2.453976  |
| H                                                    | 1.659365                  | 0.358386  | 2.951714  | H                                                    | 2.093991                  | -0.498624 | 1.622062  |
| H                                                    | 2.001411                  | 1.958102  | 1.032562  | H                                                    | 0.544333                  | -0.202090 | 4.251938  |
| H                                                    | 3.709071                  | -0.469810 | 0.158510  | H                                                    | 1.997141                  | -1.164837 | 3.992266  |
| H                                                    | 3.912423                  | 1.200916  | -0.395439 | H                                                    | 0.684131                  | -2.747662 | 2.523898  |
| H                                                    | 4.320361                  | 0.761028  | 1.264777  | H                                                    | -1.499414                 | -1.672178 | 4.434133  |
| C                                                    | 0.091453                  | -1.364408 | -0.699491 | H                                                    | -1.558240                 | -3.200994 | 3.539895  |
| H                                                    | -0.821767                 | -1.959508 | -0.549608 | H                                                    | -0.433256                 | -3.003582 | 4.885980  |
| H                                                    | 0.232647                  | -1.252399 | -1.779350 | H                                                    | -1.003438                 | -0.119221 | -0.428725 |
| H                                                    | 0.925920                  | -1.961571 | -0.314367 | H                                                    | 0.395086                  | 0.958151  | -0.430421 |
| H                                                    | -0.730606                 | 0.650843  | -0.467229 | H                                                    | 0.636735                  | -0.789689 | -0.425076 |

  

| 3-Hexyl: 3s <sub>β</sub> s <sub>β</sub> |                           |           |           | 2-Heptyl: 3s <sub>β</sub> s <sub>α</sub> |                           |           |           |
|-----------------------------------------|---------------------------|-----------|-----------|------------------------------------------|---------------------------|-----------|-----------|
|                                         | Cartesian Coordinates (Å) |           |           |                                          | Cartesian Coordinates (Å) |           |           |
| C                                       | -0.012471                 | 0.005664  | -0.019053 | C                                        | -0.017238                 | 0.008141  | -0.024029 |
| C                                       | -0.008114                 | -0.001326 | 1.513782  | C                                        | -0.006324                 | -0.016211 | 1.476124  |
| C                                       | 1.369580                  | 0.003766  | 2.112734  | C                                        | 1.280912                  | -0.010306 | 2.239448  |
| C                                       | 1.617796                  | -0.467779 | 3.510407  | C                                        | 1.392961                  | -0.640492 | 3.598233  |
| C                                       | 2.746017                  | 0.079225  | 4.338158  | C                                        | 2.551931                  | -0.096998 | 4.444078  |
| C                                       | 3.167377                  | -0.841960 | 5.488466  | C                                        | 2.67076                   | -0.766929 | 5.816669  |
| H                                       | 1.908780                  | -1.136748 | 2.432729  | C                                        | 3.831456                  | -0.224018 | 6.654602  |
| H                                       | 0.766483                  | -0.911776 | 4.020999  | H                                        | 0.486669                  | 1.011581  | 2.101187  |
| H                                       | 2.114490                  | 0.679065  | 1.698479  | H                                        | 2.184358                  | 0.118021  | 1.647916  |
| H                                       | 3.610639                  | 0.275018  | 3.689320  | H                                        | -0.868848                 | -0.413549 | 2.003489  |
| H                                       | 2.463577                  | 1.065195  | 4.746995  | H                                        | 0.448742                  | -0.499719 | 4.143554  |
| H                                       | -0.558857                 | -0.879222 | 1.878268  | H                                        | 1.504832                  | -1.734963 | 3.494866  |
| H                                       | -0.577673                 | 0.869485  | 1.882979  | H                                        | -0.987323                 | 0.323167  | -0.420613 |
| H                                       | 3.970734                  | -0.394800 | 6.082286  | H                                        | 0.739676                  | 0.698094  | -0.416211 |
| H                                       | 2.325954                  | -1.038515 | 6.162149  | H                                        | 0.21036                   | -0.98221  | -0.450781 |
| H                                       | 3.518820                  | -1.807095 | 5.109563  | H                                        | 3.493815                  | -0.228569 | 3.893171  |
| H                                       | -1.032914                 | 0.028475  | -0.414203 | H                                        | 2.426443                  | 0.986521  | 4.57142   |
| H                                       | 0.514614                  | 0.883594  | -0.408793 | H                                        | 2.791001                  | -1.850156 | 5.681705  |

|                                                                    |           |           |           |                                                                    |           |           |           |
|--------------------------------------------------------------------|-----------|-----------|-----------|--------------------------------------------------------------------|-----------|-----------|-----------|
| H                                                                  | 0.488368  | -0.882930 | -0.416766 | H                                                                  | 1.728989  | -0.634545 | 6.366132  |
|                                                                    |           |           |           | H                                                                  | 3.719872  | 0.850836  | 6.836413  |
|                                                                    |           |           |           | H                                                                  | 3.890397  | -0.721303 | 7.627953  |
|                                                                    |           |           |           | H                                                                  | 4.790475  | -0.373374 | 6.145928  |
| 2-Heptyl: 4 <sup>c</sup> s <sub>β</sub> s <sub>α</sub>             |           |           |           | 2-Heptyl: 4 <sup>t</sup> s <sub>β</sub> s <sub>α</sub>             |           |           |           |
| Cartesian Coordinates (Å)                                          |           |           |           | Cartesian Coordinates (Å)                                          |           |           |           |
| C                                                                  | -0.077629 | -0.180853 | -0.024702 | C                                                                  | 0.007556  | 0.042832  | -0.050446 |
| C                                                                  | -0.013254 | -0.037417 | 1.474314  | C                                                                  | 0.005045  | 0.021867  | 1.45639   |
| C                                                                  | 1.348624  | 0.03512   | 2.179787  | C                                                                  | 1.339819  | -0.010966 | 2.215857  |
| C                                                                  | 1.086958  | 1.442856  | 2.732746  | C                                                                  | 1.094687  | -1.424437 | 2.763312  |
| C                                                                  | 1.973367  | 2.594411  | 2.327678  | C                                                                  | 0.84866   | -1.622072 | 4.238258  |
| C                                                                  | 1.420064  | 3.969569  | 2.719892  | C                                                                  | 0.335077  | -3.021075 | 4.598574  |
| C                                                                  | 2.342554  | 5.124926  | 2.323507  | C                                                                  | 0.110224  | -3.212365 | 6.100523  |
| H                                                                  | -0.084085 | 1.285031  | 1.960652  | H                                                                  | -0.089319 | -1.26961  | 2.012949  |
| H                                                                  | 0.735728  | 1.465941  | 3.766737  | H                                                                  | 1.665939  | -2.2154   | 2.272798  |
| H                                                                  | 2.18484   | 0.01505   | 1.472972  | H                                                                  | 1.431831  | 0.750985  | 2.995484  |
| H                                                                  | 1.526108  | -0.736414 | 2.933621  | H                                                                  | 2.213641  | 0.067339  | 1.562476  |
| H                                                                  | 2.143211  | 2.564309  | 1.241722  | H                                                                  | -0.779084 | 0.608739  | 1.937024  |
| H                                                                  | 2.972398  | 2.465882  | 2.780321  | H                                                                  | 0.133862  | -0.866023 | 4.594916  |
| H                                                                  | -0.781383 | -0.575158 | 2.032385  | H                                                                  | 1.780752  | -1.425575 | 4.796602  |
| H                                                                  | -1.089656 | -0.010107 | -0.404584 | H                                                                  | -0.989086 | -0.147643 | -0.460472 |
| H                                                                  | 0.592793  | 0.528545  | -0.523879 | H                                                                  | 0.343377  | 1.016144  | -0.440067 |
| H                                                                  | 0.229096  | -1.188022 | -0.346764 | H                                                                  | 0.688763  | -0.713458 | -0.458398 |
| H                                                                  | 1.247998  | 3.991853  | 3.804126  | H                                                                  | 1.050745  | -3.770775 | 4.2359    |
| H                                                                  | 0.435401  | 4.103506  | 2.254674  | H                                                                  | -0.600167 | -3.208644 | 4.056258  |
| H                                                                  | 1.919576  | 6.092084  | 2.612836  | H                                                                  | -0.257198 | -4.218701 | 6.324892  |
| H                                                                  | 3.322982  | 5.033349  | 2.804447  | H                                                                  | 1.03874   | -3.064111 | 6.663358  |
| H                                                                  | 2.508508  | 5.145651  | 1.240447  | H                                                                  | -0.625263 | -2.496779 | 6.485193  |
| 2-Heptyl: 5 <sub>sp</sub> <sup>A</sup> s <sub>α</sub> <sup>A</sup> |           |           |           | 2-Heptyl: 5 <sub>sp</sub> <sup>A</sup> s <sub>α</sub> <sup>E</sup> |           |           |           |
| Cartesian Coordinates (Å)                                          |           |           |           | Cartesian Coordinates (Å)                                          |           |           |           |
| C                                                                  | 0.010581  | -0.029659 | -0.008996 | C                                                                  | 0.027026  | -0.022146 | -0.023633 |
| C                                                                  | -0.003236 | -0.028864 | 1.518712  | C                                                                  | 0.020896  | -0.018513 | 1.504565  |
| C                                                                  | 1.487353  | 0.030202  | 1.957401  | C                                                                  | 1.511775  | 0.011743  | 1.932595  |
| C                                                                  | 2.198861  | 0.876729  | 0.902347  | C                                                                  | 2.210718  | 0.887074  | 0.898539  |
| H                                                                  | 1.245598  | 0.582756  | -0.04835  | C                                                                  | 3.630958  | 0.573326  | 0.499628  |
| H                                                                  | -0.519327 | -0.900272 | 1.939902  | H                                                                  | 1.268519  | 0.583972  | -0.063759 |
| H                                                                  | -0.532786 | 0.85725   | 1.885135  | H                                                                  | -0.5133   | -0.876005 | 1.931772  |
| H                                                                  | 1.911131  | -0.979899 | 1.97061   | H                                                                  | -0.482188 | 0.883866  | 1.8702    |
| H                                                                  | 1.599846  | 0.431895  | 2.971863  | H                                                                  | 1.931854  | -1.00149  | 1.894641  |
| C                                                                  | 0.141105  | -1.364247 | -0.711415 | H                                                                  | 1.641631  | 0.36545   | 2.962381  |

|   |           |           |           |   |           |           |           |
|---|-----------|-----------|-----------|---|-----------|-----------|-----------|
| H | -0.762426 | -1.964918 | -0.516037 | H | 2.023609  | 1.955743  | 1.0438    |
| H | 0.970688  | -1.935039 | -0.272542 | H | 3.744266  | -0.479183 | 0.215324  |
| H | -0.70765  | 0.63943   | -0.488611 | H | 3.959983  | 1.188091  | -0.34496  |
| C | 2.196838  | 2.376599  | 1.096811  | H | 4.335594  | 0.757847  | 1.325229  |
| H | 2.816851  | 2.667907  | 1.957537  | C | 0.12804   | -1.359884 | -0.724772 |
| H | 2.590945  | 2.899812  | 0.219609  | H | -0.786404 | -1.942398 | -0.524075 |
| H | 1.187377  | 2.759029  | 1.287097  | H | 0.947508  | -1.948099 | -0.290043 |
| H | 3.155056  | 0.484645  | 0.551787  | H | -0.683598 | 0.657966  | -0.499055 |
| C | 0.346287  | -1.239293 | -2.22428  | C | 0.326665  | -1.241631 | -2.239143 |
| H | 0.41281   | -2.221843 | -2.701922 | H | 0.368431  | -2.226192 | -2.715527 |
| H | -0.484808 | -0.697797 | -2.689868 | H | -0.495385 | -0.682797 | -2.700268 |
| H | 1.266137  | -0.690597 | -2.452477 | H | 1.256683  | -0.713568 | -2.474643 |

| 2-Heptyl: 5s <sub>β</sub> Fs <sub>α</sub> <sup>E</sup> |           |           |           |
|--------------------------------------------------------|-----------|-----------|-----------|
| Cartesian Coordinates (Å)                              |           |           |           |
| C                                                      | 0.021135  | 0.035936  | -0.030462 |
| C                                                      | 0.015346  | 0.024802  | 1.477398  |
| C                                                      | 1.339664  | 0.005274  | 2.232671  |
| C                                                      | 1.065491  | -0.825341 | 3.509946  |
| C                                                      | 0.14101   | -1.952541 | 3.063061  |
| C                                                      | -0.920266 | -2.466217 | 4.005627  |
| C                                                      | -1.86673  | -3.485544 | 3.362108  |
| H                                                      | -0.361249 | -1.184567 | 2.028416  |
| H                                                      | -0.720353 | 0.704715  | 1.918891  |
| H                                                      | 1.730574  | 1.004671  | 2.458004  |
| H                                                      | 2.097632  | -0.501955 | 1.621298  |
| H                                                      | 0.545138  | -0.201542 | 4.248554  |
| H                                                      | 1.987768  | -1.178661 | 3.985953  |
| H                                                      | 0.660674  | -2.748382 | 2.517872  |
| H                                                      | -1.498769 | -1.619152 | 4.398915  |
| H                                                      | -0.442133 | -2.926819 | 4.886703  |
| H                                                      | -0.987476 | -0.083493 | -0.440167 |
| H                                                      | 0.4211    | 0.980674  | -0.42991  |
| H                                                      | 0.646267  | -0.769389 | -0.433226 |
| H                                                      | -2.614805 | -3.842795 | 4.076699  |
| H                                                      | -2.396475 | -3.046454 | 2.51013   |
| H                                                      | -1.314728 | -4.357316 | 2.99367   |

| 2-Heptyl: 6s <sub>α</sub> As <sub>α</sub> <sup>A</sup> |           |           |           |
|--------------------------------------------------------|-----------|-----------|-----------|
| Cartesian Coordinates (Å)                              |           |           |           |
| C                                                      | -0.0144   | -0.019932 | -0.000896 |
| C                                                      | -0.009556 | -0.007278 | 1.523032  |
| C                                                      | 1.420683  | 0.008679  | 2.100494  |
| C                                                      | 2.205125  | 1.240355  | 1.604399  |
| C                                                      | 2.303875  | 1.285683  | 0.084294  |
| H                                                      | 1.110029  | 0.711956  | -0.233896 |
| H                                                      | 1.698707  | 2.143185  | 1.968197  |
| H                                                      | 3.207526  | 1.244258  | 2.058737  |
| H                                                      | 1.38128   | 0.007176  | 3.195436  |
| H                                                      | 1.948524  | -0.909175 | 1.810995  |
| H                                                      | -0.539748 | 0.88199   | 1.886489  |
| H                                                      | -0.555949 | -0.876324 | 1.919735  |
| H                                                      | -0.81857  | 0.572022  | -0.444497 |
| C                                                      | 0.162144  | -1.366293 | -0.672083 |
| H                                                      | -0.703992 | -2.01994  | -0.489829 |
| H                                                      | 0.271911  | -1.267105 | -1.756914 |
| H                                                      | 1.044508  | -1.896643 | -0.296798 |
| C                                                      | 3.40072   | 0.45897   | -0.554294 |
| H                                                      | 3.317256  | 0.449253  | -1.645951 |
| H                                                      | 4.396425  | 0.856413  | -0.306611 |
| H                                                      | 3.380776  | -0.581622 | -0.21167  |
| H                                                      | 2.237499  | 2.293771  | -0.331911 |

| 2-Heptyl: 6s <sub>α</sub> As <sub>α</sub> <sup>E</sup> |           |           |           |
|--------------------------------------------------------|-----------|-----------|-----------|
| Cartesian Coordinates (Å)                              |           |           |           |
| C                                                      | -0.009512 | -0.024562 | -0.000961 |
| C                                                      | -0.001413 | -0.019316 | 1.522649  |

| 2-Heptyl: 6s <sub>α</sub> Fs <sub>α</sub> <sup>E</sup> |           |           |           |
|--------------------------------------------------------|-----------|-----------|-----------|
| Cartesian Coordinates (Å)                              |           |           |           |
| C                                                      | -0.024757 | -0.001236 | -0.002185 |
| C                                                      | -0.009278 | -0.01084  | 1.517595  |



|   |           |           |           |   |           |           |           |
|---|-----------|-----------|-----------|---|-----------|-----------|-----------|
| C | 1.429221  | 0.011011  | 2.101528  | C | 1.42581   | 0.005156  | 2.07726   |
| C | 2.206886  | 1.238428  | 1.594284  | C | 2.193065  | 1.251625  | 1.598437  |
| C | 2.32336   | 1.243292  | 0.079311  | C | 2.282511  | 1.312258  | 0.082562  |
| H | 1.108037  | 0.715581  | -0.23804  | H | 1.072189  | 0.773037  | -0.237284 |
| H | 2.996195  | 0.463147  | -0.292025 | H | 2.960616  | 0.556118  | -0.326777 |
| H | 1.685668  | 2.149476  | 1.921388  | H | 1.675558  | 2.148356  | 1.968013  |
| H | 3.200848  | 1.271211  | 2.065597  | H | 3.194824  | 1.270235  | 2.053422  |
| H | 1.386296  | 0.016496  | 3.196321  | H | 1.402311  | -0.024612 | 3.17227   |
| H | 1.966053  | -0.903986 | 1.817527  | H | 1.956907  | -0.899796 | 1.751068  |
| H | -0.541304 | 0.862077  | 1.890916  | H | -0.543535 | 0.874108  | 1.891694  |
| H | -0.537183 | -0.896082 | 1.916921  | H | -0.553212 | -0.882463 | 1.911459  |
| H | -0.82678  | 0.551972  | -0.440646 | C | 2.456692  | 2.672779  | -0.553547 |
| C | 2.525239  | 2.577169  | -0.602802 | H | 3.411018  | 3.137895  | -0.262516 |
| H | 3.479873  | 3.041516  | -0.311856 | H | 2.446525  | 2.613966  | -1.646776 |
| H | 2.533296  | 2.478427  | -1.693156 | H | 1.661285  | 3.362099  | -0.246684 |
| H | 1.732622  | 3.285938  | -0.33542  | C | -1.246845 | 0.570402  | -0.684873 |
| C | 0.200783  | -1.362916 | -0.678506 | H | -1.132083 | 0.58895   | -1.77357  |
| H | -0.636012 | -2.048859 | -0.480245 | H | -2.149591 | -0.019696 | -0.464191 |
| H | 0.285487  | -1.25697  | -1.764965 | H | -1.44824  | 1.595055  | -0.350855 |
| H | 1.110935  | -1.859101 | -0.322518 | H | 0.299959  | -0.955406 | -0.430169 |

| 3-Hexyl: 3s <sub>sp</sub> |           |           |           | 3-Heptyl: 4s <sub>sp</sub> |           |           |           |
|---------------------------|-----------|-----------|-----------|----------------------------|-----------|-----------|-----------|
| Cartesian Coordinates (Å) |           |           |           | Cartesian Coordinates (Å)  |           |           |           |
| C                         | -0.019629 | 0.00328   | -0.021495 | C                          | -0.057904 | -0.088567 | -0.053901 |
| C                         | -0.011276 | -0.00371  | 1.511317  | C                          | -0.014023 | 0.029825  | 1.449842  |
| C                         | 1.367816  | 0.005787  | 2.107043  | C                          | 1.334149  | 0.059845  | 2.182595  |
| C                         | 1.619291  | -0.46528  | 3.504599  | C                          | 1.097582  | 1.467244  | 2.747027  |
| C                         | 2.74668   | 0.08233   | 4.332303  | C                          | 2.02187   | 2.59989   | 2.372838  |
| C                         | 3.183802  | -0.842283 | 5.476331  | C                          | 1.493476  | 3.978916  | 2.778897  |
| C                         | 4.302249  | -0.248094 | 6.335935  | H                          | -0.063188 | 1.348958  | 1.951449  |
| H                         | 1.910971  | -1.132959 | 2.426341  | H                          | 0.727241  | 1.48805   | 3.774418  |
| H                         | 0.769333  | -0.911713 | 4.01523   | H                          | 2.183555  | 0.026333  | 1.492099  |
| H                         | 2.109464  | 0.684061  | 1.691923  | H                          | 1.476433  | -0.724828 | 2.930192  |
| H                         | 3.609884  | 0.290376  | 3.683842  | H                          | 2.20719   | 2.578147  | 1.290185  |
| H                         | 2.460448  | 1.063277  | 4.753111  | H                          | 3.007859  | 2.435411  | 2.839613  |
| H                         | -0.558239 | -0.883427 | 1.877134  | H                          | -0.808413 | -0.498312 | 1.982029  |
| H                         | -0.582806 | 0.865201  | 1.881998  | H                          | 0.675132  | 0.59964   | -0.496698 |
| H                         | 2.314193  | -1.06515  | 6.108699  | H                          | 0.275232  | -1.09765  | -0.350321 |
| H                         | 3.505693  | -1.803091 | 5.055673  | H                          | 1.330843  | 4.035368  | 3.860917  |
| H                         | -1.041186 | 0.023021  | -0.413943 | H                          | 0.536957  | 4.190763  | 2.290059  |
| H                         | 0.503795  | 0.882787  | -0.412596 | C                          | -1.443942 | 0.181432  | -0.64705  |
| H                         | 0.482814  | -0.883815 | -0.420528 | H                          | -1.439899 | 0.072873  | -1.736094 |

|   |          |           |          |   |           |           |           |
|---|----------|-----------|----------|---|-----------|-----------|-----------|
| H | 4.59028  | -0.927648 | 7.144153 | H | -2.186877 | -0.516429 | -0.245248 |
| H | 5.197638 | -0.045739 | 5.737202 | H | -1.780653 | 1.195403  | -0.407862 |
| H | 3.991407 | 0.698575  | 6.792056 | H | 2.196957  | 4.771736  | 2.50614   |

| 3-Heptyl: 4's <sub>β</sub> s <sub>β</sub> |           |           |           |
|-------------------------------------------|-----------|-----------|-----------|
| Cartesian Coordinates (Å)                 |           |           |           |
| C                                         | 0.01184   | 0.027005  | -0.034587 |
| C                                         | 0.008067  | 0.018543  | 1.475776  |
| C                                         | 1.338987  | -0.013979 | 2.243623  |
| C                                         | 1.070023  | -1.410663 | 2.821484  |
| C                                         | 0.79752   | -1.566829 | 4.297148  |
| C                                         | 0.265753  | -2.951794 | 4.677594  |
| H                                         | -0.101036 | -1.263223 | 2.050845  |
| H                                         | 1.640218  | -2.220574 | 2.361441  |
| H                                         | 1.442667  | 0.764581  | 3.005016  |
| H                                         | 2.217042  | 0.032812  | 1.59264   |
| H                                         | -0.773517 | 0.61897   | 1.94615   |
| H                                         | 0.08509   | -0.794562 | 4.619041  |
| H                                         | 1.722282  | -1.363167 | 4.862894  |
| H                                         | -0.976761 | -0.265837 | -0.407947 |
| H                                         | 0.717397  | -0.730442 | -0.402253 |
| H                                         | 0.974507  | -3.737215 | 4.392546  |
| H                                         | -0.680942 | -3.16132  | 4.168967  |
| H                                         | 0.096245  | -3.03181  | 5.75588   |
| C                                         | 0.390314  | 1.39502   | -0.632067 |
| H                                         | 1.385779  | 1.710578  | -0.302497 |
| H                                         | 0.395721  | 1.359509  | -1.72706  |
| H                                         | -0.321251 | 2.168501  | -0.324028 |

| 2-Octyl: 3s <sub>β</sub> s <sub>α</sub> |           |           |           |
|-----------------------------------------|-----------|-----------|-----------|
| Cartesian Coordinates (Å)               |           |           |           |
| C                                       | -0.019578 | 0.016875  | -0.027032 |
| C                                       | -0.008511 | -0.015019 | 1.472979  |
| C                                       | 1.278828  | -0.010072 | 2.236166  |
| C                                       | 1.392405  | -0.645786 | 3.592279  |
| C                                       | 2.549607  | -0.101840 | 4.440677  |
| C                                       | 2.669063  | -0.775647 | 5.811048  |
| C                                       | 3.826304  | -0.237609 | 6.659333  |
| C                                       | 3.933967  | -0.911497 | 8.030044  |
| H                                       | 0.482398  | 1.010768  | 2.102918  |
| H                                       | 2.181964  | 0.122966  | 1.645195  |
| H                                       | -0.870084 | -0.416920 | 1.998435  |
| H                                       | 0.447631  | -0.510221 | 4.137884  |
| H                                       | 1.507798  | -1.739411 | 3.484376  |
| H                                       | -0.990492 | 0.331446  | -0.421947 |
| H                                       | 0.735538  | 0.710763  | -0.415737 |
| H                                       | 0.210532  | -0.970699 | -0.458836 |
| H                                       | 3.491543  | -0.229275 | 3.889082  |
| H                                       | 2.420429  | 0.980840  | 4.570554  |
| H                                       | 2.792590  | -1.859410 | 5.674911  |
| H                                       | 1.726721  | -0.648038 | 6.362659  |
| H                                       | 3.703934  | 0.845630  | 6.792270  |
| H                                       | 4.768354  | -0.369427 | 6.110614  |
| H                                       | 4.768365  | -0.507034 | 8.611717  |
| H                                       | 3.018976  | -0.765926 | 8.615227  |
| H                                       | 4.091023  | -1.991305 | 7.929111  |

| 2-Octyl: 4's <sub>β</sub> s <sub>α</sub> |           |           |           |
|------------------------------------------|-----------|-----------|-----------|
| Cartesian Coordinates (Å)                |           |           |           |
| C                                        | -0.071060 | -0.205137 | -0.021699 |
| C                                        | -0.010782 | -0.054688 | 1.476828  |
| C                                        | 1.349469  | 0.028080  | 2.184427  |
| C                                        | 1.081230  | 1.438610  | 2.727160  |
| C                                        | 1.962348  | 2.590905  | 2.312057  |
| C                                        | 1.404338  | 3.966458  | 2.694948  |
| C                                        | 2.315699  | 5.129265  | 2.289222  |
| C                                        | 1.751993  | 6.499989  | 2.673032  |

| 2-Octyl: 4's <sub>β</sub> s <sub>α</sub> |           |           |           |
|------------------------------------------|-----------|-----------|-----------|
| Cartesian Coordinates (Å)                |           |           |           |
| C                                        | 0.013021  | 0.060257  | -0.054536 |
| C                                        | 0.011450  | 0.031120  | 1.452159  |
| C                                        | 1.346364  | -0.012122 | 2.210900  |
| C                                        | 1.092418  | -1.425357 | 2.754935  |
| C                                        | 0.840676  | -1.623586 | 4.229053  |
| C                                        | 0.322317  | -3.021424 | 4.585786  |
| C                                        | 0.085205  | -3.221753 | 6.086102  |
| C                                        | -0.427539 | -4.621934 | 6.433333  |

|   |           |           |           |   |           |           |           |
|---|-----------|-----------|-----------|---|-----------|-----------|-----------|
| H | -0.088930 | 1.269862  | 1.956213  | H | -0.089346 | -1.262357 | 2.002894  |
| H | 0.730737  | 1.468123  | 3.761203  | H | 1.660920  | -2.218624 | 2.265017  |
| H | 2.187396  | 0.005944  | 1.479702  | H | 1.444420  | 0.747566  | 2.992013  |
| H | 1.527974  | -0.737359 | 2.944203  | H | 2.220062  | 0.061455  | 1.556804  |
| H | 2.130143  | 2.552459  | 1.226130  | H | -0.769399 | 0.619366  | 1.936456  |
| H | 2.962385  | 2.468688  | 2.764005  | H | 0.126779  | -0.865517 | 4.582974  |
| H | -0.777259 | -0.593999 | 2.035638  | H | 1.771568  | -1.429509 | 4.789996  |
| H | -1.083197 | -0.041922 | -0.404574 | H | -0.984935 | -0.122650 | -0.464808 |
| H | 0.596352  | 0.505944  | -0.522534 | H | 0.353768  | 1.033872  | -0.439108 |
| H | 0.242291  | -1.211900 | -0.338604 | H | 0.689856  | -0.697430 | -0.467145 |
| H | 1.235227  | 3.999025  | 3.780418  | H | 1.038264  | -3.774667 | 4.227924  |
| H | 0.416645  | 4.094791  | 2.232220  | H | -0.611137 | -3.209176 | 4.038407  |
| H | 3.302038  | 4.995324  | 2.753342  | H | 1.019690  | -3.028440 | 6.629760  |
| H | 2.485815  | 5.093933  | 1.204772  | H | -0.631883 | -2.470114 | 6.442495  |
| H | 1.603127  | 6.577885  | 3.755898  | H | 0.284902  | -5.393257 | 6.119746  |
| H | 2.424538  | 7.309055  | 2.370917  | H | -0.587283 | -4.735118 | 7.510292  |
| H | 0.782173  | 6.677322  | 2.194639  | H | -1.379384 | -4.830753 | 5.932088  |

| 2-Octyl: 5s <sub>B</sub> <sup>As<sub>d</sub>A</sup> |           |           |           | 2-Octyl: 5s <sub>B</sub> <sup>As<sub>d</sub>E</sup> |           |           |           |
|-----------------------------------------------------|-----------|-----------|-----------|-----------------------------------------------------|-----------|-----------|-----------|
| Cartesian Coordinates (Å)                           |           |           |           | Cartesian Coordinates (Å)                           |           |           |           |
| C                                                   | 0.021626  | -0.030886 | -0.006316 | C                                                   | 0.052588  | -0.031768 | -0.029826 |
| C                                                   | -0.003115 | -0.022640 | 1.521452  | C                                                   | 0.025282  | -0.022500 | 1.498324  |
| C                                                   | 1.484119  | 0.042434  | 1.970253  | C                                                   | 1.509498  | 0.028067  | 1.946844  |
| C                                                   | 2.200111  | 0.887499  | 0.917072  | C                                                   | 2.211273  | 0.909222  | 0.919697  |
| H                                                   | 1.253968  | 0.586686  | -0.038933 | C                                                   | 3.640744  | 0.612721  | 0.541102  |
| H                                                   | -0.520180 | -0.893006 | 1.943479  | H                                                   | 1.285846  | 0.591103  | -0.054447 |
| H                                                   | -0.537230 | 0.864283  | 1.879256  | H                                                   | -0.504296 | -0.884685 | 1.921688  |
| H                                                   | 1.910734  | -0.966361 | 1.989720  | H                                                   | -0.493702 | 0.875276  | 1.852950  |
| H                                                   | 1.588433  | 0.447931  | 2.984078  | H                                                   | 1.942970  | -0.979790 | 1.918062  |
| C                                                   | 0.163091  | -1.367986 | -0.700899 | H                                                   | 1.620533  | 0.386583  | 2.977173  |
| H                                                   | -0.740538 | -1.972842 | -0.513343 | H                                                   | 2.008417  | 1.975806  | 1.058966  |
| H                                                   | 0.990554  | -1.936245 | -0.252351 | H                                                   | 3.771817  | -0.439318 | 0.262734  |
| H                                                   | -0.696299 | 0.632877  | -0.493556 | H                                                   | 3.972954  | 1.228436  | -0.301548 |
| C                                                   | 2.191808  | 2.388057  | 1.105870  | H                                                   | 4.331801  | 0.809782  | 1.375257  |
| H                                                   | 2.804884  | 2.684670  | 1.969757  | C                                                   | 0.181666  | -1.370098 | -0.724316 |
| H                                                   | 2.590247  | 2.909264  | 0.229430  | H                                                   | -0.727963 | -1.966242 | -0.536707 |
| H                                                   | 1.179801  | 2.767824  | 1.287727  | H                                                   | 1.002865  | -1.947966 | -0.276622 |
| H                                                   | 3.159924  | 0.497302  | 0.574383  | H                                                   | -0.660958 | 0.636970  | -0.516699 |
| C                                                   | 0.383256  | -1.258788 | -2.214577 | C                                                   | 0.401431  | -1.263371 | -2.238315 |
| H                                                   | -0.440738 | -0.682553 | -2.656048 | H                                                   | -0.416009 | -0.676896 | -2.678473 |
| H                                                   | 1.294284  | -0.676859 | -2.403458 | H                                                   | 1.319173  | -0.692634 | -2.428808 |
| C                                                   | 0.485998  | -2.619376 | -2.908620 | C                                                   | 0.486026  | -2.624998 | -2.932728 |

|   |           |           |           |   |           |           |           |
|---|-----------|-----------|-----------|---|-----------|-----------|-----------|
| H | -0.426941 | -3.207896 | -2.763240 | H | -0.434395 | -3.201623 | -2.786781 |
| H | 0.642081  | -2.508841 | -3.986362 | H | 0.642699  | -2.516282 | -4.010566 |
| H | 1.321743  | -3.205527 | -2.510039 | H | 1.314329  | -3.222226 | -2.534999 |

| 2-Octyl: 5s <sub>B</sub> <sup>E</sup> s <sub>d</sub> <sup>E</sup> |           |           |           |
|-------------------------------------------------------------------|-----------|-----------|-----------|
| Cartesian Coordinates (Å)                                         |           |           |           |
| C                                                                 | 0.031642  | 0.050138  | -0.034180 |
| C                                                                 | 0.022792  | 0.032987  | 1.473600  |
| C                                                                 | 1.345594  | 0.005278  | 2.231141  |
| C                                                                 | 1.065327  | -0.828153 | 3.505062  |
| C                                                                 | 0.136863  | -1.950401 | 3.053062  |
| C                                                                 | -0.926938 | -2.461359 | 3.993652  |
| C                                                                 | -1.880400 | -3.481406 | 3.357522  |
| C                                                                 | -2.947987 | -3.994196 | 4.327153  |
| H                                                                 | -0.359891 | -1.177016 | 2.019827  |
| H                                                                 | -0.710930 | 0.714238  | 1.916335  |
| H                                                                 | 1.740346  | 1.002264  | 2.460525  |
| H                                                                 | 2.102538  | -0.503171 | 1.619507  |
| H                                                                 | 0.546137  | -0.204503 | 4.244556  |
| H                                                                 | 1.984997  | -1.187078 | 3.981925  |
| H                                                                 | 0.654953  | -2.746534 | 2.506970  |
| H                                                                 | -1.506074 | -1.613311 | 4.386683  |
| H                                                                 | -0.452601 | -2.923318 | 4.877431  |
| H                                                                 | -0.976626 | -0.062950 | -0.446499 |
| H                                                                 | 0.436847  | 0.994657  | -0.428857 |
| H                                                                 | 0.653961  | -0.756367 | -0.438936 |
| H                                                                 | -2.363125 | -3.024868 | 2.483965  |
| H                                                                 | -1.296451 | -4.327849 | 2.972635  |
| H                                                                 | -3.613004 | -4.717243 | 3.844407  |
| H                                                                 | -2.493324 | -4.487349 | 5.193766  |
| H                                                                 | -3.567603 | -3.172725 | 4.704180  |

| 2-Octyl: 6s <sub>B</sub> <sup>A</sup> s <sub>d</sub> <sup>A</sup> |           |           |           |
|-------------------------------------------------------------------|-----------|-----------|-----------|
| Cartesian Coordinates (Å)                                         |           |           |           |
| C                                                                 | 0.005609  | -0.015238 | -0.013009 |
| C                                                                 | -0.004131 | -0.007134 | 1.510915  |
| C                                                                 | 1.418045  | 0.010135  | 2.108015  |
| C                                                                 | 2.208930  | 1.239575  | 1.618073  |
| C                                                                 | 2.336160  | 1.272709  | 0.099994  |
| H                                                                 | 1.144663  | 0.701662  | -0.237113 |
| H                                                                 | 1.693925  | 2.144088  | 1.965315  |
| H                                                                 | 3.202808  | 1.249360  | 2.090694  |
| H                                                                 | 1.362532  | 0.013187  | 3.202281  |
| H                                                                 | 1.949831  | -0.908904 | 1.829782  |
| H                                                                 | -0.540731 | 0.879414  | 1.871429  |
| H                                                                 | -0.553534 | -0.878549 | 1.898117  |
| H                                                                 | -0.786152 | 0.590909  | -0.462768 |
| C                                                                 | 0.158459  | -1.361904 | -0.693114 |
| H                                                                 | -0.688614 | -2.007986 | -0.408149 |
| H                                                                 | 1.053052  | -1.874219 | -0.314439 |
| C                                                                 | 3.446017  | 0.440449  | -0.508369 |
| H                                                                 | 3.392992  | 0.429989  | -1.601940 |
| H                                                                 | 4.436264  | 0.834395  | -0.234491 |
| H                                                                 | 3.413054  | -0.599611 | -0.165024 |
| H                                                                 | 2.280227  | 2.277683  | -0.325201 |
| C                                                                 | 0.226676  | -1.271077 | -2.220763 |
| H                                                                 | 0.306320  | -2.262567 | -2.677590 |
| H                                                                 | -0.670525 | -0.788795 | -2.624852 |
| H                                                                 | 1.090923  | -0.681950 | -2.545020 |

| 2-Octyl: 6s <sub>B</sub> <sup>A</sup> s <sub>d</sub> <sup>E</sup> |           |           |           |
|-------------------------------------------------------------------|-----------|-----------|-----------|
| Cartesian Coordinates (Å)                                         |           |           |           |
| C                                                                 | 0.052588  | -0.031768 | -0.029826 |
| C                                                                 | 0.025282  | -0.022500 | 1.498324  |
| C                                                                 | 1.509498  | 0.028067  | 1.946844  |
| C                                                                 | 2.211273  | 0.909222  | 0.919697  |
| C                                                                 | 3.640744  | 0.612721  | 0.541102  |
| H                                                                 | 1.285846  | 0.591103  | -0.054447 |
| H                                                                 | -0.504296 | -0.884685 | 1.921688  |
| H                                                                 | -0.493702 | 0.875276  | 1.852950  |

| 2-Octyl: 6s <sub>B</sub> <sup>E</sup> s <sub>d</sub> <sup>E</sup> |           |          |           |
|-------------------------------------------------------------------|-----------|----------|-----------|
| Cartesian Coordinates (Å)                                         |           |          |           |
| C                                                                 | -0.007010 | 0.020191 | -0.020438 |
| C                                                                 | -0.005288 | 0.004075 | 1.499178  |
| C                                                                 | 1.424182  | 0.001907 | 2.073625  |
| C                                                                 | 2.210855  | 1.240602 | 1.606715  |
| C                                                                 | 2.318649  | 1.303022 | 0.092298  |
| H                                                                 | 1.105031  | 0.780188 | -0.244029 |
| H                                                                 | 2.991256  | 0.538683 | -0.310788 |
| H                                                                 | 1.699385  | 2.142455 | 1.972220  |

|   |           |           |           |   |           |           |           |
|---|-----------|-----------|-----------|---|-----------|-----------|-----------|
| H | 1.942970  | -0.979790 | 1.918062  | H | 3.207455  | 1.246842  | 2.073282  |
| H | 1.620533  | 0.386583  | 2.977173  | H | 1.388469  | -0.030713 | 3.168226  |
| H | 2.008417  | 1.975806  | 1.058966  | H | 1.948081  | -0.908197 | 1.750265  |
| H | 3.771817  | -0.439318 | 0.262734  | H | -0.533481 | 0.892854  | 1.872698  |
| H | 3.972954  | 1.228436  | -0.301548 | H | -0.561807 | -0.863585 | 1.883808  |
| H | 4.331801  | 0.809782  | 1.375257  | C | 2.519172  | 2.662338  | -0.538776 |
| C | 0.181666  | -1.370098 | -0.724316 | H | 3.477925  | 3.112139  | -0.238531 |
| H | -0.727963 | -1.966242 | -0.536707 | H | 2.518075  | 2.606367  | -1.632351 |
| H | 1.002865  | -1.947966 | -0.276622 | H | 1.731782  | 3.363092  | -0.237154 |
| H | -0.660958 | 0.636970  | -0.516699 | C | -1.214345 | 0.612203  | -0.715612 |
| C | 0.401431  | -1.263371 | -2.238315 | H | -2.119621 | 0.053796  | -0.422785 |
| H | -0.416009 | -0.676896 | -2.678473 | H | -1.377175 | 1.637132  | -0.354569 |
| H | 1.319173  | -0.692634 | -2.428808 | H | 0.304700  | -0.938029 | -0.451817 |
| C | 0.486026  | -2.624998 | -2.932728 | C | -1.101738 | 0.614875  | -2.243513 |
| H | -0.434395 | -3.201623 | -2.786781 | H | -1.997449 | 1.037311  | -2.709622 |
| H | 0.642699  | -2.516282 | -4.010566 | H | -0.240541 | 1.204941  | -2.574756 |
| H | 1.314329  | -3.222226 | -2.534999 | H | -0.972956 | -0.402146 | -2.630352 |

| 2-Octyl: 7s <sub>a</sub> <sup>A</sup> s <sub>a</sub> <sup>A</sup> |           |           |           | 2-Octyl: 7s <sub>a</sub> <sup>A</sup> s <sub>a</sub> <sup>E</sup> |           |           |           |
|-------------------------------------------------------------------|-----------|-----------|-----------|-------------------------------------------------------------------|-----------|-----------|-----------|
| Cartesian Coordinates (Å)                                         |           |           |           | Cartesian Coordinates (Å)                                         |           |           |           |
| C                                                                 | -0.013517 | 0.020348  | 0.017728  | C                                                                 | 0.022792  | -0.035253 | -0.025122 |
| C                                                                 | 0.013020  | 0.051329  | 1.538274  | C                                                                 | 0.012581  | -0.009336 | 1.487757  |
| C                                                                 | 1.413016  | 0.018058  | 2.184750  | C                                                                 | 1.363369  | -0.042589 | 2.175310  |
| C                                                                 | 2.182160  | -1.311179 | 2.062348  | C                                                                 | 1.316259  | 0.200307  | 3.695322  |
| C                                                                 | 2.772441  | -1.626235 | 0.672744  | C                                                                 | 0.991498  | 1.637893  | 4.144427  |
| C                                                                 | 1.761900  | -1.964277 | -0.412175 | C                                                                 | -0.466046 | 2.100454  | 3.945684  |
| H                                                                 | -0.567529 | -0.795529 | 1.927088  | C                                                                 | -0.900128 | 2.314053  | 2.503585  |
| H                                                                 | -0.507690 | 0.956515  | 1.890002  | H                                                                 | -0.691384 | -0.728019 | 1.922112  |
| H                                                                 | 1.291012  | 0.240523  | 3.251989  | H                                                                 | 2.028392  | 0.701297  | 1.712696  |
| H                                                                 | 2.031835  | 0.831316  | 1.782089  | H                                                                 | 1.842474  | -1.017726 | 1.990972  |
| H                                                                 | 1.532989  | -2.134612 | 2.389193  | H                                                                 | 2.293745  | -0.069653 | 4.113518  |
| H                                                                 | 3.012751  | -1.287829 | 2.778510  | H                                                                 | 0.593546  | -0.492587 | 4.149816  |
| H                                                                 | 3.376303  | -0.767738 | 0.350585  | H                                                                 | 1.676971  | 2.334624  | 3.643464  |
| H                                                                 | 3.479910  | -2.464106 | 0.781188  | H                                                                 | 1.222216  | 1.715986  | 5.214068  |
| H                                                                 | 0.827017  | -0.989553 | -0.312164 | H                                                                 | -1.131042 | 1.364154  | 4.416035  |
| C                                                                 | 1.028023  | -3.283846 | -0.281909 | H                                                                 | -0.610170 | 3.036399  | 4.509080  |
| H                                                                 | 0.301057  | -3.418271 | -1.089377 | H                                                                 | -0.530238 | 1.165727  | 1.885422  |
| H                                                                 | 1.724268  | -4.134690 | -0.323132 | H                                                                 | 0.459350  | -0.968689 | -0.411279 |
| H                                                                 | 0.484975  | -3.362365 | 0.666415  | H                                                                 | -0.987858 | 0.045317  | -0.438558 |
| H                                                                 | 2.161885  | -1.809378 | -1.418415 | H                                                                 | 0.619405  | 0.788443  | -0.434584 |
| H                                                                 | -0.971999 | -0.330292 | -0.375935 | C                                                                 | -0.256275 | 3.460812  | 1.750697  |
| C                                                                 | 0.488544  | 1.253563  | -0.705659 | H                                                                 | -0.613506 | 3.511155  | 0.717142  |

|   |           |          |           |   |           |          |          |
|---|-----------|----------|-----------|---|-----------|----------|----------|
| H | 0.467146  | 1.116104 | -1.791596 | H | -0.485057 | 4.428232 | 2.222752 |
| H | -0.130306 | 2.133396 | -0.474858 | H | 0.835224  | 3.373750 | 1.718604 |
| H | 1.517357  | 1.505380 | -0.425995 | H | -1.988341 | 2.303992 | 2.391908 |

| 2-Octyl: 7s <sub>d</sub> <sup>E</sup> s <sub>d</sub> <sup>E</sup> |           |           |           | 3-Octyl: 3s <sub>p</sub> s <sub>p</sub> |           |           |           |
|-------------------------------------------------------------------|-----------|-----------|-----------|-----------------------------------------|-----------|-----------|-----------|
| Cartesian Coordinates (Å)                                         |           |           |           | Cartesian Coordinates (Å)               |           |           |           |
| C                                                                 | 0.027107  | -0.017859 | -0.029974 | C                                       | -0.024360 | 0.005079  | -0.023828 |
| C                                                                 | 0.017357  | -0.011330 | 1.483014  | C                                       | -0.013888 | -0.001088 | 1.508974  |
| C                                                                 | 1.370369  | -0.015378 | 2.167513  | C                                       | 1.365952  | 0.007965  | 2.103046  |
| C                                                                 | 1.318703  | 0.179834  | 3.693907  | C                                       | 1.618864  | -0.464884 | 3.499732  |
| C                                                                 | 0.934593  | 1.587549  | 4.189240  | C                                       | 2.746797  | 0.081668  | 4.327814  |
| C                                                                 | -0.531563 | 2.007567  | 3.979309  | C                                       | 3.183223  | -0.845571 | 5.469561  |
| C                                                                 | -0.909457 | 2.284110  | 2.537088  | C                                       | 4.300271  | -0.260456 | 6.339822  |
| C                                                                 | -2.376862 | 2.526565  | 2.259840  | C                                       | 4.727161  | -1.190930 | 7.478145  |
| H                                                                 | -0.668420 | -0.751159 | 1.910686  | H                                       | 1.909525  | -1.131153 | 2.420302  |
| H                                                                 | 2.004099  | 0.767732  | 1.725888  | H                                       | 0.769491  | -0.912321 | 4.010419  |
| H                                                                 | 1.885684  | -0.965421 | 1.952860  | H                                       | 2.107084  | 0.686768  | 1.687874  |
| H                                                                 | 2.307944  | -0.061061 | 4.102048  | H                                       | 3.609317  | 0.290543  | 3.678875  |
| H                                                                 | 0.627249  | -0.556098 | 4.128815  | H                                       | 2.460006  | 1.061881  | 4.749669  |
| H                                                                 | 1.594018  | 2.328767  | 3.715404  | H                                       | -0.560760 | -0.880381 | 1.875938  |
| H                                                                 | 1.152951  | 1.636154  | 5.263150  | H                                       | -0.584544 | 0.868255  | 1.879985  |
| H                                                                 | -1.191347 | 1.226640  | 4.385260  | H                                       | 2.313116  | -1.072904 | 6.101500  |
| H                                                                 | -0.730257 | 2.904821  | 4.587295  | H                                       | 3.507966  | -1.806141 | 5.047858  |
| H                                                                 | -0.255908 | 3.029535  | 2.070396  | H                                       | -1.046463 | 0.025372  | -0.414842 |
| H                                                                 | -0.540207 | 1.151230  | 1.893727  | H                                       | 0.499196  | 0.883945  | -0.416183 |
| H                                                                 | -2.745188 | 3.420391  | 2.785575  | H                                       | 0.476825  | -0.882646 | -0.423048 |
| H                                                                 | -2.569384 | 2.675514  | 1.192445  | H                                       | 5.169324  | -0.031490 | 5.708334  |
| H                                                                 | -2.991066 | 1.683186  | 2.597284  | H                                       | 3.969036  | 0.700241  | 6.756229  |
| H                                                                 | 0.497451  | -0.929542 | -0.428080 | H                                       | 5.524173  | -0.745950 | 8.082221  |
| H                                                                 | -0.985783 | 0.031330  | -0.442606 | H                                       | 3.886521  | -1.410510 | 8.145934  |
| H                                                                 | 0.593274  | 0.832558  | -0.428315 | H                                       | 5.097298  | -2.146729 | 7.090662  |

| 3-Octyl: 4 <sup>c</sup> s <sub>p</sub> s <sub>p</sub> |           |           |           | 3-Octyl: 4 <sup>s</sup> s <sub>p</sub> s <sub>p</sub> |           |           |           |
|-------------------------------------------------------|-----------|-----------|-----------|-------------------------------------------------------|-----------|-----------|-----------|
| Cartesian Coordinates (Å)                             |           |           |           | Cartesian Coordinates (Å)                             |           |           |           |
| C                                                     | -0.078750 | -0.130860 | -0.051808 | C                                                     | 0.013735  | 0.031591  | -0.042935 |
| C                                                     | -0.023165 | 0.013027  | 1.449316  | C                                                     | 0.008843  | 0.023551  | 1.467396  |
| C                                                     | 1.331400  | 0.065060  | 2.168956  | C                                                     | 1.338647  | -0.012039 | 2.236844  |
| C                                                     | 1.094061  | 1.484031  | 2.704227  | C                                                     | 1.062832  | -1.405518 | 2.819879  |
| C                                                     | 2.005498  | 2.612597  | 2.289904  | C                                                     | 0.782074  | -1.553800 | 4.294450  |
| C                                                     | 1.479643  | 4.003153  | 2.665155  | C                                                     | 0.239899  | -2.933267 | 4.686723  |
| H                                                     | -0.076030 | 1.341089  | 1.927093  | H                                                     | -0.104502 | -1.257297 | 2.044086  |
| H                                                     | 0.738625  | 1.526152  | 3.736153  | H                                                     | 1.633330  | -2.218717 | 2.366219  |

|   |           |           |           |   |           |           |           |
|---|-----------|-----------|-----------|---|-----------|-----------|-----------|
| H | 2.175362  | 0.018230  | 1.472716  | H | 1.446265  | 0.769292  | 2.994764  |
| H | 1.482337  | -0.701374 | 2.933573  | H | 2.217151  | 0.026959  | 1.585928  |
| H | 2.178432  | 2.567138  | 1.204940  | H | -0.771647 | 0.625985  | 1.937027  |
| H | 3.000092  | 2.468357  | 2.747527  | H | 0.071263  | -0.776746 | 4.611733  |
| H | -0.809299 | -0.511372 | 1.997191  | H | 1.704844  | -1.353150 | 4.866563  |
| H | 0.646166  | 0.554507  | -0.512044 | H | -0.975600 | -0.258001 | -0.416891 |
| H | 0.258486  | -1.142598 | -0.334138 | H | 0.717006  | -0.728285 | -0.409970 |
| H | 1.304524  | 4.040819  | 3.748468  | H | 0.951564  | -3.704261 | 4.362954  |
| H | 0.499506  | 4.152564  | 2.195107  | H | -0.686495 | -3.124139 | 4.130548  |
| C | -1.471323 | 0.120559  | -0.637806 | C | 0.397228  | 1.398203  | -0.640481 |
| H | -1.475518 | -0.005685 | -1.724946 | H | 1.393690  | 1.710265  | -0.310609 |
| H | -2.206413 | -0.575343 | -0.218554 | H | 0.402872  | 1.362532  | -1.735472 |
| H | -1.812512 | 1.136142  | -0.412227 | H | -0.311706 | 2.174230  | -0.332774 |
| C | 2.427487  | 5.134540  | 2.259498  | C | -0.019310 | -3.074009 | 6.188735  |
| H | 2.024150  | 6.113477  | 2.536998  | H | -0.407258 | -4.067122 | 6.436264  |
| H | 3.404226  | 5.027473  | 2.744712  | H | 0.899490  | -2.922347 | 6.766418  |
| H | 2.597317  | 5.140042  | 1.176847  | H | -0.751198 | -2.335639 | 6.535310  |

| 3-Octyl: 5s <sub>B</sub> <sup>A</sup> s <sub>B</sub> <sup>A</sup> |           |           |           | 3-Octyl: 5s <sub>B</sub> <sup>A</sup> s <sub>B</sub> <sup>E</sup> |           |           |           |
|-------------------------------------------------------------------|-----------|-----------|-----------|-------------------------------------------------------------------|-----------|-----------|-----------|
| Cartesian Coordinates (Å)                                         |           |           |           | Cartesian Coordinates (Å)                                         |           |           |           |
| C                                                                 | -0.003854 | -0.048293 | -0.009054 | C                                                                 | -0.015096 | 0.109630  | -0.033041 |
| C                                                                 | -0.002106 | -0.041558 | 1.518629  | C                                                                 | -0.010558 | 0.016541  | 1.474039  |
| C                                                                 | 1.492102  | 0.034562  | 1.943295  | C                                                                 | 1.314399  | 0.012708  | 2.227258  |
| C                                                                 | 2.187925  | 0.877445  | 0.875669  | C                                                                 | 1.089766  | -0.914986 | 3.450548  |
| H                                                                 | 1.225309  | 0.574704  | -0.064866 | C                                                                 | 0.173381  | -2.035216 | 2.959749  |
| H                                                                 | -0.505080 | -0.916652 | 1.948011  | H                                                                 | -0.346683 | -1.231831 | 1.962577  |
| H                                                                 | -0.537119 | 0.840457  | 1.886892  | H                                                                 | -0.775716 | 0.641308  | 1.948155  |
| H                                                                 | 1.925050  | -0.971449 | 1.963394  | H                                                                 | 1.651278  | 1.013657  | 2.521810  |
| H                                                                 | 1.609260  | 0.447031  | 2.952911  | H                                                                 | 2.097955  | -0.405020 | 1.582406  |
| C                                                                 | 2.186419  | 2.380523  | 1.055538  | H                                                                 | 0.591290  | -0.352921 | 4.248452  |
| H                                                                 | 2.787386  | 2.638720  | 1.942952  | H                                                                 | 2.034748  | -1.286601 | 3.865389  |
| H                                                                 | 1.168567  | 2.725739  | 1.282447  | H                                                                 | 0.386562  | 1.088802  | -0.344441 |
| C                                                                 | 2.726931  | 3.141784  | -0.158890 | H                                                                 | 0.679351  | -0.633699 | -0.447641 |
| H                                                                 | 2.118652  | 2.946089  | -1.048276 | C                                                                 | -1.404684 | -0.078403 | -0.651751 |
| H                                                                 | 2.730320  | 4.222335  | 0.015397  | H                                                                 | -1.370982 | 0.005392  | -1.742480 |
| H                                                                 | 3.754415  | 2.837975  | -0.388411 | H                                                                 | -1.815767 | -1.062026 | -0.401011 |
| H                                                                 | 3.142984  | 0.488783  | 0.514525  | H                                                                 | -2.106640 | 0.676492  | -0.280592 |
| C                                                                 | 0.134398  | -1.384298 | -0.707363 | C                                                                 | 0.819945  | -3.238570 | 2.307582  |
| H                                                                 | 0.975015  | -1.943563 | -0.274720 | H                                                                 | 1.419458  | -3.778335 | 3.059227  |
| H                                                                 | -0.760138 | -1.994331 | -0.500059 | H                                                                 | 1.539212  | -2.908763 | 1.545695  |
| C                                                                 | 0.322571  | -1.263295 | -2.222736 | C                                                                 | -0.186736 | -4.206647 | 1.677733  |
| H                                                                 | 1.233400  | -0.704530 | -2.462466 | H                                                                 | -0.766151 | -3.714706 | 0.889227  |

|                                                                   |           |           |           |                                         |           |           |           |
|-------------------------------------------------------------------|-----------|-----------|-----------|-----------------------------------------|-----------|-----------|-----------|
| H                                                                 | 0.396118  | -2.246946 | -2.697054 | H                                       | 0.314421  | -5.073495 | 1.235643  |
| H                                                                 | -0.519724 | -0.733831 | -2.682013 | H                                       | -0.896607 | -4.577229 | 2.425581  |
| H                                                                 | -0.734643 | 0.610631  | -0.483830 | H                                       | -0.647887 | -2.300064 | 3.629762  |
| 3-Octyl: 5s <sub>β</sub> <sup>E</sup> s <sub>β</sub> <sup>E</sup> |           |           |           | 4-Octyl: 3s <sub>β</sub> s <sub>β</sub> |           |           |           |
| Cartesian Coordinates (Å)                                         |           |           |           | Cartesian Coordinates (Å)               |           |           |           |
| C                                                                 | 0.011842  | 0.028292  | -0.033329 | C                                       | -0.018676 | 0.008893  | -0.025992 |
| C                                                                 | -0.001176 | 0.006332  | 1.476075  | C                                       | -0.009673 | -0.005457 | 1.504447  |
| C                                                                 | 1.314795  | -0.004209 | 2.245163  | C                                       | 1.405508  | -0.003730 | 2.098385  |
| C                                                                 | 1.041926  | -0.860659 | 3.505985  | C                                       | 1.437223  | -0.055549 | 3.599048  |
| C                                                                 | 0.138606  | -1.994161 | 3.032877  | C                                       | 2.623419  | 0.423722  | 4.375534  |
| C                                                                 | -0.922086 | -2.539517 | 3.957966  | C                                       | 2.971063  | -0.151142 | 5.718863  |
| C                                                                 | -1.849290 | -3.560477 | 3.289480  | C                                       | 3.836187  | 0.773036  | 6.586418  |
| H                                                                 | -0.368682 | -1.216293 | 2.007683  | C                                       | 4.213315  | 0.153522  | 7.934232  |
| H                                                                 | -0.752450 | 0.673218  | 1.913861  | H                                       | 1.499512  | 1.067855  | 4.252832  |
| H                                                                 | 1.685817  | 0.997548  | 2.492020  | H                                       | 3.408532  | 0.904008  | 3.796454  |
| H                                                                 | 2.087997  | -0.488159 | 1.634120  | H                                       | 0.789436  | -0.764304 | 4.109301  |
| H                                                                 | 0.505875  | -0.257141 | 4.250213  | H                                       | 2.046928  | -0.397426 | 6.261287  |
| H                                                                 | 1.965458  | -1.207771 | 3.984132  | H                                       | 3.494299  | -1.115969 | 5.589911  |
| H                                                                 | 0.674566  | -2.772565 | 2.478326  | H                                       | 1.942759  | 0.891069  | 1.752516  |
| H                                                                 | -1.515417 | -1.707728 | 4.361631  | H                                       | 1.970774  | -0.857011 | 1.681620  |
| H                                                                 | -0.444128 | -3.009002 | 4.834453  | H                                       | 4.748730  | 1.032364  | 6.033463  |
| H                                                                 | 0.455443  | 0.974258  | -0.387231 | H                                       | 3.300616  | 1.717287  | 6.745450  |
| H                                                                 | 0.679052  | -0.762031 | -0.403558 | H                                       | -0.549148 | -0.890597 | 1.866663  |
| H                                                                 | -2.597508 | -3.940882 | 3.991880  | H                                       | -0.559378 | 0.862197  | 1.890105  |
| H                                                                 | -2.379302 | -3.113694 | 2.441574  | H                                       | 4.831733  | 0.833549  | 8.528443  |
| H                                                                 | -1.282493 | -4.417789 | 2.909762  | H                                       | 3.321100  | -0.085368 | 8.524134  |
| C                                                                 | -1.378951 | -0.134611 | -0.656291 | H                                       | 4.776694  | -0.776647 | 7.799318  |
| H                                                                 | -1.333219 | -0.105950 | -1.749417 | H                                       | -1.039456 | 0.005232  | -0.420841 |
| H                                                                 | -1.830720 | -1.087849 | -0.362104 | H                                       | 0.485725  | 0.900086  | -0.416485 |
| H                                                                 | -2.052954 | 0.665022  | -0.329555 | H                                       | 0.499322  | -0.866574 | -0.433544 |



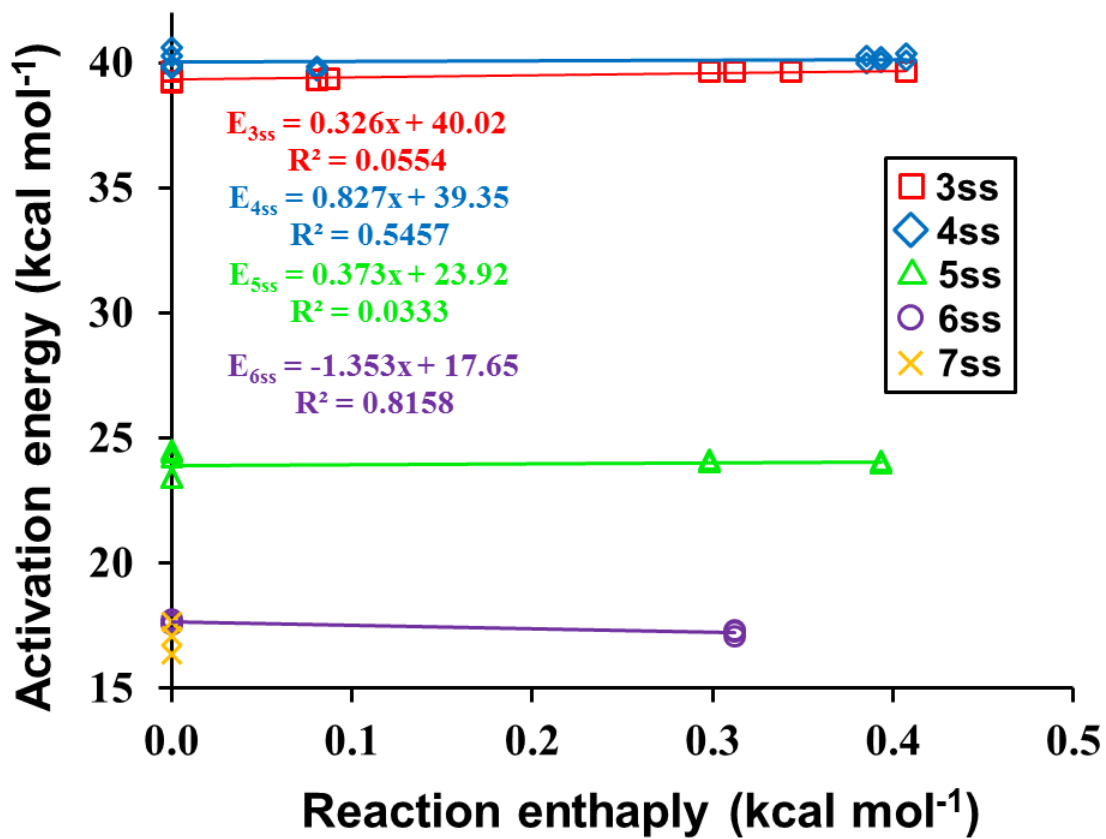

Figure S.1 Evans Polanyi plot of activation energy versus reaction enthalpy for s-alkyl radical H-migrations
